# Supplementary material for: A fast and direct iodide-catalyzed oxidative 2-selenylation of tryptophan
Source: Royal Society of Chemistry journal article supplement (doi:10.1039/d1cc00700a), 2021-01-01
Supplement: d1cc00700a1.pdf [file d1cc00700a1.pdf]

## Supplementary Information

### A Fast and Direct Iodide-Catalyzed Oxidative 2-Selenylation of Tryptophan

Yu-Ting Gao, Shao-Dong Liu, Liang Cheng,\* and Li Liu\*

*Beijing National Laboratory for Molecular Sciences (BNLMS), CAS Key Laboratory of Molecular Recognition and Function, CAS Research/Education Center for Excellence in Molecular Sciences, Institute of Chemistry, Chinese Academy of Sciences, Beijing 100190, China and University of Chinese Academy of Sciences, Beijing 100049, China.*

[chengl@iccas.ac.cn](mailto:chengl@iccas.ac.cn); [lliu@iccas.ac.cn](mailto:lliu@iccas.ac.cn)

14 June 2021

Note added after first publication:

This supplementary information file replaces that originally published on 02 March 2021. Some of the NMR assignments in the original version were incorrect but these data have now been corrected in this revised version. Some of the structures included with the NMR spectra were also incorrect, as some COOMe groups were drawn as OMe. These structures have also been corrected. This does not affect any of the results or conclusions of the paper.

---

#### Table of contents

---

|           |                                                                     |         |
|-----------|---------------------------------------------------------------------|---------|
| <b>1</b>  | General information                                                 | S2      |
|           | Synthesis of Substrates                                             | S3-S9   |
| <b>3</b>  | Optimization of reaction conditions                                 | S10     |
| <b>4</b>  | General procedure for synthesis of <b>3</b> , <b>4</b> and <b>5</b> | S11-S21 |
| <b>5</b>  | Control experiments                                                 | S22-S23 |
| <b>6</b>  | X-ray crystallographic data                                         | S24-S29 |
| <b>7</b>  | NMR spectra                                                         | S30-S86 |
| <b>8</b>  | HPLC spectra                                                        | S87     |
| <b>9</b>  | CD spectra                                                          | S88     |
| <b>10</b> | References                                                          | S89     |

---

## 1. General Information

Unless otherwise noted, all reagents were obtained from commercial suppliers and were used without further purification. All reactions were carried out under the air atmosphere. Trp-substrates **1** and diselenides **2** were obtained from commercial suppliers or prepared according to the literature procedures.<sup>[1-4]</sup>

TLC analysis was performed on glass-baked silica plates and visualized with UV light. Column chromatography was performed on silica gel (200-300 mesh) using petroleum ether / ethyl acetate / dichloromethane/methanol. <sup>1</sup>H, <sup>13</sup>C and <sup>19</sup>F NMR spectra were obtained on Bruker 300 MHz, 400 MHz or 500 MHz NMR spectrometer in the deuterated solvents indicated. Chemical shifts are reported in ppm from tetramethylsilane with the solvent resonance as the internal standard. The following abbreviations were used to designate chemical shift multiplicities: s = singlet, d = doublet, t = triplet, q = quartet, h = heptet, m = multiplet. All first-order splitting patterns were assigned on the basis of the appearance of the multiplet. Splitting patterns that could not be easily interpreted are designated as multiplet (m) or (br). Melting points were measured on Beijing Tech X-4 apparatus without correction. IR spectra were recorded on a Nicolet 6700 FT-IR spectrometer. HRMS were obtained using electrospray ionization (ESI), nano electrospray ionization (nano ESI), electron ionization (EI) and atmospheric pressure chemical ionization (APCI) mass spectrometers. HPLC analyses were performed on Varian Prostar 210 liquid chromatograph and Agilent 1260 liquid chromatograph. Circular dichroism spectra was JASCO J-815 spectropolarimeter.

## 2. Synthesis of substrates

### 2.1 Preparation of methyl acetyl-*L*-tryptophanate and methyl acetyl-*DL*-tryptophanate<sup>[1]</sup>

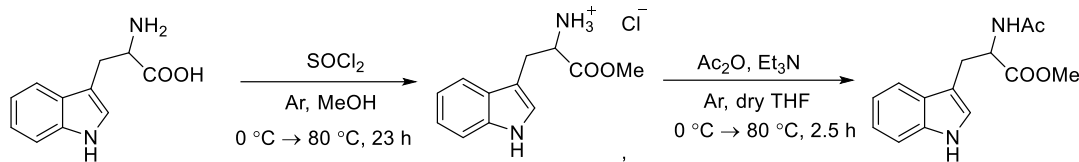

**General procedure:** *L*-Tryptophan or *DL*-Tryptophan (4.9 mmol, 1.0 g) was dispersed in MeOH (9.8 mL) under the argon atmosphere. To the suspension was added thionyl chloride (5.4 mmol, 0.39 mL) dropwise at 0 °C. The mixture was then heated to reflux for 23 hours and then cooled to room temperature. MeOH and excess thionyl chloride were removed in vacuum. The pink solid (methyl *L*-tryptophanate hydrochloride) was obtained and was used for the next step without further purification. The pink solid was dispersed in dry THF (20 mL) under the argon atmosphere and Et<sub>3</sub>N (9.8 mmol, 1.4 mL) was added. The mixture was stirred at room temperature for 5 minutes. Acetic anhydride (5.4 mmol, 0.5 mL) was then added dropwise at 0 °C. The resulting solution was heated to reflux for 2.5 hours. After cooling to room temperature, the mixture was diluted with ethyl acetate (50 mL) and the organic layer was washed by 1M HCl (20 mL), saturated NaHCO<sub>3</sub> (20 mL) and saturated NaCl (10 mL). Ethyl acetate was removed by rotary evaporator and the crude product was purified by silica column chromatography (elute: dichloromethane /methanol 50/1) to afford the desired product methyl acetyl-*L*-tryptophanate or methyl acetyl-*DL*-tryptophanate **1a**.

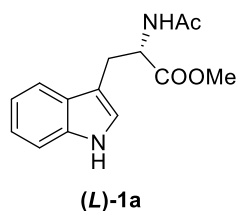

**methyl acetyl-*L*-tryptophanate L-1a.** White solid, m.p. 55-57 °C. <sup>1</sup>H NMR (300 MHz, DMSO-*d*<sub>6</sub>) δ 10.85 (s, 1H), 8.29 (d, *J* = 7.5 Hz, 1H), 7.48 (d, *J* = 7.8 Hz, 1H), 7.34 (d, *J* = 7.8 Hz, 1H), 7.14 (d, *J* = 2.1 Hz, 1H), 7.09-6.96 (m, 2H), 4.49 (dd, *J* = 13.5, 8.1 Hz, 1H), 3.57 (s, 3H), 3.17-2.97 (m, 2H), 1.81 (s, 3H). <sup>13</sup>C NMR (75 MHz, DMSO-*d*<sub>6</sub>) δ 172.5, 169.3, 136.1, 127.0, 123.6, 120.9, 118.4, 117.9, 111.4, 109.5, 53.1, 51.7, 27.1, 22.3. IR ν<sub>max</sub> (KBr, film, cm<sup>-1</sup>): 2389, 3058, 2951, 2926, 2850, 1738, 1655, 1530, 1458, 1437, 1375, 1216, 1010, 743. HRMS (ESI): calcd for C<sub>14</sub>H<sub>24</sub>O<sub>16</sub>O<sub>3</sub>N<sub>2</sub>Na<sup>+</sup> [M+Na]<sup>+</sup>: 283.1053, found: 283.1053.

### 2.2 Preparation of substituted methyl acetyl tryptophanate **1**<sup>[2,3]</sup>

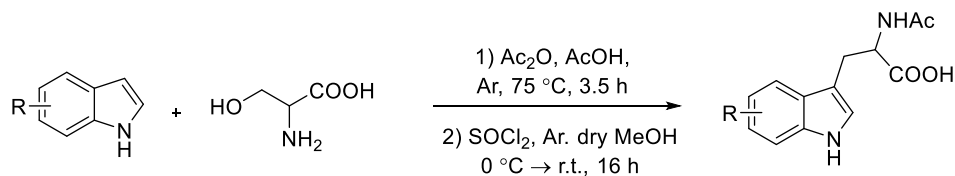

**General procedure:** The substituted indole (3.3 mmol) and *DL*-serine (6.6 mmol, 693.6 mg) were dissolved in acetic acid (7.7 mL) under the argon atmosphere, acetic anhydride (6.6 mmol, 0.6 mL) was then added dropwise. The mixture was stirred at 75 °C for 3.5 hours. After cooling to room temperature, the solution was adjusted to pH = 11 by addition of 30% aqueous sodium hydroxide carefully in ice bath and extracted with ether (10 mL × 3). The ether phase was washed by 1M NaOH (30 mL). All the aqueous solutions were combined and adjusted to pH = 2 using concentrated hydrochloric acid at 0 °C. The resulting mixture was extracted by EA/MeOH (10/1, 30 mL × 3). The organic was dried over anhydrous sodium sulfate,

evaporated and got the crude intermediate product.

To the crude intermediate product we got above was added dry MeOH (10 mL) under argon atmosphere, the mixture was stirred at 0 °C for 5 minutes. Then the thionyl chloride (3.6 mmol, 0.7 mL) was added dropwise and the reaction was stirred at 0 °C for another 1.5 hours. After stirring at room temperature overnight, MeOH and excess thionyl chloride were removed in vacuum. The crude product was diluted with ethyl acetate (50 mL) and washed by H<sub>2</sub>O (50 mL). Ethyl acetate was removed by rotary evaporator and the crude product was purified by silica column chromatography (elute: petroleum ether / ethyl acetate 1/3) to afford the desired product substituted methyl acetyl tryptophanate **1b-g**.

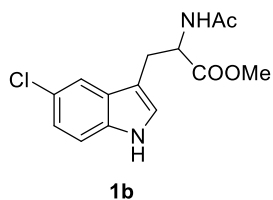

**methyl 2-acetamido-3-(5-chloro-1H-indol-3-yl)propanoate 1b.** White solid, m.p. 72-73 °C. <sup>1</sup>H NMR (500 MHz, CDCl<sub>3</sub>) δ 8.71 (s, 1H), 7.49 (s, 1H), 7.29 (d, *J* = 8.0 Hz, 1H), 7.14 (d, *J* = 8.0 Hz, 1H), 7.00 (s, 1H), 6.19 (d, *J* = 7.5 Hz, 1H), 4.95 (dd, *J* = 13.0, 5.0 Hz, 1H), 3.73 (s, 3H), 3.34-3.24 (m, 2H), 2.00 (s, 3H). <sup>13</sup>C NMR (126 MHz, CDCl<sub>3</sub>) δ 172.2, 169.9, 134.5, 128.7, 125.3, 124.3, 122.4, 118.0, 112.4, 109.6, 53.0, 52.4, 27.5, 23.1. IR ν<sub>max</sub> (KBr, film, cm<sup>-1</sup>): 3282, 2951, 1734, 1654, 1528, 1437, 1374, 1215, 893, 729. HRMS (ESI): calcd for C<sub>14</sub>H<sub>15</sub>O<sub>3</sub>N<sub>2</sub>ClNa<sup>+</sup> [M+Na]<sup>+</sup>: 317.0663, found: 317.0669.

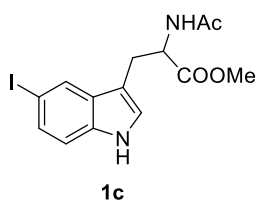

**methyl 2-acetamido-3-(5-iodo-1H-indol-3-yl)propanoate 1c.** White solid, m.p. 72-73 °C. <sup>1</sup>H NMR (300 MHz, CDCl<sub>3</sub>) δ 8.34 (s, 1H), 7.84 (s, 1H), 7.42 (d, *J* = 8.7 Hz, 1H), 7.13 (d, *J* = 8.4 Hz, 1H), 6.93 (d, *J* = 2.1 Hz, 1H), 6.04 (d, *J* = 7.2 Hz, 1H), 4.93 (dd, *J* = 12.9, 8.1 Hz, 1H), 3.72 (s, 3H), 3.34-3.20 (m, 2H), 2.00 (s, 3H). <sup>13</sup>C NMR (101 MHz, CDCl<sub>3</sub>) δ 172.2, 169.7, 135.1, 130.5, 130.3, 127.7, 123.6, 113.3, 109.6, 83.1, 53.0, 52.5, 27.5, 23.3. IR ν<sub>max</sub> (KBr, film, cm<sup>-1</sup>): 3276, 2951, 2923, 2850, 1737, 1655, 1527, 1455, 1436, 1373, 1213, 879, 795. HRMS (ESI): calcd for C<sub>14</sub>H<sub>15</sub>O<sub>3</sub>N<sub>2</sub>I<sup>+</sup> [M+Na]<sup>+</sup>: 409.0020, found: 409.0020.

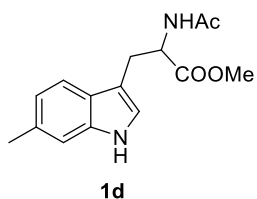

**methyl 2-acetamido-3-(6-methyl-1H-indol-3-yl)propanoate 1d.** Yellow solid, m.p. 53-54 °C. <sup>1</sup>H NMR (500 MHz, CDCl<sub>3</sub>) δ 8.09 (s, 1H), 7.40 (d, *J* = 8.0 Hz, 1H), 7.15 (s, 1H), 6.95 (d, *J* = 8.0 Hz, 1H), 6.89 (s, 1H), 6.00 (d, *J* = 6.5 Hz, 1H), 4.94 (dd, *J* = 12.3, 5.3 Hz, 1H), 3.70 (s, 3H), 3.34-3.25 (m, 2H), 2.45 (s, 3H), 1.95 (s, 3H). <sup>13</sup>C NMR (126 MHz, CDCl<sub>3</sub>) δ 172.4, 169.7, 136.6, 132.1, 125.6, 122.0, 121.5, 118.2, 111.2, 109.8, 53.0, 52.3, 27.6, 23.2, 21.6. IR ν<sub>max</sub> (KBr, film, cm<sup>-1</sup>): 3292, 3011, 2951, 2922, 2855, 1740, 1655, 1528, 1437, 1374, 1215, 801. HRMS (ESI): calcd for C<sub>15</sub>H<sub>18</sub>O<sub>3</sub>N<sub>2</sub>Na<sup>+</sup> [M+Na]<sup>+</sup>: 297.1210, found: 297.1211.

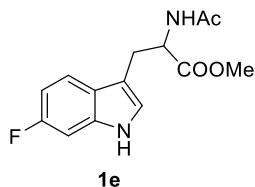

**methyl 2-acetamido-3-(6-fluoro-1H-indol-3-yl)propanoate 1e.** White solid, m.p. 144-145 °C.  $^1\text{H}$  NMR (400 MHz, DMSO- $d_6$ )  $\delta$  10.93 (s, 1H), 8.31 (d,  $J$  = 7.2 Hz, 1H), 7.50-7.44 (m, 1H), 7.14-7.09 (m, 2H), 6.85 (t,  $J$  = 8.8 Hz, 1H), 4.47 (dd,  $J$  = 14.0, 7.2 Hz, 1H), 3.57 (s, 3H), 3.13-2.97 (m, 2H), 1.80 (s, 3H).  $^{13}\text{C}$  NMR (126 MHz, DMSO- $d_6$ )  $\delta$  172.5, 169.3, 158.8 (d,  $J$  = 187.9 Hz), 135.9 (d,  $J$  = 10.1 Hz), 124.2 (d,  $J$  = 2.0 Hz), 123.9, 119.0 (d,  $J$  = 8.1 Hz), 109.8, 106.9 (d,  $J$  = 19.2 Hz), 97.4 (d,  $J$  = 20.2 Hz), 53.1, 51.8, 27.0, 22.3.  $^{19}\text{F}$  NMR (377 MHz,  $\text{CDCl}_3$ )  $\delta$  -121.0 (s). IR  $\nu_{\text{max}}$  (KBr, film,  $\text{cm}^{-1}$ ): 3291, 3067, 2953, 2925, 2850, 1738, 1657, 1629, 1550, 1458, 1438, 1374, 1216, 1140, 952, 804. HRMS (ESI): calcd for  $\text{C}_{14}\text{H}_{15}\text{O}_3\text{N}_2\text{FNa}^+$  [ $\text{M}+\text{Na}$ ] $^+$ : 301.0959, found: 301.0962.

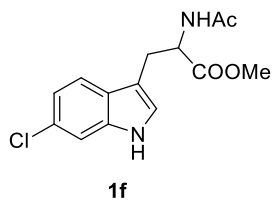

**methyl 2-acetamido-3-(6-chloro-1H-indol-3-yl)propanoate 1f.** White solid, m.p. 144-145 °C.  $^1\text{H}$  NMR (300 MHz,  $\text{CDCl}_3$ )  $\delta$  8.17 (s, 1H), 7.43 (d,  $J$  = 8.4 Hz, 1H), 7.35 (d,  $J$  = 1.5 Hz, 1H), 7.09 (dd,  $J$  = 8.4, 1.8 Hz, 1H), 6.96 (d,  $J$  = 2.4 Hz, 1H), 5.98 (d,  $J$  = 6.9 Hz, 1H), 4.94 (dd,  $J$  = 13.2, 5.4 Hz, 1H), 3.69 (s, 3H), 3.36-3.23 (m, 2H), 1.97 (s, 3H).  $^{13}\text{C}$  NMR (126 MHz,  $\text{CDCl}_3$ )  $\delta$  172.3, 169.7, 136.4, 128.2, 126.4, 123.2, 120.5, 119.5, 111.2, 110.4, 53.0, 52.4, 27.6, 23.3. IR  $\nu_{\text{max}}$  (KBr, film,  $\text{cm}^{-1}$ ): 3282, 2925, 2852, 1737, 1657, 1544, 1456, 1327, 1374, 1215, 907, 805. HRMS (ESI): calcd for  $\text{C}_{14}\text{H}_{15}\text{O}_3\text{N}_2\text{ClNa}^+$  [ $\text{M}+\text{Na}$ ] $^+$ : 317.0663, found: 317.0668.

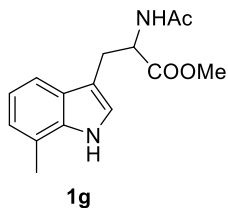

**methyl 2-acetamido-3-(7-methyl-1H-indol-3-yl)propanoate 1g.** White solid, m.p. 172-173 °C.  $^1\text{H}$  NMR (500 MHz, DMSO- $d_6$ )  $\delta$  10.82 (s, 1H), 8.28 (d,  $J$  = 7.5 Hz, 1H), 7.31 (d,  $J$  = 7.5 Hz, 1H), 7.13 (d,  $J$  = 1.5 Hz, 1H), 6.92-6.86 (m, 2H), 4.48 (dd,  $J$  = 14.0, 8.0 Hz, 1H), 3.58 (s, 3H), 3.13-2.98 (m, 2H), 2.43 (s, 3H), 1.81 (s, 3H).  $^{13}\text{C}$  NMR (126 MHz, DMSO- $d_6$ )  $\delta$  172.6, 169.3, 135.6, 126.7, 123.3, 121.5, 120.5, 118.6, 115.6, 109.9, 53.1, 51.7, 27.2, 22.3, 16.7. IR  $\nu_{\text{max}}$  (KBr, film,  $\text{cm}^{-1}$ ): 3292, 3054, 2924, 2854, 1738, 1657, 1527, 1437, 1374, 1216, 779, 747. HRMS (ESI): calcd for  $\text{C}_{15}\text{H}_{18}\text{O}_3\text{N}_2\text{Na}^+$  [ $\text{M}+\text{Na}$ ] $^+$ : 297.1210, found: 297.1212.

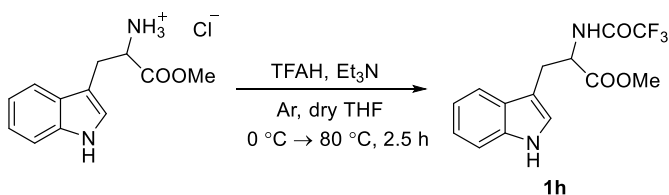

**Preparation of 1h:** methyl *L*-tryptophanate hydrochloride (2.0 mmol, 509.4 mg) was dispersed in dry THF (8 mL) under the argon atmosphere and Et<sub>3</sub>N (4.0 mmol, 0.6 mL) was added. The mixture was stirred at room temperature for 5 minutes. Trifluoroacetic anhydride (2.2 mmol, 0.3 mL) was then added dropwise at 0 °C. The resulting solution was heated to reflux for 2.5 hours. After cooling to room temperature, the mixture was diluted with ethyl acetate (50 mL) and the organic layer was washed by water (15 mL) and saturated NaCl (10 mL). Ethyl acetate was removed *in vacuo* and the crude product was purified by silica column chromatography (elute: petroleum ether / ethyl acetate from 50/1 to 7/1) to afford the desired product methyl (2,2,2-trifluoroacetyl)-*L*-tryptophanate **1h**.

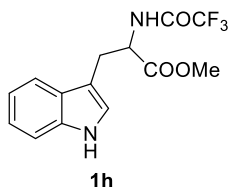

**methyl (2,2,2-trifluoroacetyl)-*L*-tryptophanate 1h.** Pale yellow solid, m.p. 109 -111 °C. <sup>1</sup>H NMR (400 MHz, DMSO-*d*<sub>6</sub>) δ 10.89 (s, 1H), 9.92 (d, *J* = 7.6 Hz, 1H), 7.53 (d, *J* = 8.0 Hz, 1H), 7.34 (d, *J* = 8.0 Hz, 1H), 7.15 (s, 1H), 7.08 (t, *J* = 7.4 Hz, 1H), 6.99 (t, *J* = 7.4 Hz, 1H), 4.59 (dd, *J* = 13.2, 9.2 Hz, 1H), 3.67 (s, 3H), 3.33-3.16 (m, 2H). <sup>13</sup>C NMR (101 MHz, DMSO-*d*<sub>6</sub>) δ 170.7, 156.4 (q, *J* = 37.0 Hz), 136.1, 126.9, 123.7, 121.1, 118.5, 117.9, 115.7 (q, *J* = 289.1 Hz), 111.5, 109.1, 53.7, 52.3, 25.9. <sup>19</sup>F NMR (377 MHz, DMSO-*d*<sub>6</sub>) δ -74.2 (s). IR  $\nu_{\max}$  (KBr, film, cm<sup>-1</sup>): 3408, 2925, 2851, 1714, 1550, 1458, 1439, 1213, 1175, 745. HRMS (ESI): calcd for C<sub>14</sub>H<sub>12</sub>O<sub>3</sub>N<sub>2</sub>F<sub>2</sub><sup>+</sup> [M-H]<sup>+</sup>: 313.0806, found: 313.0800.

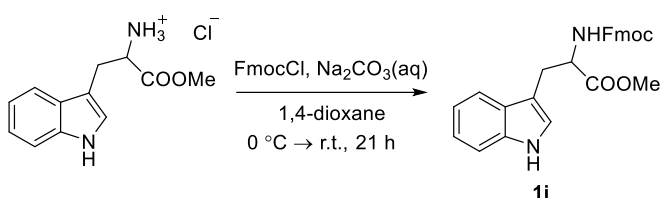

**Preparation of 1i:** methyl *L*-tryptophanate hydrochloride (2.0 mmol, 509.4 mg) was dispersed in 1,4-dioxane (2 mL), Na<sub>2</sub>CO<sub>3</sub> aqueous solution (10%, 4.0 mL) was then added at 0 °C. After stirring 30 min at 0 °C, FmocCl (1.95 mmol, 504.5 mg in 2 mL of 1,4-dioxane) was added dropwise. The mixture was stirred at 0 °C for another 2 hour and continued overnight at room temperature. After the reaction completed, the mixture was diluted with ethyl acetate (50 mL) and the organic layer was washed by water and saturated NaCl (10 mL). Ethyl acetate was removed by rotary evaporator and the crude product was purified by silica column chromatography (elute: petroleum ether / ethyl acetate from 5/1 to 3/1) to afford the desired product methyl (((9*H*-fluoren-9-yl)methoxy)carbonyl)-*L*-tryptophanate **1i**.

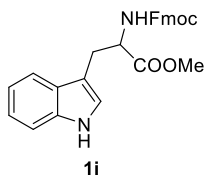

**methyl (((9*H*-fluoren-9-yl)methoxy)carbonyl)-*L*-tryptophanate 1i.** Pale yellow solid, m.p. 72 -74 °C. <sup>1</sup>H NMR (400 MHz, DMSO-*d*<sub>6</sub>) δ 10.89 (s, 1H), 7.88 (d, *J* = 7.2 Hz, 3H), 7.67 (t, *J* = 8.0 Hz, 2H), 7.54 (d, *J* = 8.0 Hz, 1H), 7.43-7.27 (m, 5H), 7.19 (s, 1H), 7.08 (t, *J* = 7.4 Hz, 1H), 7.00 (t, *J* = 7.4 Hz, 1H), 4.32 (dd, *J* = 13.8, 8.6 Hz, 1H), 4.26-4.19 (m, 3H), 3.62 (s, 3H), 3.22-3.04 (m, 2H). <sup>13</sup>C NMR (101 MHz, DMSO-*d*<sub>6</sub>) δ 172.7, 155.9, 143.7, 143.7, 140.7, 136.1, 127.6, 127.1, 125.2, 123.8, 121.0, 120.1, 118.4, 118.0, 111.5, 109.7, 65.7, 55.0, 51.9, 46.6, 26.9. IR  $\nu_{\max}$  (KBr, film, cm<sup>-1</sup>): 3414, 3062, 2951, 1710, 1517, 1451, 1340, 1214, 1053, 739. HRMS (ESI): calcd for C<sub>27</sub>H<sub>24</sub>O<sub>4</sub>N<sub>2</sub>Na<sup>+</sup> [M+Na]<sup>+</sup>: 463.1628, found: 463.1625.

### 2.3 Preparation of substituted diselenides **2**<sup>[4]</sup>

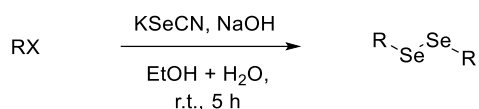

*General procedure:* To the solution of benzyl or alkyl bromide (5 mmol) in ethanol (15 mL) was added KSeCN (6.0 mmol). The solution became cloudy very quickly. The 3.0 M NaOH (4 mL) was added into the mixture after the benzyl or alkyl bromide converted to the intermediates completely (monitored by TLC). The reaction was allowed to stir at room temperature until the intermediates totally converted to the products (monitored by TLC). Most ethanol was removed *in vacuum* and the mixture was diluted with DCM (20 mL) and washed by H<sub>2</sub>O (50 mL). The organic layer was dried over anhydrous sodium sulfate, evaporated and purified by silica column chromatography (elute: petroleum ether /dichloromethane) to afford the desired product substituted diselenides **2**.

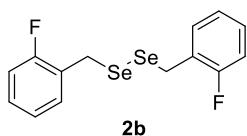

**1,2-bis(2-fluorobenzyl)diselane 2b.** Yellow solid, m.p. 58-59 °C. <sup>1</sup>H NMR (400 MHz, CDCl<sub>3</sub>) δ 7.25-7.17 (m, 4H), 7.10-7.01 (m, 4H), 3.91 (s, 4H). <sup>13</sup>C NMR (101 MHz, CDCl<sub>3</sub>) δ 160.6 (d, *J* = 248.5 Hz), 131.0 (d, *J* = 4.0 Hz), 128.9 (d, *J* = 9.1 Hz), 126.4 (d, *J* = 14.1 Hz), 123.9 (d, *J* = 3.0 Hz), 115.5 (d, *J* = 21.2 Hz), 25.1 (d, *J* = 2.0 Hz). <sup>19</sup>F NMR (377 MHz, CDCl<sub>3</sub>) δ -116.9 (s). IR ν<sub>max</sub> (KBr, film, cm<sup>-1</sup>): 3069, 2921, 1581, 1489, 1457, 1234, 1171, 1079, 1074, 856, 764. HRMS (APCI): calcd for C<sub>14</sub>H<sub>13</sub>F<sub>2</sub>Se<sub>2</sub><sup>+</sup> [M+H]<sup>+</sup>: 378.9310, found: 378.9307.

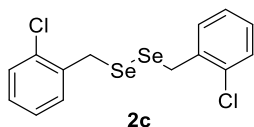

**1,2-bis(2-chlorobenzyl)diselane 2c.** Yellow solid, m.p. 102-103 °C. <sup>1</sup>H NMR (400 MHz, CDCl<sub>3</sub>) δ 7.40-7.34 (m, 2H), 7.20-7.19 (m, 6H), 3.99 (s, 4H). <sup>13</sup>C NMR (101 MHz, CDCl<sub>3</sub>) δ 136.7, 133.8, 130.8, 129.7, 128.5, 126.6, 30.5. IR ν<sub>max</sub> (KBr, film, cm<sup>-1</sup>): 3060, 2996, 2923, 1589, 1475, 1442, 1414, 1172, 1050, 1032, 831, 757, 725. HRMS (EI): calcd for C<sub>14</sub>H<sub>12</sub>Cl<sub>2</sub>Se<sub>2</sub><sup>+</sup> [M]<sup>+</sup>: 409.8641, found: 409.8634.

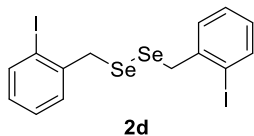

**1,2-bis(2-iodobenzyl)diselane 2d.** Yellow solid, m.p. 96-97 °C. <sup>1</sup>H NMR (400 MHz, CDCl<sub>3</sub>) δ 7.82 (d, *J* = 8.0 Hz, 2H), 7.30-7.27 (m, 2H), 7.21-7.19 (m, 2H), 6.93 (t, *J* = 7.4 Hz, 2H), 3.99 (s, 4H). <sup>13</sup>C NMR (101 MHz, CDCl<sub>3</sub>) δ 141.4, 139.7, 130.0, 128.7, 128.2, 100.5, 38.5. IR ν<sub>max</sub> (KBr, film, cm<sup>-1</sup>): 3356, 2922, 2851, 2372, 2320, 1658, 1632, 1467, 1435, 1362, 1010, 752. HRMS (APCI): calcd for C<sub>14</sub>H<sub>13</sub>I<sub>2</sub>Se<sub>2</sub><sup>+</sup> [M+H]<sup>+</sup>: 594.7432, found: 594.7428.

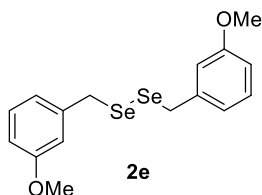

**1,2-bis(3-methoxybenzyl)diselane 2e.** Yellow oil.  $^1\text{H NMR}$  (300 MHz,  $\text{CDCl}_3$ )  $\delta$  7.21 (t,  $J = 7.7$  Hz, 2H), 6.84-6.78 (m, 6H), 3.83 (s, 4H), 3.81 (s, 6H).  $^{13}\text{C NMR}$  (126 MHz,  $\text{CDCl}_3$ )  $\delta$  159.6, 140.5, 129.4, 121.3, 114.5, 112.7, 55.2, 32.7. IR  $\nu_{\text{max}}$  (KBr, film,  $\text{cm}^{-1}$ ): 2998, 2936, 2833, 1598, 1584, 1486, 1465, 1452, 1436, 1294, 1264, 1152, 1044, 780, 734, 695. HRMS (APCI): calcd for  $\text{C}_{16}\text{H}_{17}\text{O}_2\text{Se}_2^+$   $[\text{M}+\text{H}]^+$ : 402.9710, found: 402.9706.

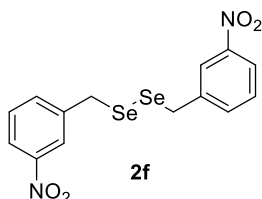

**1,2-bis(3-nitrobenzyl)diselane 2f.** Yellow solid, m.p. 108-109 °C.  $^1\text{H NMR}$  (400 MHz,  $\text{DMSO}-d_6$ )  $\delta$  8.10-8.05 (m, 4H), 7.67 (d,  $J = 7.6$  Hz, 2H), 7.59 (t,  $J = 7.6$  Hz, 2H), 4.12 (s, 4H).  $^{13}\text{C NMR}$  (101 MHz,  $\text{DMSO}-d_6$ )  $\delta$  147.5, 141.9, 135.5, 129.8, 123.3, 121.8, 29.6. IR  $\nu_{\text{max}}$  (KBr, film,  $\text{cm}^{-1}$ ): 3083, 2924, 1525, 1353, 1315, 1097, 1075, 807, 738, 684, 673. HRMS (APCI): calcd for  $\text{C}_{14}\text{H}_{13}\text{O}_4\text{N}_2\text{Se}_2^+$   $[\text{M}+\text{H}]^+$ : 432.9200, found: 432.9202.

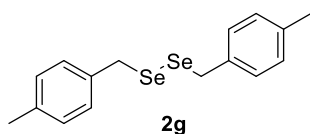

**1,2-bis(4-methylbenzyl)diselane 2g.** Yellow solid, m.p. 58-59 °C.  $^1\text{H NMR}$  (500 MHz,  $\text{CDCl}_3$ )  $\delta$  7.12 (s, 8H), 3.85 (s, 4H), 2.33 (s, 6H).  $^{13}\text{C NMR}$  (126 MHz,  $\text{CDCl}_3$ )  $\delta$  136.8, 135.9, 129.1, 128.9, 32.5, 21.2. IR  $\nu_{\text{max}}$  (KBr, film,  $\text{cm}^{-1}$ ): 3020, 2919, 2854, 1896, 1152, 1448, 1417, 1171, 814. HRMS (nano ESI): calcd for  $\text{C}_{16}\text{H}_{18}\text{Se}_2\text{Na}^+$   $[\text{M}+\text{Na}]^+$ : 392.9634, found: 392.9616.

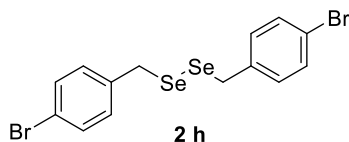

**1,2-bis(4-bromobenzyl)diselane 2h.** Yellow solid, m.p. 105-106 °C.  $^1\text{H NMR}$  (500 MHz,  $\text{CDCl}_3$ )  $\delta$  7.42 (d,  $J = 8.5$  Hz, 4H), 7.06 (d,  $J = 8.0$  Hz, 4H), 3.79 (s, 4H).  $^{13}\text{C NMR}$  (126 MHz,  $\text{CDCl}_3$ )  $\delta$  137.9, 131.6, 130.6, 121.0, 31.7. IR  $\nu_{\text{max}}$  (KBr, film,  $\text{cm}^{-1}$ ): 2923, 2850, 1900, 1527, 1483, 1399, 1352, 1168, 1070, 1009, 847, 819, 802, 475. HRMS (EI): calcd for  $\text{C}_{14}\text{H}_{12}\text{Br}_2\text{Se}_2^+$   $[\text{M}]^+$ : 497.7631, found: 497.7621.

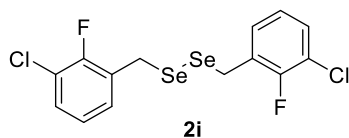

**1,2-bis(3-chloro-2-fluorobenzyl)diselane 2i.** Yellow solid, m.p. 54-55 °C.  $^1\text{H NMR}$  (400 MHz,  $\text{CDCl}_3$ )  $\delta$  7.30 (t,  $J = 7.4$  Hz, 2H), 7.05-7.00 (m, 4H), 3.92 (s, 4H).  $^{13}\text{C NMR}$  (101 MHz,  $\text{CDCl}_3$ )  $\delta$  156.1 (d,  $J = 251.5$  Hz), 129.6, 129.1 (d,  $J = 3.0$  Hz), 128.1 (d,  $J = 15.2$  Hz), 124.3 (d,  $J = 4.0$  Hz), 121.2 (d,  $J = 18.2$  Hz), 24.8 (d,  $J = 2.0$  Hz).  $^{19}\text{F NMR}$  (377 MHz,  $\text{CDCl}_3$ )  $\delta$  -118.7 (s). IR  $\nu_{\text{max}}$



(KBr, film,  $\text{cm}^{-1}$ ): 2921, 2850, 2320, 1468, 1458, 1229, 1189, 1170, 894, 778, 725. HRMS (EI): calcd for  $\text{C}_{14}\text{H}_{12}\text{F}_2\text{Cl}_2\text{Se}_2^+$   $[\text{M}]^+$ : 445.8453, found: 445.8444.

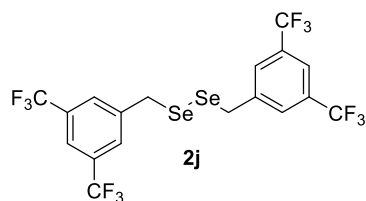

**1,2-bis(3,5-bis(trifluoromethyl)benzyl)diselane 2j.** Yellow solid, m.p. 62-63 °C.  $^1\text{H}$  NMR (400 MHz,  $\text{CDCl}_3$ )  $\delta$  7.78 (s, 2H), 7.61 (s, 4H), 3.86 (s, 4H).  $^{13}\text{C}$  NMR (101 MHz,  $\text{CDCl}_3$ )  $\delta$  141.1, 131.7 (q,  $J = 34.3$  Hz), 128.6 (q,  $J = 3.0$  Hz), 122.9 (q,  $J = 267.3$  Hz), 120.9 (q,  $J = 4.0$  Hz), 30.2.  $^{19}\text{F}$  NMR (377 MHz,  $\text{CDCl}_3$ )  $\delta$  -63.0 (s). IR  $\nu_{\text{max}}$  (KBr, film,  $\text{cm}^{-1}$ ): 3359, 3189, 2923, 2851, 1464, 1374, 1278, 1171, 1132, 923, 896, 857, 729, 704, 683. HRMS (APCI): calcd for  $\text{C}_{18}\text{H}_{19}\text{F}_{12}\text{Se}_2^+$   $[\text{M}+\text{H}]^+$ : 612.8849, found: 612.8842.

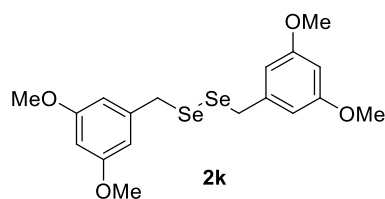

**1,2-bis(3,5-dimethoxybenzyl)diselane 2k.** Yellow solid, m.p. 53-54 °C.  $^1\text{H}$  NMR (500 MHz,  $\text{CDCl}_3$ )  $\delta$  6.40 (s, 4H), 6.36 (s, 2H), 3.83 (s, 4H), 3.79 (s, 12H).  $^{13}\text{C}$  NMR (126 MHz,  $\text{CDCl}_3$ )  $\delta$  160.7, 141.2, 106.9, 99.3, 55.3, 33.0. IR  $\nu_{\text{max}}$  (KBr, film,  $\text{cm}^{-1}$ ): 2998, 2937, 2835, 1595, 1462, 1429, 1345, 1322, 1297, 1206, 1156, 1059, 833, 694. HRMS (APCI): calcd for  $\text{C}_{18}\text{H}_{23}\text{O}_4\text{Se}_2^+$   $[\text{M}+\text{H}]^+$ : 462.9921, found: 462.9919.

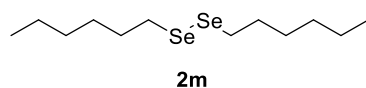

**1,2-dihexyldiselane 2m.** Yellow oil.  $^1\text{H}$  NMR (400 MHz,  $\text{CDCl}_3$ )  $\delta$  2.91 (t,  $J = 7.4$  Hz, 4H), 1.76-1.69 (m, 4H), 1.41-1.26 (m, 12H), 0.89 (t,  $J = 6.6$  Hz, 6H).  $^{13}\text{C}$  NMR (101 MHz,  $\text{CDCl}_3$ )  $\delta$  31.3, 31.0, 30.3, 29.2, 22.6, 14.0. IR  $\nu_{\text{max}}$  (KBr, film,  $\text{cm}^{-1}$ ): 2956, 2925, 2854, 1466, 1378, 1227, 1183, 723. HRMS (EI): calcd for  $\text{C}_{12}\text{H}_{26}\text{Se}_2^+$   $[\text{M}+\text{H}]^+$ : 330.0359, found: 330.0357.

### 3. Optimizaition of reaction conditions

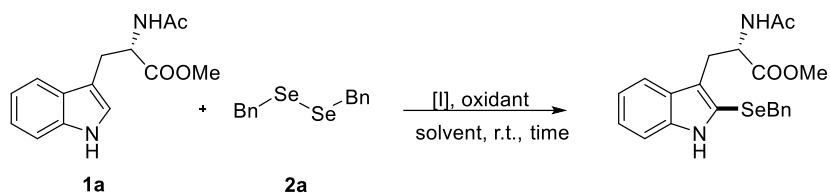

| Entry            | [I] (equiv.)                                     | Oxidant (equiv.)                         | solvent                               | time   | Yield (%) |
|------------------|--------------------------------------------------|------------------------------------------|---------------------------------------|--------|-----------|
| 1 <sup>b</sup>   | TBAI (0.1)                                       | 35% H <sub>2</sub> O <sub>2</sub> (1.02) | CH <sub>3</sub> CN                    | 24 h   | 31        |
| 2 <sup>b</sup>   | TBAI (0.1)                                       | 35% H <sub>2</sub> O <sub>2</sub> (1.02) | H <sub>2</sub> O                      | 24 h   | N. R.     |
| 3 <sup>c</sup>   | TBAI (0.1)                                       | 35% H <sub>2</sub> O <sub>2</sub> (1.02) | H <sub>2</sub> O + CH <sub>3</sub> CN | 24 h   | trace     |
| 4 <sup>b</sup>   | TBAI (0.1)                                       | 35% H <sub>2</sub> O <sub>2</sub> (2.04) | CH <sub>3</sub> CN                    | 19 h   | 41        |
| 5 <sup>b</sup>   | TBAI (1.0)                                       | 35% H <sub>2</sub> O <sub>2</sub> (1.02) | CH <sub>3</sub> CN                    | 24 h   | N. R.     |
| 6 <sup>b</sup>   | TBAI (1.0)                                       | 35% H <sub>2</sub> O <sub>2</sub> (2.04) | CH <sub>3</sub> CN                    | 24 h   | N. R.     |
| 7 <sup>b</sup>   | TBAI (0.1)                                       | 35% H <sub>2</sub> O <sub>2</sub> (2.04) | DCM                                   | 24 h   | 42        |
| 8 <sup>b</sup>   | TBAI (0.1)                                       | 35% H <sub>2</sub> O <sub>2</sub> (2.04) | THF                                   | 24 h   | 6         |
| 9 <sup>b</sup>   | TBAI (0.1)                                       | 35% H <sub>2</sub> O <sub>2</sub> (2.04) | EA                                    | 24 h   | 47        |
| 10 <sup>b</sup>  | TBAI (0.1)                                       | 35% H <sub>2</sub> O <sub>2</sub> (2.04) | MeOH                                  | 24 h   | 21        |
| 11 <sup>b</sup>  | TBAI (0.1)                                       | 35% H <sub>2</sub> O <sub>2</sub> (2.04) | DMF                                   | 24 h   | N. R.     |
| 12 <sup>d</sup>  | KI (0.1)                                         | Oxone (1.00)                             | H <sub>2</sub> O + CH <sub>3</sub> CN | 1 h    | 56        |
| 13 <sup>d</sup>  | KI (0.2)                                         | Oxone (1.00)                             | H <sub>2</sub> O + CH <sub>3</sub> CN | 1 h    | 53        |
| 14 <sup>d</sup>  | KI (0.05)                                        | Oxone (1.00)                             | H <sub>2</sub> O + CH <sub>3</sub> CN | 1 h    | 49        |
| 15 <sup>d</sup>  | TBAI (0.05)                                      | Oxone (1.00)                             | H <sub>2</sub> O + CH <sub>3</sub> CN | 1 h    | 59        |
| 16 <sup>d</sup>  | NaI (0.05)                                       | Oxone (1.00)                             | H <sub>2</sub> O + CH <sub>3</sub> CN | 1 h    | 55        |
| 17 <sup>d</sup>  | KI (0.05)                                        | Oxone (0.75)                             | H <sub>2</sub> O + CH <sub>3</sub> CN | 1 h    | 54        |
| 18 <sup>d</sup>  | KI (0.05)                                        | Oxone (0.50)                             | H <sub>2</sub> O + CH <sub>3</sub> CN | 1 h    | 54        |
| 19 <sup>e</sup>  | TBAI (0.05)                                      | Oxone (1.00)                             | H <sub>2</sub> O                      | 1 h    | N. D.     |
| 20 <sup>e</sup>  | TBAI (0.05)                                      | Oxone (1.00)                             | CH <sub>3</sub> CN                    | 1 h    | 43        |
| 21 <sup>e</sup>  | TBAI (0.05)                                      | Oxone (1.00)                             | DMSO                                  | 20 min | 85        |
| 22 <sup>e</sup>  | TBAI (0.05)                                      | Oxone (1.00)                             | DMF                                   | 20 min | 69        |
| 23 <sup>e</sup>  | TBAI (0.05)                                      | Oxone (1.00)                             | MeOH                                  | 15 min | 31        |
| 24 <sup>ef</sup> | TBAI (0.05)                                      | Oxone (1.00)                             | DMSO                                  | 8 min  | 94        |
| 25 <sup>ef</sup> | <i>n</i> -Bu <sub>4</sub> NI <sub>3</sub> (0.05) | Oxone (1.00)                             | DMSO                                  | 10 min | 89        |
| 26 <sup>ef</sup> | TBAI (0.05)                                      | O <sub>2</sub> (1 atm)                   | DMSO                                  | 24 h   | N. R.     |

<sup>a</sup> Unless noted otherwise, all the reactions were conducted with *L*-methyl acetyl-tryptophanate (0.1 mmol), dibenzyl diselenide (0.1 mmol), catalyst, oxidant in solvent. Isolated yields were given. <sup>b</sup> 0.5 mL solvent. <sup>c</sup> Solvent: 0.25 mL CH<sub>3</sub>CN and 0.25 mL H<sub>2</sub>O. <sup>d</sup> Solvent: 0.5 mL CH<sub>3</sub>CN and 0.05 mL H<sub>2</sub>O. <sup>e</sup> 0.55 mL solvent. <sup>f</sup> Quenched by 1 mL saturated Na<sub>2</sub>S<sub>2</sub>O<sub>3</sub> (aq.) before purification.

#### 4. General procedure for synthesis of 3, 4 and 5

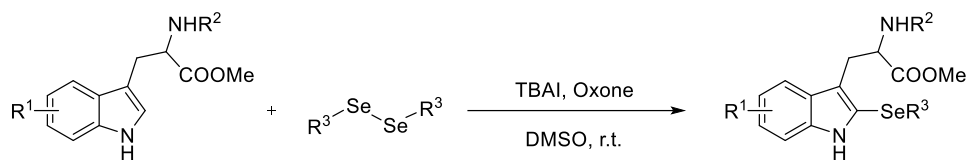

*General procedure:* To the mixture of acetyl tryptophanate (0.1 mmol), diselenide (0.1 mmol) and TBAI (5 mol%) was added DMSO (0.55 mL). And then oxone (0.1 mmol) was added in one portion. The reaction was stirred at room temperature until the acetyl tryptophanate totally disappeared (monitored by TLC). Saturated sodium thiosulfate (1 mL) was added to quench the reaction. The reaction was diluted with ethyl acetate (5 mL) and washed by H<sub>2</sub>O (20 mL). Aqueous phase was extracted with ethyl acetate (5 mL × 2). The organic layer was combined, ethyl acetate was removed by rotary evaporator and the crude product was purified by silica column chromatography (elute: petroleum ether / ethyl acetate 1/3) to afford the desired products **3/4**.

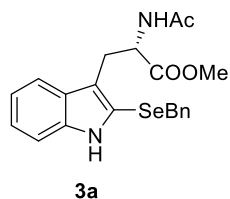

**methyl (S)-2-acetamido-3-(2-(benzylselanyl)-1H-indol-3-yl)propanoate 3a.** Yellow solid, 40.2 mg (from 0.1 mmol), 94% yield, > 99.9% ee, m.p. 55-57 °C.  $[\alpha]_D^{28} = 20.4$  (c 0.25, CHCl<sub>3</sub>) <sup>1</sup>H NMR (300 MHz, CDCl<sub>3</sub>) δ 7.94 (s, 1H), 7.51 (d, *J* = 7.8 Hz, 1H), 7.22-7.17 (m, 5H), 7.14-7.09 (m, 1H), 7.04-7.01 (m, 2H), 6.00 (d, *J* = 7.6 Hz, 1H), 4.84 (dd, *J* = 13.8, 6.0 Hz, 1H), 3.92 (s, 2H), 3.66 (s, 3H), 3.22-3.06 (m, 2H), 1.91 (s, 3H). <sup>13</sup>C NMR (101 MHz, CDCl<sub>3</sub>) δ 172.4, 169.7, 138.6, 137.4, 128.7, 128.6, 127.7, 127.1, 123.0, 120.9, 119.8, 118.7, 117.1, 110.7, 52.9, 52.4, 33.5, 27.9, 23.2. IR  $\nu_{\max}$  (KBr, film, cm<sup>-1</sup>): 3272, 3059, 2950, 2854, 1738, 1657, 1517, 1494, 1436, 1373, 1340, 1216, 743, 697. HRMS (ESI): calcd for C<sub>20</sub>H<sub>19</sub>O<sub>3</sub>N<sub>2</sub>Se<sup>+</sup> [M-H]<sup>+</sup>: 429.0723, found: 429.0730. The enantiomeric excess was determined by HPLC on the Chiralpak IA column connected in series (*n*-Hexane : isopropanol = 80 : 1, flowing rate = 1.0 mL/min, 25 °C, UV detection at  $\lambda = 254$  nm), *t*<sub>R</sub> = 16.2 min.

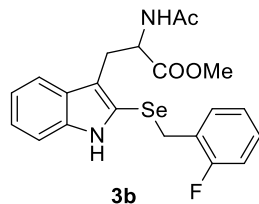

**methyl 2-acetamido-3-(2-((2-fluorobenzyl)selanyl)-1H-indol-3-yl)propanoate 3b.** Pale yellow solid, 38.5 mg (from 0.1 mmol), 86% yield, m.p. 52-54 °C. <sup>1</sup>H NMR (400 MHz, CDCl<sub>3</sub>) δ 8.14 (s, 1H), 7.51 (d, *J* = 8.0 Hz, 1H), 7.23 (s, 1H), 7.19-7.16 (m, 2H), 7.10 (t, *J* = 7.4 Hz, 1H), 6.97 (t, *J* = 9.2 Hz, 1H), 6.89 (t, *J* = 7.4 Hz, 1H), 6.81 (t, *J* = 7.6 Hz, 1H), 5.99 (d, *J* = 7.6 Hz, 1H), 4.84 (dd, *J* = 12.8, 6.0 Hz, 1H), 3.92 (s, 2H), 3.67 (s, 3H), 3.52 (s, 1H), 3.19-3.03 (m, 2H), 1.90 (s, 3H). <sup>13</sup>C NMR (101 MHz, CDCl<sub>3</sub>) δ 172.3, 169.6, 160.45 (d, *J* = 248.5 Hz), 137.4, 130.6 (d, *J* = 4.0 Hz), 129.0 (d, *J* = 8.0 Hz), 127.7, 126.0 (d, *J* = 14.1 Hz), 124.0 (d, *J* = 4.0 Hz), 123.1, 120.6, 119.9, 118.8, 117.5, 115.4 (d, *J* = 21.2 Hz), 110.8, 52.8, 52.4, 27.8, 26.0 (d, *J* = 3.0 Hz), 23.2. <sup>19</sup>F NMR (377 MHz, CDCl<sub>3</sub>) δ -117.3 (s). IR  $\nu_{\max}$  (KBr, film, cm<sup>-1</sup>): 3271, 3059, 2950, 2922, 2850, 1738, 1657, 1520, 1491, 1437, 1374, 1340, 1233, 1216, 858, 745. HRMS (ESI): calcd for C<sub>21</sub>H<sub>21</sub>O<sub>3</sub>N<sub>2</sub>FNase<sup>+</sup> [M+Na]<sup>+</sup>: 471.0594, found: 471.0591.

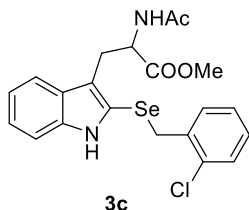

**methyl 2-acetamido-3-(2-((2-chlorobenzyl)selanyl)-1H-indol-3-yl)propanoate 3c.** Pale yellow solid, 33.6 mg (from 0.1 mmol), 72% yield, m.p. 62-63 °C.  $^1\text{H NMR}$  (400 MHz,  $\text{CDCl}_3$ )  $\delta$  7.95 (s, 1H), 7.51 (d,  $J = 8.0$  Hz, 1H), 7.35 (d,  $J = 8.0$  Hz, 1H), 7.24 (s, 1H), 7.21-7.09 (m, 3H), 6.98 (t,  $J = 7.2$  Hz, 1H), 6.75 (d,  $J = 7.6$  Hz, 1H), 5.95 (d,  $J = 6.8$  Hz, 1H), 4.83 (dd,  $J = 13.2, 6.0$  Hz, 1H), 4.00 (s, 2H), 3.67 (s, 3H), 3.18-3.00 (m, 2H), 1.90 (s, 3H).  $^{13}\text{C NMR}$  (101 MHz,  $\text{CDCl}_3$ )  $\delta$  172.3, 169.6, 137.3, 136.4, 133.7, 130.4, 129.8, 128.6, 127.8, 126.7, 123.2, 120.5, 120.0, 118.9, 117.8, 110.7, 52.8, 52.4, 31.3, 27.9, 23.2. IR  $\nu_{\text{max}}$  (KBr, film,  $\text{cm}^{-1}$ ): 3264, 3056, 2950, 2921, 2849, 1738, 1658, 1521, 1444, 1374, 1340, 1215, 1052, 1033, 745. HRMS (ESI): calcd for  $\text{C}_{21}\text{H}_{20}\text{O}_3\text{N}_2\text{ClSe}^+$   $[\text{M}-\text{H}]^+$ : 463.0333, found: 463.0329.

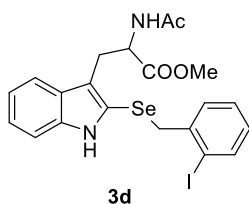

**methyl 2-acetamido-3-(2-((2-iodobenzyl)selanyl)-1H-indol-3-yl)propanoate 3d.** Pale yellow solid, 49.2 mg (from 0.1 mmol), 89% yield, m.p. 67-69 °C.  $^1\text{H NMR}$  (400 MHz,  $\text{CDCl}_3$ )  $\delta$  7.97 (s, 1H), 7.83 (d,  $J = 7.6$  Hz, 1H), 7.51 (d,  $J = 7.6$  Hz, 1H), 7.19 (t,  $J = 7.6$  Hz, 1H), 7.08 (dt,  $J = 22.8, 7.6$  Hz, 2H), 6.89 (t,  $J = 7.6$  Hz, 1H), 6.75 (d,  $J = 7.6$  Hz, 1H), 5.96 (d,  $J = 7.6$  Hz, 1H), 4.83 (dd,  $J = 13.2, 6.0$  Hz, 1H), 4.02 (s, 2H), 3.68 (s, 3H), 3.17-2.99 (m, 2H), 1.91 (s, 3H).  $^{13}\text{C NMR}$  (101 MHz,  $\text{CDCl}_3$ )  $\delta$  172.3, 169.6, 141.0, 139.8, 137.4, 129.6, 128.8, 128.2, 127.8, 123.2, 120.4, 120.0, 118.9, 117.9, 110.8, 100.3, 52.8, 52.4, 39.4, 27.9, 23.2. IR  $\nu_{\text{max}}$  (KBr, film,  $\text{cm}^{-1}$ ): 3271, 3055, 2923, 2851, 1737, 1655, 1520, 1436, 1374, 1340, 1215, 1011, 744. HRMS (ESI): calcd for  $\text{C}_{21}\text{H}_{20}\text{O}_3\text{N}_2\text{ISe}^+$   $[\text{M}-\text{H}]^+$ : 554.9689, found: 554.9686.

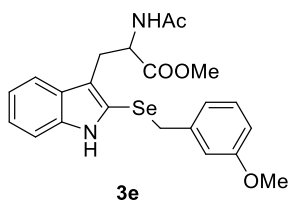

**methyl 2-acetamido-3-(2-((3-methoxybenzyl)selanyl)-1H-indol-3-yl)propanoate 3e.** Pale yellow solid, 42.6 mg (from 0.1 mmol), 93% yield, m.p. 48-50 °C.  $^1\text{H NMR}$  (400 MHz,  $\text{CDCl}_3$ )  $\delta$  7.87 (s, 1H), 7.51 (d,  $J = 7.6$  Hz, 1H), 7.24-7.22 (m, 1H), 7.19-7.08 (m, 3H), 6.75 (d,  $J = 8.0$  Hz, 1H), 6.67 (d,  $J = 7.2$  Hz, 1H), 6.47 (s, 1H), 5.97 (d,  $J = 6.8$  Hz, 1H), 4.84 (dd,  $J = 12.4, 6.4$  Hz, 1H), 3.89 (s, 2H), 3.67 (s, 3H), 3.55 (s, 3H), 3.24-3.11 (m, 2H), 1.91 (s, 3H).  $^{13}\text{C NMR}$  (101 MHz,  $\text{CDCl}_3$ )  $\delta$  172.3, 169.6, 159.5, 140.1, 137.3, 129.5, 127.8, 123.0, 120.1, 120.9, 119.9, 118.7, 117.2, 113.6, 113.3, 110.7, 55.0, 52.9, 52.4, 33.4, 27.9, 23.2. IR  $\nu_{\text{max}}$  (KBr, film,  $\text{cm}^{-1}$ ): 3268, 3054, 2916, 2849, 1743, 1659, 1599, 1517, 1488, 1437, 1374, 1340, 1265, 1215, 1040, 738, 697. HRMS (ESI): calcd for  $\text{C}_{22}\text{H}_{23}\text{O}_4\text{N}_2\text{Se}^+$   $[\text{M}-\text{H}]^+$ : 459.0829, found: 459.0826.

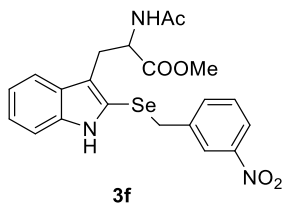

**methyl 2-acetamido-3-(2-((3-nitrobenzyl)selanyl)-1H-indol-3-yl)propanoate 3f.** Yellow solid, 43.5 mg (from 0.1 mmol), 92% yield, m.p. 64-66 °C.  $^1\text{H}$  NMR (400 MHz,  $\text{CDCl}_3$ )  $\delta$  8.04-8.01 (m, 2H), 7.88 (s, 1H), 7.49 (d,  $J$  = 8.0 Hz, 1H), 7.31 (t,  $J$  = 8.0 Hz, 1H), 7.24 -7.18 (m, 3H), 7.11 (t,  $J$  = 7.2 Hz, 1H), 5.95 (d,  $J$  = 7.6 Hz, 1H), 4.84 (dd,  $J$  = 13.0, 6.2 Hz, 1H), 3.99 (s, 2H), 3.65 (s, 3H), 3.16-3.02 (m, 2H), 1.91 (s, 3H).  $^{13}\text{C}$  NMR (101 MHz,  $\text{CDCl}_3$ )  $\delta$  172.2, 169.6, 148.1, 140.8, 137.4, 134.6, 129.3, 127.7, 123.6, 123.5, 122.0, 120.2, 119.5, 118.9, 118.2, 110.8, 52.8, 52.4, 32.1, 28.1, 23.2. IR  $\nu_{\text{max}}$  (KBr, film,  $\text{cm}^{-1}$ ): 3263, 3059, 2922, 2850, 1737, 1657, 1527, 1436, 1349, 1216, 810, 739, 686. HRMS (ESI): calcd for  $\text{C}_{21}\text{H}_{20}\text{O}_5\text{N}_3\text{Se}^+$   $[\text{M}-\text{H}]^+$ : 474.0574, found: 474.0570.

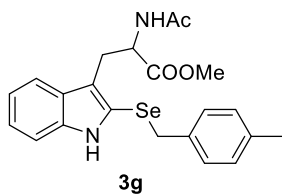

**methyl 2-acetamido-3-(2-((4-methylbenzyl)selanyl)-1H-indol-3-yl)propanoate 3g.** Pale yellow solid, 35.4 mg (from 0.1 mmol), 80% yield, m.p. 56-57 °C.  $^1\text{H}$  NMR (400 MHz,  $\text{CDCl}_3$ )  $\delta$  7.84 (s, 1H), 7.52 (d,  $J$  = 7.6 Hz, 1H), 7.23-7.15 (m, 2H), 7.10 (t,  $J$  = 7.4 Hz, 1H), 7.02 (d,  $J$  = 7.6 Hz, 2H), 6.94 (d,  $J$  = 7.6 Hz, 2H), 5.97 (d,  $J$  = 7.2 Hz, 1H), 4.85 (dd,  $J$  = 13.0, 6.2 Hz, 1H), 3.91 (s, 2H), 3.67 (s, 3H), 3.25-3.12 (m, 2H), 2.32 (s, 3H), 1.91 (s, 3H).  $^{13}\text{C}$  NMR (101 MHz,  $\text{CDCl}_3$ )  $\delta$  172.3, 169.6, 137.3, 137.0, 135.6, 129.2, 128.6, 127.8, 123.0, 121.2, 119.9, 118.8, 117.0, 110.7, 52.9, 52.4, 33.4, 28.0, 23.2, 21.1. IR  $\nu_{\text{max}}$  (KBr, film,  $\text{cm}^{-1}$ ): 3269, 3051, 2923, 2851, 1737, 1655, 1513, 1437, 1374, 1340, 1216, 817, 742. HRMS (ESI): calcd for  $\text{C}_{22}\text{H}_{23}\text{O}_3\text{N}_2\text{Se}^+$   $[\text{M}-\text{H}]^+$ : 443.0879, found: 443.0878.

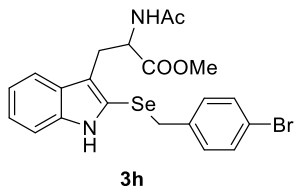

**methyl 2-acetamido-3-(2-((4-bromobenzyl)selanyl)-1H-indol-3-yl)propanoate 3h.** Pale yellow solid, 45.3 mg (from 0.1 mmol), 89% yield, m.p. 68-69 °C.  $^1\text{H}$  NMR (400 MHz,  $\text{CDCl}_3$ )  $\delta$  7.93 (s, 1H), 7.52 (d,  $J$  = 7.6 Hz, 1H), 7.30 (d,  $J$  = 7.6 Hz, 2H), 7.24 (s, 1H), 7.19 (t,  $J$  = 7.6 Hz, 1H), 7.11 (t,  $J$  = 7.4 Hz, 1H), 6.87 (d,  $J$  = 8.0 Hz, 2H), 5.96 (d,  $J$  = 7.6 Hz, 1H), 4.86 (dd,  $J$  = 13.0, 6.2 Hz, 1H), 3.86 (s, 2H), 3.66 (s, 3H), 3.21-3.07 (m, 2H), 1.91 (s, 3H).  $^{13}\text{C}$  NMR (101 MHz,  $\text{CDCl}_3$ )  $\delta$  172.3, 169.6, 137.8, 137.3, 131.6, 130.3, 127.7, 123.2, 121.0, 120.4, 120.0, 118.8, 117.6, 110.8, 52.8, 52.4, 32.7, 28.0, 23.2. IR  $\nu_{\text{max}}$  (KBr, film,  $\text{cm}^{-1}$ ): 3270, 3056, 2917, 2849, 1737, 1655, 1521, 1486, 1437, 1374, 1340, 1216, 1011, 744. HRMS (ESI): calcd for  $\text{C}_{21}\text{H}_{20}\text{O}_3\text{N}_2\text{BrSe}^+$   $[\text{M}-\text{H}]^+$ : 506.9828, found: 506.9822.

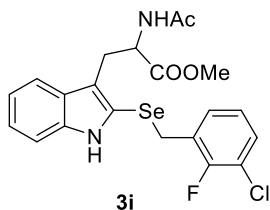

**methyl 2-acetamido-3-(2-((3-chloro-2-fluorobenzyl)selenanyl)-1H-indol-3-yl)propanoate 3i.** Pale yellow solid, 42.4 mg (from 0.1 mmol), 88% yield, m.p. 59-61 °C.  $^1\text{H}$  NMR (400 MHz,  $\text{CDCl}_3$ )  $\delta$  8.02 (s, 1H), 7.52 (d,  $J$  = 8.0 Hz, 1H), 7.28 (s, 1H), 7.24-7.18 (m, 2H), 7.10 (t,  $J$  = 7.2 Hz, 1H), 6.82 (t,  $J$  = 7.6 Hz, 1H), 6.68 (t,  $J$  = 7.0 Hz, 1H), 5.95 (d,  $J$  = 7.2 Hz, 1H), 4.85 (dd,  $J$  = 12.4, 6.0 Hz, 1H), 3.92 (s, 2H), 3.67 (s, 3H), 3.21-3.04 (m, 2H), 1.90 (s, 3H).  $^{13}\text{C}$  NMR (101 MHz,  $\text{CDCl}_3$ )  $\delta$  172.3, 169.6, 155.9 (d,  $J$  = 250.5 Hz), 137.4, 129.5, 128.7 (d,  $J$  = 3.0 Hz), 127.9 (d,  $J$  = 15.2 Hz), 127.7, 124.3 (d,  $J$  = 5.1 Hz), 123.3, 121.2 (d,  $J$  = 17.2 Hz), 120.1, 120.0, 118.9, 117.8, 110.8, 52.8, 52.4, 28.0, 25.9 (d,  $J$  = 2.0 Hz), 23.2.  $^{19}\text{F}$  NMR (377 MHz,  $\text{CDCl}_3$ )  $\delta$  -119.0 (s). IR  $\nu_{\text{max}}$  (KBr, film,  $\text{cm}^{-1}$ ): 3271, 3056, 2952, 2925, 2848, 1734, 1655, 1516, 1459, 1436, 1373, 1340, 1216, 895, 784, 743, 728. HRMS (ESI): calcd for  $\text{C}_{21}\text{H}_{19}\text{O}_3\text{N}_2\text{FClSe}^+$  [M-H] $^+$ : 481.0239, found: 481.0234.

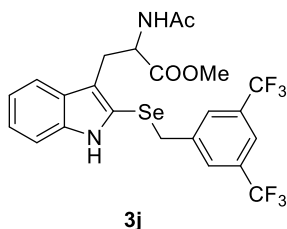

**methyl 2-acetamido-3-(2-((3,5-bis(trifluoromethyl)benzyl)selenanyl)-1H-indol-3-yl)propanoate 3j.** Pale yellow solid, 47.7 mg (from 0.1 mmol), 84% yield, m.p. 54-56 °C.  $^1\text{H}$  NMR (400 MHz,  $\text{CDCl}_3$ )  $\delta$  8.05 (s, 1H), 7.66 (s, 1H), 7.48 (d,  $J$  = 8.0 Hz, 1H), 7.34 (s, 2H), 7.24-7.17 (m, 2H), 7.11 (t,  $J$  = 7.2 Hz, 1H), 5.95 (d,  $J$  = 7.6 Hz, 1H), 4.85 (dd,  $J$  = 13.0, 6.2 Hz, 1H), 3.98 (s, 2H), 3.65 (s, 3H), 3.11-2.95 (m, 2H), 1.89 (s, 3H).  $^{13}\text{C}$  NMR (101 MHz,  $\text{CDCl}_3$ )  $\delta$  172.3, 169.6, 141.4, 137.4, 131.6 (q,  $J$  = 33.7 Hz), 128.6 (q,  $J$  = 3.7 Hz), 127.6, 123.6, 123.0 (q,  $J$  = 274.0 Hz), 120.7 (q,  $J$  = 3.7 Hz), 120.2, 118.9, 118.8, 118.2, 110.9, 52.9, 52.4, 31.7, 28.0, 23.1.  $^{19}\text{F}$  NMR (377 MHz,  $\text{CDCl}_3$ )  $\delta$  -63.0 (s). IR  $\nu_{\text{max}}$  (KBr, film,  $\text{cm}^{-1}$ ): 3263, 2915, 2850, 1737, 1659, 1521, 1438, 1375, 1278, 1173, 1134, 895, 744, 704, 683. HRMS (ESI): calcd for  $\text{C}_{23}\text{H}_{19}\text{O}_3\text{N}_2\text{F}_6\text{Se}^+$  [M-H] $^+$ : 565.0471, found: 565.0466.

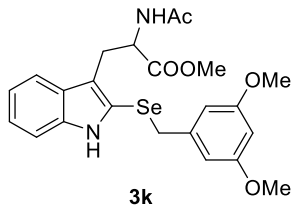

**methyl 2-acetamido-3-(2-((3,5-dimethoxybenzyl)selenanyl)-1H-indol-3-yl)propanoate 3k.** Pale yellow solid, 44.1 mg (from 0.1 mmol), 90% yield, m.p. 55-57 °C.  $^1\text{H}$  NMR (300 MHz,  $\text{CDCl}_3$ )  $\delta$  7.99 (s, 1H), 7.51 (d,  $J$  = 7.8 Hz, 1H), 7.24-7.07 (m, 3H), 6.30 (s, 1H), 6.13 (d,  $J$  = 2.1 Hz, 2H), 6.00 (d,  $J$  = 7.8 Hz, 1H), 4.85 (dd,  $J$  = 13.6, 5.9 Hz, 1H), 3.84 (s, 2H), 3.67 (s, 3H), 3.55 (s, 6H), 3.28-3.13 (m, 2H), 1.91 (s, 3H).  $^{13}\text{C}$  NMR (101 MHz,  $\text{CDCl}_3$ )  $\delta$  172.3, 169.6, 160.7, 140.9, 137.3, 127.8, 123.1, 120.9, 119.9, 118.7, 117.2, 110.7, 106.3, 99.7, 55.1, 52.9, 52.4, 33.6, 28.0, 23.2. IR  $\nu_{\text{max}}$  (KBr, film,  $\text{cm}^{-1}$ ): 3271, 3000, 2923, 2849, 1743, 1657, 1595, 1520, 1459, 1430, 1340, 1205, 1152, 1059, 836, 745, 695. HRMS (ESI): calcd for  $\text{C}_{23}\text{H}_{25}\text{O}_5\text{N}_2\text{Se}^+$  [M-H] $^+$ : 489.0934, found: 489.0934.

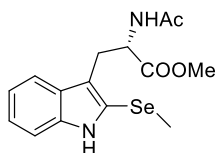

3l

**methyl (S)-2-acetamido-3-(2-(methylselanyl)-1H-indol-3-yl)propanoate 3l.** Yellow solid, 27.9 mg (from 0.1 mmol), 79% yield, m.p. 52-54 °C.  $[\alpha]_D^{28} = 45.6$  (c 0.25, CHCl<sub>3</sub>). <sup>1</sup>H NMR (400 MHz, CDCl<sub>3</sub>) δ 8.38 (s, 1H), 7.51 (d, *J* = 7.6 Hz, 1H), 7.29 (d, *J* = 8.4 Hz, 1H), 7.17 (t, *J* = 7.4 Hz, 1H), 7.10 (t, *J* = 7.4 Hz, 1H), 6.10 (d, *J* = 7.4 Hz, 1H), 4.92 (dd, *J* = 13.4, 5.8 Hz, 1H), 3.69 (s, 3H), 3.43-3.31 (m, 2H), 2.23 (s, 3H), 1.94 (s, 3H). <sup>13</sup>C NMR (101 MHz, CDCl<sub>3</sub>) δ 172.4, 169.7, 137.3, 127.9, 122.8, 121.9, 119.9, 118.5, 115.5, 110.7, 53.0, 52.4, 28.2, 23.2, 9.7. IR  $\nu_{\max}$  (KBr, film, cm<sup>-1</sup>): 3271, 3056, 2928, 2852, 1737, 1657, 1525, 1436, 1374, 1340, 1265, 1216, 1010, 802, 743. HRMS (ESI): calcd for C<sub>15</sub>H<sub>17</sub>O<sub>3</sub>N<sub>2</sub>Se<sup>+</sup> [M-H]<sup>+</sup>: 353.0410, found: 353.0417.

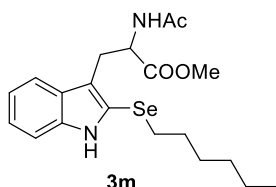

3m

**methyl 2-acetamido-3-(2-(hexylselanyl)-1H-indol-3-yl)propanoate 3m.** Orange oil, 34.0 mg (from 0.1 mmol), 80% yield. <sup>1</sup>H NMR (400 MHz, CDCl<sub>3</sub>) δ 8.40 (s, 1H), 7.52 (d, *J* = 7.6 Hz, 1H), 7.29 (d, *J* = 8.0 Hz, 1H), 7.17 (t, *J* = 7.4 Hz, 1H), 7.10 (t, *J* = 7.4 Hz, 1H), 6.11 (d, *J* = 7.4 Hz, 1H), 4.91 (dd, *J* = 12.2, 5.4 Hz, 1H), 3.69 (s, 3H), 3.41-3.33 (m, 2H), 2.75 (t, *J* = 7.4 Hz, 2H), 1.94 (s, 3H), 1.63-1.56 (m, 2H), 1.37-1.20 (m, 6H), 0.85 (t, *J* = 6.4 Hz, 3H). <sup>13</sup>C NMR (101 MHz, CDCl<sub>3</sub>) δ 172.4, 169.7, 137.3, 127.8, 122.8, 121.2, 119.8, 118.5, 116.2, 110.7, 53.0, 52.4, 31.2, 30.6, 30.0, 29.3, 28.2, 23.2, 22.5, 14.0. IR  $\nu_{\max}$  (KBr, film, cm<sup>-1</sup>): 3271, 3057, 2955, 2926, 2854, 1737, 1657, 1521, 1436, 1374, 1340, 1261, 1216, 1011, 799, 743. HRMS (ESI): calcd for C<sub>20</sub>H<sub>28</sub>O<sub>3</sub>N<sub>2</sub>NaSe<sup>+</sup> [M+Na]<sup>+</sup>: 447.1157, found: 447.1164.

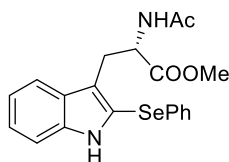

3n

**methyl (S)-2-acetamido-3-(2-(phenylselanyl)-1H-indol-3-yl)propanoate 3n.** Pale yellow solid, 31.5 mg (from 0.1 mmol), 76% yield, m.p. 65-66 °C.  $[\alpha]_D^{28} = 38.8$  (c 0.25, CHCl<sub>3</sub>). <sup>1</sup>H NMR (400 MHz, CDCl<sub>3</sub>) δ 8.32 (s, 1H), 7.60 (d, *J* = 8.0 Hz, 1H), 7.31 (d, *J* = 8.0 Hz, 1H), 7.24-7.20 (m, 6H), 7.14 (t, *J* = 7.6 Hz, 1H), 5.99 (d, *J* = 7.6 Hz, 1H), 4.91 (dd, *J* = 13.4, 5.8 Hz, 1H), 3.68 (s, 3H), 3.46-3.33 (m, 2H), 1.78 (s, 3H). <sup>13</sup>C NMR (101 MHz, CDCl<sub>3</sub>) δ 172.3, 169.8, 137.7, 131.4, 129.6, 129.6, 127.8, 126.9, 123.4, 120.1, 119.8, 119.0, 117.6, 111.0, 52.9, 52.4, 28.2, 23.0. IR  $\nu_{\max}$  (KBr, film, cm<sup>-1</sup>): 3261, 3056, 2924, 2853, 1734, 1657, 1517, 1477, 1438, 1374, 1340, 1218, 1021, 799, 737, 689. HRMS (ESI): calcd for C<sub>20</sub>H<sub>19</sub>O<sub>3</sub>N<sub>2</sub>Se<sup>+</sup> [M-H]<sup>+</sup>: 415.0566, found: 415.0577.

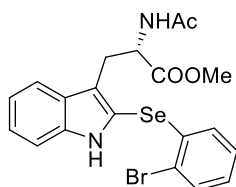

3o

**methyl (S)-2-acetamido-3-(2-((2-bromophenyl)selanyl)-1H-indol-3-yl)propanoate 3o.** Yellow solid, 15.7 mg (from 0.1

mmol), 32% yield, m.p. 80-81 °C.  $[\alpha]_D^{28} = 37.6$  (c 0.125, CHCl<sub>3</sub>). <sup>1</sup>H NMR (400 MHz, CDCl<sub>3</sub>)  $\delta$  8.41 (s, 1H), 7.65 (d,  $J = 8.0$  Hz, 1H), 7.49-7.47 (m, 1H), 7.36 (d,  $J = 8.4$  Hz, 1H), 7.27-7.25 (m, 1H), 7.18 (t,  $J = 7.4$  Hz, 1H), 7.06-7.00 (m, 2H), 6.59-6.56 (m, 1H), 5.99 (d,  $J = 7.6$  Hz, 1H), 4.92 (dd,  $J = 13.4, 5.8$  Hz, 1H), 3.68 (s, 3H), 3.46-3.30 (m, 2H), 1.77 (s, 3H). <sup>13</sup>C NMR (101 MHz, CDCl<sub>3</sub>)  $\delta$  172.2, 169.8, 138.0, 135.4, 132.8, 129.0, 128.3, 127.9, 127.6, 123.9, 121.8, 120.3, 119.4, 119.3, 119.0, 111.2, 52.9, 52.5, 28.2, 23.0. IR  $\nu_{\max}$  (KBr, film, cm<sup>-1</sup>): 3261, 3055, 2950, 2923, 2850, 1737, 1657, 1521, 1441, 1374, 1341, 1218, 1010, 744. HRMS (ESI): calcd for C<sub>20</sub>H<sub>18</sub>O<sub>3</sub>N<sub>2</sub>BrSe<sup>+</sup> [M-H]<sup>+</sup>: 492.9672, found: 492.9681.

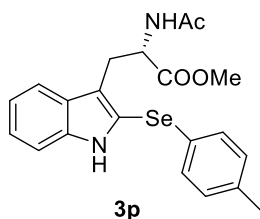

**methyl (S)-2-acetamido-3-(2-(*p*-tolylselanyl)-1*H*-indol-3-yl)propanoate 3p.** Pale yellow solid, 26.6 mg (from 0.1 mmol), 62% yield, m.p. 65-66 °C.  $[\alpha]_D^{28} = 42.9$  (c 0.245, CHCl<sub>3</sub>). <sup>1</sup>H NMR (400 MHz, CDCl<sub>3</sub>)  $\delta$  8.21 (s, 1H), 7.58 (d,  $J = 8.0$  Hz, 1H), 7.29 (d,  $J = 8.0$  Hz, 1H), 7.20 (t,  $J = 7.5$  Hz, 1H), 7.18-7.11 (m, 3H), 7.04 (d,  $J = 8.0$  Hz, 2H), 5.99 (d,  $J = 7.6$  Hz, 1H), 4.91 (dd,  $J = 13.2, 6.0$  Hz, 1H), 3.69 (s, 3H), 3.45-3.33 (m, 2H), 2.28 (s, 3H), 1.80 (s, 3H). <sup>13</sup>C NMR (101 MHz, CDCl<sub>3</sub>)  $\delta$  172.3, 169.8, 137.6, 137.1, 130.4, 130.3, 127.9, 127.2, 123.2, 120.6, 120.1, 118.9, 116.9, 110.9, 52.9, 52.5, 28.2, 23.0, 21.0. IR  $\nu_{\max}$  (KBr, film, cm<sup>-1</sup>): 3271, 3056, 2950, 2925, 2855, 1743, 1657, 1517, 1489, 1436, 1374, 1340, 1216, 1014, 802, 744. HRMS (ESI): calcd for C<sub>20</sub>H<sub>21</sub>O<sub>3</sub>N<sub>2</sub>Se<sup>+</sup> [M-H]<sup>+</sup>: 429.0723, found: 429.0733.

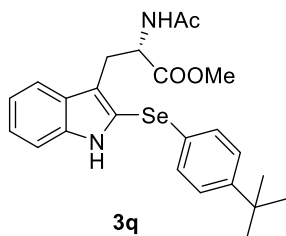

**methyl (S)-2-acetamido-3-(2-((4-*tert*-butyl)phenyl)selanyl)-1*H*-indol-3-yl)propanoate 3q.** Pale yellow solid, 36.9 mg (from 0.1 mmol), 78% yield, m.p. 80-82 °C.  $[\alpha]_D^{28} = 29.0$  (c 0.255, CHCl<sub>3</sub>). <sup>1</sup>H NMR (400 MHz, CDCl<sub>3</sub>)  $\delta$  8.25 (s, 1H), 7.59 (d,  $J = 8.0$  Hz, 1H), 7.30 (d,  $J = 8.0$  Hz, 1H), 7.24-7.23 (m, 2H), 7.21-7.12 (m, 4H), 5.98 (d,  $J = 7.6$  Hz, 1H), 4.91 (dd,  $J = 13.2, 6.0$  Hz, 1H), 3.70 (s, 3H), 3.47-3.34 (m, 2H), 1.76 (s, 3H), 1.26 (s, 9H). <sup>13</sup>C NMR (101 MHz, CDCl<sub>3</sub>)  $\delta$  172.3, 169.8, 150.4, 137.7, 129.7, 127.8, 127.5, 126.7, 123.3, 120.3, 120.1, 118.9, 117.2, 110.9, 53.0, 52.5, 34.5, 31.2, 28.2, 23.0. IR  $\nu_{\max}$  (KBr, film, cm<sup>-1</sup>): 3271, 3054, 2960, 2865, 1738, 1659, 1517, 1498, 1436, 1374, 1341, 1217, 1113, 1010, 820, 743, 542. HRMS (ESI): calcd for C<sub>24</sub>H<sub>27</sub>O<sub>3</sub>N<sub>2</sub>Se<sup>+</sup> [M-H]<sup>+</sup>: 471.1192, found: 471.1202.

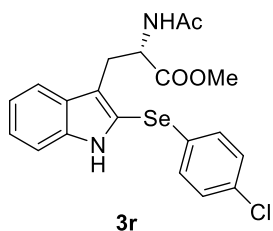

**methyl (S)-2-acetamido-3-(2-(4-chlorophenyl)selanyl)-1*H*-indol-3-yl)propanoate 3r.** Pale yellow solid, 32.9 mg (from 0.1 mmol), 73% yield, m.p. 72-74 °C.  $[\alpha]_D^{28} = 41.2$  (c 0.255, CHCl<sub>3</sub>). <sup>1</sup>H NMR (400 MHz, CDCl<sub>3</sub>)  $\delta$  8.29 (s, 1H), 7.60 (d,  $J = 7.6$  Hz, 1H), 7.31 (d,  $J = 8.0$  Hz, 1H), 7.23 (t,  $J = 7.6$  Hz, 1H), 7.19-7.10 (m, 5H), 5.99 (d,  $J = 8.0$  Hz, 1H), 4.92 (dd,  $J = 13.4, 5.8$  Hz, 1H),



3.67 (s, 3H), 3.45-3.31 (m, 2H), 1.84 (s, 3H).  $^{13}\text{C}$  NMR (101 MHz,  $\text{CDCl}_3$ )  $\delta$  172.3, 169.7, 137.7, 133.1, 130.9, 129.7, 129.6, 127.8, 123.6, 120.3, 119.4, 119.1, 117.9, 111.1, 52.9, 52.5, 28.3, 23.1. IR  $\nu_{\text{max}}$  (KBr, film,  $\text{cm}^{-1}$ ): 3271, 3056, 2951, 2926, 2854, 2738, 1651, 1517, 1473, 1436, 1374, 1340, 1218, 1088, 1009, 812, 744. HRMS (ESI): calcd for  $\text{C}_{20}\text{H}_{18}\text{O}_3\text{N}_2\text{ClSe}^+$   $[\text{M}-\text{H}]^+$ : 449.0177, found: 449.0186.

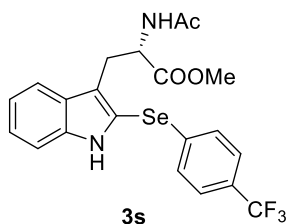

**methyl (S)-2-acetamido-3-(2-((4-(trifluoromethyl)phenyl)selenanyl)-1H-indol-3-yl)propanoate 3s.** Yellow solid, 32.1 mg (from 0.1 mmol), 66% yield, m.p. 77-79 °C.  $[\alpha]_{\text{D}}^{28} = 45.6$  (c 1.01,  $\text{CHCl}_3$ ).  $^1\text{H}$  NMR (400 MHz,  $\text{CDCl}_3$ )  $\delta$  8.47 (s, 1H), 7.62 (d,  $J = 7.6$  Hz, 1H), 7.42 (d,  $J = 8.4$  Hz, 2H), 7.33 (d,  $J = 8.4$  Hz, 1H), 7.27-7.25 (m, 1H), 7.22 (d,  $J = 8.4$  Hz, 2H), 7.17 (t,  $J = 7.6$  Hz, 1H), 6.00 (d,  $J = 7.6$  Hz, 1H), 4.92 (dd,  $J = 13.6, 6.0$  Hz, 1H), 3.66 (s, 3H), 3.45-3.31 (m, 2H), 1.81 (s, 3H).  $^{13}\text{C}$  NMR (101 MHz,  $\text{CDCl}_3$ )  $\delta$  172.2, 169.7, 137.9, 137.2, 128.8 (q,  $J = 33.3$  Hz), 127.7, 126.2 (q,  $J = 3.7$  Hz), 123.9 (q,  $J = 273.2$  Hz), 123.8, 122.5, 120.3, 119.2, 118.7, 118.2, 111.2, 52.9, 52.5, 28.4, 23.0.  $^{19}\text{F}$  NMR (377 MHz,  $\text{CDCl}_3$ )  $\delta$  -62.7 (s). IR  $\nu_{\text{max}}$  (KBr, film,  $\text{cm}^{-1}$ ): 3258, 2921, 1737, 1659, 1601, 1522, 1438, 1325, 1165, 1123, 1074, 1012, 827, 745. HRMS (ESI): calcd for  $\text{C}_{21}\text{H}_{18}\text{O}_3\text{N}_2\text{F}_3\text{Se}^+$   $[\text{M}-\text{H}]^+$ : 483.0440, found: 483.0450.

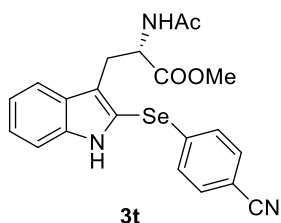

**methyl (S)-2-acetamido-3-(2-((4-cyanophenyl)selenanyl)-1H-indol-3-yl)propanoate 3t.** Pale yellow solid, 39.1 mg (from 0.1 mmol), 89% yield, m.p. 87-88 °C.  $[\alpha]_{\text{D}}^{29} = 48.4$  (c 0.25,  $\text{CHCl}_3$ ).  $^1\text{H}$  NMR (400 MHz,  $\text{CDCl}_3$ )  $\delta$  8.45 (s, 1H), 7.63 (d,  $J = 8.0$  Hz, 1H), 7.42 (d,  $J = 8.4$  Hz, 2H), 7.35 (d,  $J = 8.4$  Hz, 1H), 7.28-7.27 (m, 1H), 7.18 (t,  $J = 8.2$  Hz, 3H), 6.00 (d,  $J = 8.0$  Hz, 1H), 4.91 (dd,  $J = 13.8, 5.8$  Hz, 1H), 3.65 (s, 3H), 3.43-3.29 (m, 2H), 1.84 (s, 3H).  $^{13}\text{C}$  NMR (101 MHz,  $\text{CDCl}_3$ )  $\delta$  172.1, 169.6, 139.8, 137.9, 132.7, 128.7, 127.7, 124.1, 120.5, 119.3, 119.2, 118.5, 117.4, 111.3, 109.9, 52.9, 52.5, 28.4, 23.1. IR  $\nu_{\text{max}}$  (KBr, film,  $\text{cm}^{-1}$ ): 3356, 3059, 2951, 2922, 2851, 2226, 1740, 1657, 1586, 1523, 1483, 1437, 1374, 1341, 1218, 1014, 821, 746, 544. HRMS (ESI): calcd for  $\text{C}_{21}\text{H}_{18}\text{O}_3\text{N}_3\text{Se}^+$   $[\text{M}-\text{H}]^+$ : 440.0519, found: 440.0526.

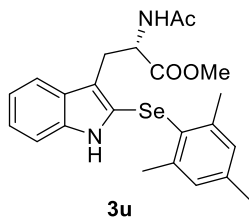

**methyl (S)-2-acetamido-3-(2-(mesitylselenanyl)-1H-indol-3-yl)propanoate 3u.** Pale yellow solid, 7.4 mg (from 0.1 mmol), 16% yield, m.p. 74-76 °C.  $[\alpha]_{\text{D}}^{29} = 38.2$  (c 0.11,  $\text{CHCl}_3$ ).  $^1\text{H}$  NMR (400 MHz,  $\text{CDCl}_3$ )  $\delta$  7.54 (s, 1H), 7.44 (d,  $J = 8.0$  Hz, 1H), 7.15-7.13 (m, 1H), 7.07-7.06 (m, 2H), 6.97 (s, 2H), 6.03 (d,  $J = 7.2$  Hz, 1H), 4.97 (dd,  $J = 12.8, 5.2$  Hz, 1H), 3.73 (s, 3H), 3.37-3.36 (m, 2H), 2.42 (s, 6H), 2.30 (s, 3H), 1.99 (s, 3H).  $^{13}\text{C}$  NMR (101 MHz,  $\text{CDCl}_3$ )  $\delta$  172.3, 169.6, 142.9, 139.4, 137.7, 129.3, 128.5,

125.3, 123.2, 121.8, 119.8, 117.8, 111.9, 110.3, 52.7, 52.5, 28.4, 24.2, 23.3, 20.9. IR  $\nu_{\max}$  (KBr, film,  $\text{cm}^{-1}$ ): 3271, 2951, 2923, 2852, 1737, 1661, 1517, 1436, 1374, 1340, 1261, 1217, 1021, 851, 801, 742. HRMS (ESI): calcd for  $\text{C}_{23}\text{H}_{25}\text{O}_3\text{N}_2\text{Se}^+$   $[\text{M}-\text{H}]^+$ : 457.1036, found: 457.1045.

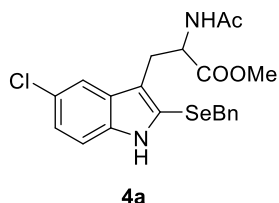

**methyl 2-acetamido-3-(2-(benzylselanyl)-5-chloro-1H-indol-3-yl)propanoate 4a.** Yellow solid, 28.3 mg (from 0.1 mmol), 61% yield, m.p. 61-63 °C.  $^1\text{H}$  NMR (400 MHz,  $\text{CDCl}_3$ )  $\delta$  8.01 (s, 1H), 7.44 (s, 1H), 7.19-7.16 (m, 3H), 7.09 (s, 2H), 7.00-6.98 (m, 2H), 6.00 (d,  $J = 7.6$  Hz, 1H), 4.84 (dd,  $J = 13.2, 5.6$  Hz, 1H), 3.92 (s, 2H), 3.69 (s, 3H), 3.14-3.01 (m, 2H), 1.94 (s, 3H).  $^{13}\text{C}$  NMR (101 MHz,  $\text{CDCl}_3$ )  $\delta$  172.2, 169.6, 138.4, 135.6, 128.7, 128.6, 127.2, 125.6, 123.3, 122.5, 118.2, 116.9, 111.7, 52.7, 52.5, 33.5, 27.9, 23.2. IR  $\nu_{\max}$  (KBr, film,  $\text{cm}^{-1}$ ): 3262, 3061, 3028, 2926, 1851, 1737, 1657, 1520, 1437, 1374, 1263, 1215, 800, 737, 697. HRMS (ESI): calcd for  $\text{C}_{21}\text{H}_{21}\text{O}_3\text{N}_2\text{ClNaSe}^+$   $[\text{M}+\text{Na}]^+$ : 487.0298, found: 487.0297.

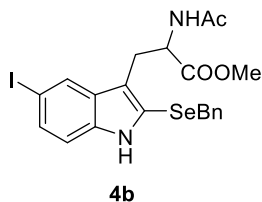

**methyl 2-acetamido-3-(2-(benzylselanyl)-5-iodo-1H-indol-3-yl)propanoate 4b.** Yellow solid, 43.1 mg (from 0.1 mmol), 78% yield, m.p. 70-72 °C.  $^1\text{H}$  NMR (300 MHz,  $\text{CDCl}_3$ )  $\delta$  7.89 (s, 1H), 7.80 (s, 1H), 7.39 (dd,  $J = 8.5, 1.3$  Hz, 1H), 7.20-7.15 (m, 3H), 7.01-6.94 (m, 3H), 5.97 (d,  $J = 8.1$  Hz, 1H), 4.84 (dd,  $J = 13.5, 5.4$  Hz, 1H), 3.92 (s, 2H), 3.71 (s, 3H), 3.16-3.01 (m, 2H), 1.96 (s, 3H).  $^{13}\text{C}$  NMR (101 MHz,  $\text{CDCl}_3$ )  $\delta$  172.1, 169.6, 138.5, 136.3, 131.2, 130.2, 128.7, 128.6, 127.8, 127.3, 122.1, 116.5, 112.6, 83.3, 52.7, 52.5, 33.5, 27.8, 23.3. IR  $\nu_{\max}$  (KBr, film,  $\text{cm}^{-1}$ ): 3262, 3059, 3028, 2923, 2851, 1734, 1657, 1517, 1436, 1374, 1213, 797, 759, 696. HRMS (ESI): calcd for  $\text{C}_{21}\text{H}_{21}\text{O}_3\text{N}_2\text{INaSe}^+$   $[\text{M}+\text{Na}]^+$ : 578.9654, found: 578.9659.

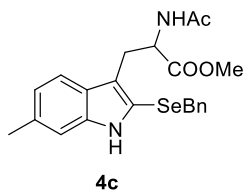

**methyl 2-acetamido-3-(2-(benzylselanyl)-6-methyl-1H-indol-3-yl)propanoate 4c.** Yellow solid, 32.7 mg (from 0.1 mmol), 74% yield, m.p. 52-54 °C.  $^1\text{H}$  NMR (300 MHz,  $\text{CDCl}_3$ )  $\delta$  7.71 (s, 1H), 7.38 (d,  $J = 8.1$  Hz, 1H), 7.21-7.19 (m, 3H), 7.03-7.01 (m, 3H), 6.93 (d,  $J = 8.1$  Hz, 1H), 5.95 (d,  $J = 7.5$  Hz, 1H), 4.82 (dd,  $J = 13.5, 6.0$  Hz, 1H), 3.90 (s, 2H), 3.67 (s, 3H), 3.18-3.03 (m, 2H), 2.44 (s, 3H), 1.91 (s, 3H).  $^{13}\text{C}$  NMR (101 MHz,  $\text{CDCl}_3$ )  $\delta$  172.4, 169.6, 138.8, 137.8, 133.0, 128.7, 128.5, 127.1, 125.7, 121.7, 119.9, 118.5, 117.2, 110.6, 52.8, 52.4, 33.6, 27.9, 23.2, 21.7. IR  $\nu_{\max}$  (KBr, film,  $\text{cm}^{-1}$ ): 3271, 3061, 3028, 2917, 2849, 1739, 1657, 1520, 1437, 1373, 1340, 2161, 1216, 1029, 802, 760, 736, 697. HRMS (ESI): calcd for  $\text{C}_{22}\text{H}_{24}\text{O}_3\text{N}_2\text{NaSe}^+$   $[\text{M}+\text{Na}]^+$ : 467.0844, found: 467.0847.

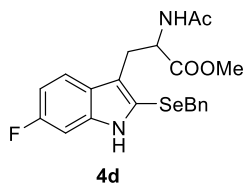

**methyl 2-acetamido-3-(2-(benzylselanyl)-6-fluoro-1H-indol-3-yl)propanoate 4d.** Yellow solid, 40.8 mg (from 0.1 mmol), 91% yield, m.p. 52-54 °C.  $^1\text{H NMR}$  (400 MHz,  $\text{CDCl}_3$ )  $\delta$  8.04 (s, 1H), 7.43-7.40 (m, 1H), 7.22-7.15 (m, 3H), 7.00 (d,  $J = 6.0$  Hz, 2H), 6.88-6.84 (m, 2H), 6.02 (d,  $J = 7.6$  Hz, 1H), 4.83 (dd,  $J = 13.2, 6.0$  Hz, 1H), 3.90 (s, 2H), 3.66 (s, 3H), 3.15-3.03 (m, 2H), 1.92 (s, 3H).  $^{13}\text{C NMR}$  (101 MHz,  $\text{CDCl}_3$ )  $\delta$  172.3, 169.7, 160.4 (d,  $J = 16.6$  Hz), 138.5, 137.2 (d,  $J = 12.4$  Hz), 128.7, 128.5, 127.2, 124.3, 120.8 (d,  $J = 4.0$  Hz), 119.6 (d,  $J = 11.1$  Hz), 117.5, 108.7 (d,  $J = 24.2$  Hz), 97.0 (d,  $J = 26.3$  Hz), 52.8, 52.4, 33.5, 28.0, 23.2.  $^{19}\text{F NMR}$  (377 MHz,  $\text{CDCl}_3$ )  $\delta$  -119.5 (s). IR  $\nu_{\text{max}}$  (KBr, film,  $\text{cm}^{-1}$ ): 3268, 3061, 3028, 2918, 2849, 1739, 1657, 1525, 1439, 1346, 1291, 1216, 1120, 958, 836, 803, 760, 697. HRMS (ESI): calcd for  $\text{C}_{21}\text{H}_{21}\text{O}_3\text{N}_2\text{FNaSe}^+$   $[\text{M}+\text{Na}]^+$ : 471.0594, found: 471.0597.

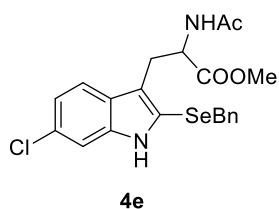

**methyl 2-acetamido-3-(2-(benzylselanyl)-6-chloro-1H-indol-3-yl)propanoate 4e.** Yellow solid, 36.3 mg (from 0.1 mmol), 78% yield, m.p. 62-64 °C.  $^1\text{H NMR}$  (400 MHz,  $\text{CDCl}_3$ )  $\delta$  8.02 (s, 1H), 7.40 (d,  $J = 8.4$  Hz, 1H), 7.22-7.16 (m, 4H), 7.05 (d,  $J = 8.4$  Hz, 1H), 6.99 (d,  $J = 6.4$  Hz, 2H), 6.00 (d,  $J = 7.6$  Hz, 1H), 4.83 (dd,  $J = 13.2, 6.0$  Hz, 1H), 3.91 (s, 2H), 3.66 (s, 3H), 3.15-3.02 (m, 2H), 1.92 (s, 3H).  $^{13}\text{C NMR}$  (101 MHz,  $\text{CDCl}_3$ )  $\delta$  172.3, 169.6, 138.5, 137.5, 129.0, 128.7, 128.5, 127.2, 126.3, 121.6, 120.6, 119.6, 117.4, 110.6, 52.8, 52.5, 33.5, 27.9, 23.2. IR  $\nu_{\text{max}}$  (KBr, film,  $\text{cm}^{-1}$ ): 3261, 3062, 3029, 2951, 2849, 1737, 1657, 1520, 1437, 1374, 1336, 1217, 1063, 917, 803, 759, 737, 697. HRMS (ESI): calcd for  $\text{C}_{21}\text{H}_{21}\text{O}_3\text{N}_2\text{ClNaSe}^+$   $[\text{M}+\text{Na}]^+$ : 487.0298, found: 487.0297.

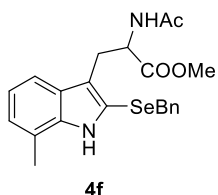

**methyl 2-acetamido-3-(2-(benzylselanyl)-7-methyl-1H-indol-3-yl)propanoate 4f.** Yellow solid, 38.0 mg (from 0.1 mmol), 86% yield, m.p. 60-62 °C.  $^1\text{H NMR}$  (300 MHz,  $\text{CDCl}_3$ )  $\delta$  7.59 (s, 1H), 7.35 (d,  $J = 7.8$  Hz, 1H), 7.23-7.19 (m, 3H), 7.09-6.94 (m, 4H), 5.97 (d,  $J = 7.8$  Hz, 1H), 4.86 (dd,  $J = 13.8, 5.7$  Hz, 1H), 3.93 (s, 2H), 3.68 (s, 3H), 3.26-3.10 (m, 2H), 2.31 (s, 3H), 1.91 (s, 3H).  $^{13}\text{C NMR}$  (126 MHz,  $\text{CDCl}_3$ )  $\delta$  172.3, 169.6, 139.0, 136.9, 128.9, 128.6, 127.3, 127.2, 123.4, 120.4, 120.1, 119.9, 117.5, 116.5, 52.9, 52.4, 33.5, 28.1, 23.3, 16.3. IR  $\nu_{\text{max}}$  (KBr, film,  $\text{cm}^{-1}$ ): 3271, 3026, 3027, 2920, 2849, 1737, 1657, 1517, 1453, 1374, 1218, 1029, 759, 748, 670. HRMS (ESI): calcd for  $\text{C}_{22}\text{H}_{24}\text{O}_3\text{N}_2\text{NaSe}^+$   $[\text{M}+\text{Na}]^+$ : 467.0844, found: 467.0847.

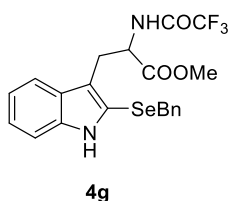

**methyl 3-(2-(benzylselanyl)-1H-indol-3-yl)-2-(2,2,2-trifluoroacetamido)propanoate 4g.** Yellow solid, 45.3 mg (from 0.1 mmol), 94% yield, m.p. 129-131 °C. <sup>1</sup>H NMR (400 MHz, CDCl<sub>3</sub>) δ 7.84 (s, 1H), 7.48 (d, *J* = 8.0 Hz, 1H), 7.25-7.18 (m, 5H), 7.12 (t, *J* = 7.4 Hz, 1H), 7.02-7.00 (m, 2H), 6.86 (d, *J* = 7.6 Hz, 1H), 4.80 (dd, *J* = 13.4, 6.2 Hz, 1H), 3.92 (s, 2H), 3.69 (s, 3H), 3.22-3.10 (m, 2H). <sup>13</sup>C NMR (101 MHz, CDCl<sub>3</sub>) δ 170.6, 156.7 (q, *J* = 37.8 Hz), 138.6, 137.3, 128.7, 128.5, 127.4, 127.2, 123.3, 120.9, 120.1, 118.4, 116.3, 115.5 (q, *J* = 37.8 Hz), 110.8, 53.2, 52.8, 33.5, 27.5. <sup>19</sup>F NMR (377 MHz, CDCl<sub>3</sub>) δ -75.8 (s). IR ν<sub>max</sub> (KBr, film, cm<sup>-1</sup>): 3366, 3059, 2925, 2854, 1714, 1545, 1441, 1340, 1212, 1173, 745, 697. HRMS (ESI): calcd for C<sub>21</sub>H<sub>18</sub>O<sub>3</sub>N<sub>2</sub>F<sub>3</sub>Se<sup>+</sup> [M-H]<sup>+</sup>: 483.0429, found: 483.0436.

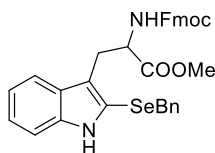

**4h**

**methyl 2-(((9H-fluoren-9-yl)methoxy)carbonyl)amino)-3-(2-(benzylselanyl)-1H-indol-3-yl)propanoate 4h.** White solid, 47 mg (from 0.1 mmol), 77% yield, m.p. 70-72 °C. <sup>1</sup>H NMR (400 MHz, CDCl<sub>3</sub>) δ 7.79 (s, 1H), 7.74 (d, *J* = 7.6 Hz, 2H), 7.57-7.50 (m, 3H), 7.38 (t, *J* = 7.2 Hz, 2H), 7.29-7.25 (m, 2H), 7.23-7.16 (m, 5H), 7.11 (t, *J* = 7.2 Hz, 1H), 7.04-7.03 (m, 2H), 5.38 (d, *J* = 8.0 Hz, 1H), 4.66 (dd, *J* = 14.0, 6.4 Hz, 1H), 4.33 (d, *J* = 6.8 Hz, 2H), 4.17 (t, *J* = 7.0 Hz, 1H), 3.91 (s, 2H), 3.69 (s, 3H), 3.26-3.12 (m, 2H). <sup>13</sup>C NMR (101 MHz, CDCl<sub>3</sub>) δ 172.4, 155.6, 143.9, 143.8, 141.2, 138.8, 137.3, 128.7, 128.5, 127.6, 127.1, 127.0, 125.1, 123.1, 121.0, 119.9, 119.9, 118.8, 117.2, 110.7, 67.0, 54.6, 52.4, 47.1, 33.5, 28.3. IR ν<sub>max</sub> (KBr, film, cm<sup>-1</sup>): 3353, 3060, 2921, 2850, 1706, 1517, 1448, 1340, 1214, 1057, 759, 740, 697. HRMS (ESI): calcd for C<sub>34</sub>H<sub>31</sub>O<sub>4</sub>N<sub>2</sub>Se<sup>+</sup> [M+H]<sup>+</sup>: 611.1444, found: 611.1436.

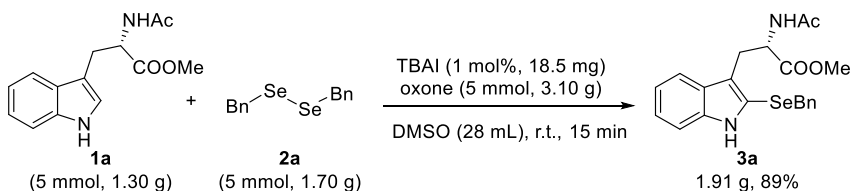

**Gram-Scale preparation:** To the mixture of *L*-acetyl tryptophanate **L-1a** (5 mmol, 1.3 g), dibenzyl diselenide (5 mmol, 1.7 g), TBAI (1 mol%, 18.5 mg) was added DMSO (27.5 mL). And then oxone (5 mmol, 3.1 g) was added in one portion. The mixture was stirred at room temperature for 15 min. Saturated sodium thiosulfate (30 mL) was added to quench the reaction. The reaction was diluted with ethyl acetate (50 mL) and washed by H<sub>2</sub>O (200 mL). Aqueous phase was extracted with ethyl acetate (50 mL × 4). The organic layer was combined, ethyl acetate was removed by rotary evaporator and the crude product was purified by silica column chromatography (elute: petroleum ether / ethyl acetate 1/3) to afford the desired product **3a** in the yield of 89%.

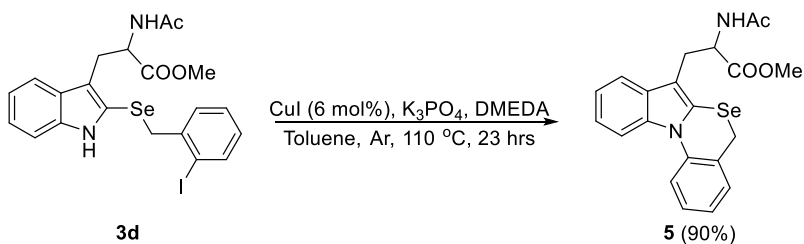

To the mixture of methyl 2-acetamido-3-(2-((2-iodobenzyl)selanyl)-1H-indol-3-yl)propanoate **3d** (0.050 mmol, 27.76 mg), CuI (0.003 mmol, 0.57 mg), K<sub>3</sub>PO<sub>4</sub> (0.075 mmol, 15.92 mg) was added toluene (0.5 mL) under argon atmosphere. *N,N'*-diethylethylenediamine (0.005 mmol, 0.52 μL) was then added. The mixture was heated to reflux for 23 hours. After

cooling to room temperature, the mixture was filtered through silica gel, the filter cake was washed with ethyl acetate (30 mL) and the filtrate was concentrated *in vacuo*. The crude was purified by silica column chromatography (elute: petroleum ether / ethyl acetate 1/3) to afford desired compound **5** as a white solid.

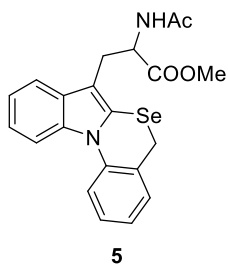

**methyl 2-acetamido-3-(5H-benzo[4,5][1,3]selenazino[3,2-a]indol-7-yl)propanoate 5.** White solid, 19.2 mg (from 0.05 mmol), 90% yield, m.p. 92-93 °C.  $^1\text{H}$  NMR (400 MHz,  $\text{CDCl}_3$ )  $\delta$  7.85-7.84 (m, 2H), 7.50-7.38 (m, 3H), 7.24-7.17 (m, 3H), 6.06 (d,  $J = 7.6$  Hz, 1H), 5.06-5.02 (m, 1H), 3.84-3.74 (m, 2H), 3.70 (s, 3H), 3.44-3.27 (m, 2H), 1.99 (s, 3H).  $^{13}\text{C}$  NMR (101 MHz,  $\text{CDCl}_3$ )  $\delta$  172.0, 169.6, 137.3, 136.3, 130.0, 129.8, 128.2, 127.9, 127.0, 124.7, 122.2, 121.3, 121.2, 117.9, 112.0, 111.5, 52.7, 52.6, 29.2, 23.9, 23.4. IR  $\nu_{\text{max}}$  (KBr, film,  $\text{cm}^{-1}$ ): 3357, 3194, 2922, 2850, 1943, 1659, 1632, 1490, 1448, 1369, 1212, 744. HRMS (ESI): calcd for  $\text{C}_{21}\text{H}_{20}\text{O}_3\text{N}_2\text{NaSe}^+$   $[\text{M}+\text{Na}]^+$ : 451.0531, found: 451.0537.

## 5. Control experiments

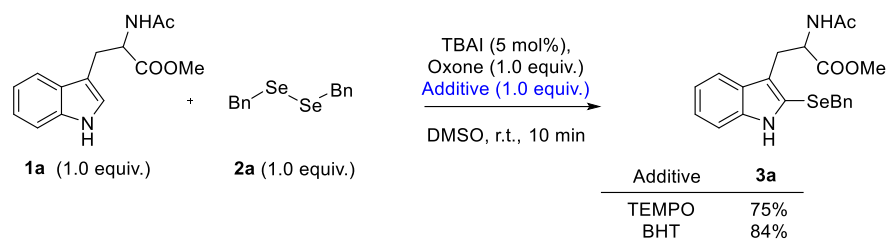

To the mixture of acetyl tryptophanate **1a** (0.1 mmol, 26.0 mg), diselenide (0.1 mmol, 34.0 mg), TBAI (5 mol%, 1.85 mg) and additive (TEMPO or BHT, 0.1 mmol) was added DMSO (0.55 mL). And then oxone (0.1 mmol, 61.5 mg) was added in one portion. The reaction was stirred at room temperature until the acetyl tryptophanate **1a** totally disappeared (monitored by TLC). Saturated sodium thiosulfate (1 mL) was added to quench the reaction. The reaction was diluted with ethyl acetate (5 mL) and washed by H<sub>2</sub>O (20 mL). The organic layer was combined, ethyl acetate was removed by rotary evaporator and the crude product was purified by silica column chromatography (elute: petroleum ether / ethyl acetate 1/3) to afford the desired product **3a**.

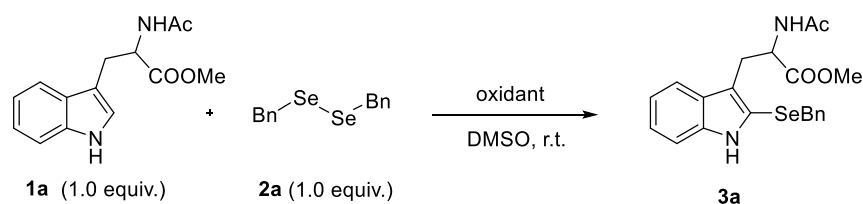

|                                                                                 |         |
|---------------------------------------------------------------------------------|---------|
| I <sub>2</sub> (1.0 equiv.), 24 h :                                             | 61% (1) |
| I <sub>2</sub> (1.0 equiv.) + <i>n</i> -Bu <sub>4</sub> OH (2.0 equiv.), 24 h : | 0% (2)  |
| TBAI <sub>3</sub> (1.0 equiv.), 24 h :                                          | 0% (3)  |
| NaIO <sub>3</sub> (1.0 equiv.), 24 h :                                          | 0% (4)  |
| NaIO <sub>4</sub> (1.0 equiv.), 24 h :                                          | 0% (5)  |
| I <sub>2</sub> (1.0 equiv.) + KHSO <sub>4</sub> (2.0 equiv.), 24 h :            | 76% (6) |
| TBAI <sub>3</sub> (1.0 equiv.) + KHSO <sub>4</sub> (2.0 equiv.), 24 h :         | 45% (7) |

**Entries (1), (3), (4) and (5):** To solution of acetyl tryptophanate **1a** (0.1 mmol, 26.0 mg) and diselenide (0.1 mmol, 34.0 mg) in DMSO (0.55 mL) was added iodine (0.1 mmol, 25.4 mg) or tetrabutylammonium triiodide (0.1 mmol, 62.3 mg) or sodium iodate (0.1 mmol, 19.8 mg) or sodium periodate (0.1 mmol, 21.4 mg) in one portion. The mixture was stirred at room temperature and monitored by TLC. Saturated sodium thiosulfate (1 mL) was added to quench the reaction. The reaction was diluted with ethyl acetate (5 mL) and washed by H<sub>2</sub>O (20 mL). Aqueous phase was extracted with ethyl acetate (5 mL × 2). The organic layer was combined, ethyl acetate was removed by rotary evaporator and the crude product was purified by silica column chromatography (elute: petroleum ether / ethyl acetate 1/3). (26.2 mg, yield 61% for entry 1, no reaction for entry 3, 4, 5)

**Entry (2):** Iodine (0.1 mmol, 25.4 mg) and 25% aqueous tetrabutylammoniumhydroxide (0.2 mmol, 205 μL) were mixed in DMSO (0.55 mL), and the mixture was stirred at room temperature for 10 minutes. Acetyl tryptophanate **1a** (0.1 mmol, 26.0 mg), diselenide (0.1 mmol, 34.0 mg) was added to the mixture in sequence. The mixture was stirred at room temperature and monitored by TLC. After stirring for 24 hours, saturated sodium thiosulfate (1 mL) was added to quench the reaction.

yield 85%)

*Entry (6):* To solution of acetyl tryptophanate **1a** (0.1 mmol, 26.0 mg), diselenide (0.1 mmol, 34.0 mg) and KHSO<sub>4</sub> (0.2 mmol, 27.2 mg) in DMSO (0.55 mL) was added iodine (0.1 mmol, 25.4 mg) in one portion. The mixture was stirred at room temperature and monitored by TLC. After stirring for 24 hours at room temperature, saturated sodium thiosulfate (1 mL) was added to quench the reaction. The reaction was diluted with ethyl acetate (5 mL) and washed by H<sub>2</sub>O (20 mL). Aqueous phase was extracted with ethyl acetate (5 mL × 2). The organic layer was combined, ethyl acetate was removed by rotary evaporator and the crude product was purified by silica column chromatography (elute: petroleum ether / ethyl acetate 1/3) to afford the desired product **3a** (36.5 mg, yield 85%).

*Entry (7):* To solution of acetyl tryptophanate **1a** (0.1 mmol, 26.0 mg), diselenide (0.1 mmol, 34.0 mg) and KHSO<sub>4</sub> (0.2 mmol, 27.2 mg) in DMSO (0.55 mL) was added tetrabutylammonium triiodide (0.1 mmol, 62.3 mg) in one portion. The mixture was stirred at room temperature and monitored by TLC. After stirring for 24 hours at room temperature, saturated sodium thiosulfate (1 mL) was added to quench the reaction. The reaction was diluted with ethyl acetate (5 mL) and washed by H<sub>2</sub>O (20 mL). Aqueous phase was extracted with ethyl acetate (5 mL × 2). The organic layer was combined, ethyl acetate was removed by rotary evaporator and the crude product was purified by silica column chromatography (elute: petroleum ether / ethyl acetate 1/3) to afford the desired product **3a** (19.5 mg, yield 45%).

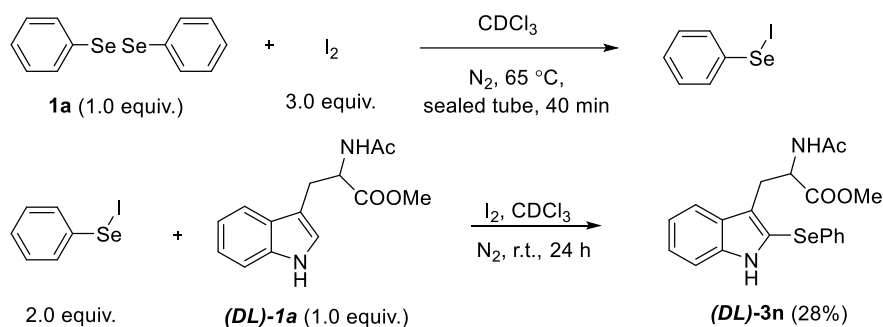

The PhSeI<sup>[5]</sup> synthesised herein are sensitive to moisture, therefore the reaction techniques were employed throughout, with all additions being performed in an N<sub>2</sub> filled glove box. Under the N<sub>2</sub> atmosphere, I<sub>2</sub> (0.75 mmol, 190.5 mg) was dissolved in CDCl<sub>3</sub> (5 mL), and then diphenyldiselenide was added. The mixture was sealed tube and stirred at 65 °C for 40 minutes. The dark purple solution containing PhSeI (0.1 M in CDCl<sub>3</sub>) was obtained. NMR spectra of the resulting solution under N<sub>2</sub> atmosphere also proved the formation of PhSeI (<sup>1</sup>H NMR (300 MHz, CDCl<sub>3</sub>) δ 7.73-7.70 (m, 2H), 7.34-7.26 (m, 3H). <sup>13</sup>C NMR (101 MHz, CDCl<sub>3</sub>) δ 134.1, 129.4, 129.3.). Under the N<sub>2</sub> atmosphere, (DL)-1a (0.1 mmol, 26.0 mg) in the reaction tube was added PhSeI (0.1 M in CDCl<sub>3</sub>, 2 mL). The mixture was stirred at room temperature for 24 h. Saturated sodium thiosulfate (1 mL) was added to quench the reaction. The reaction was diluted with ethyl acetate (5 mL) and washed by H<sub>2</sub>O (20 mL). Aqueous phase was extracted with ethyl acetate (5 mL × 2). The organic layer was combined, ethyl acetate was removed by rotary evaporator and the crude product was purified by silica column chromatography (elute: petroleum ether / ethyl acetate 1/3) to afford the products (DL)-3n with the yield of 28%.

## 6. X-ray crystallographic data

X-ray crystallography of compound **3j** (CCDC 2058699)

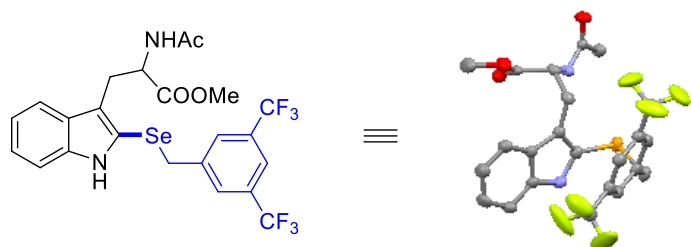

Table 1 Crystal data and structure refinement for A.

Identification code A

Empirical formula  $C_{23}H_{20}F_6N_2O_3Se$

Formula weight 565.37

Temperature/K 169.99(11)

Crystal system triclinic

Space group P-1

$a/\text{\AA}$  9.17100(10)

$b/\text{\AA}$  10.0901(3)

$c/\text{\AA}$  13.7727(3)

$\alpha/^\circ$  109.3780(10)

$\beta/^\circ$  91.5750(10)

$\gamma/^\circ$  100.5370(10)

Volume/ $\text{\AA}^3$  1176.65(5)

Z 2

$\rho_{\text{calc}}/\text{cm}^3$  1.596

$\mu/\text{mm}^{-1}$  2.860

F(000) 568.0

Crystal size/ $\text{mm}^3$  0.11  $\times$  0.08  $\times$  0.05

Radiation Cu K $\alpha$  ( $\lambda = 1.54178$ )

2 $\theta$  range for data collection/ $^\circ$  6.834 to 150.786

Index ranges  $-11 \leq h \leq 11$ ,  $-12 \leq k \leq 12$ ,  $-17 \leq l \leq 17$

Reflections collected 16758

Independent reflections 4667 [Rint = 0.0262, Rsigma = 0.0261]

Data/restraints/parameters 4667/0/318

Goodness-of-fit on F2 1.109

Final R indexes [ $I \geq 2\sigma(I)$ ] R1 = 0.0642, wR2 = 0.1983

Final R indexes [all data] R1 = 0.0648, wR2 = 0.1986

Largest diff. peak/hole /  $e \text{\AA}^{-3}$  1.70/-0.72

Table 2 Fractional Atomic Coordinates ( $\times 10^4$ ) and Equivalent Isotropic Displacement Parameters ( $\text{\AA}^2 \times 10^3$ ) for A. Ueq is defined as 1/3 of the trace of the orthogonalised UIJ tensor.



| Atom | x         | y         | z         | U(eq)    |  |
|------|-----------|-----------|-----------|----------|--|
| Se1  | 2904.5(6) | 6652.2(6) | 8098.8(4) | 34.1(2)  |  |
| F1   | 3743(6)   | 4133(6)   | 3724(5)   | 90.0(17) |  |
| F2   | 4251(6)   | 2670(8)   | 4380(4)   | 95.5(19) |  |
| F3   | 2597(5)   | 1979(7)   | 3101(4)   | 97(2)    |  |
| F4   | -1869(8)  | 1364(7)   | 6202(4)   | 120(3)   |  |
| F5   | -1736(6)  | 285(5)    | 4681(4)   | 93.1(19) |  |
| F6   | -2892(6)  | 1927(8)   | 5093(10)  | 172(5)   |  |
| O1   | 5509(4)   | 3098(4)   | 9575(3)   | 38.3(9)  |  |
| O2   | 5345(5)   | 1352(4)   | 8044(3)   | 40.8(9)  |  |
| O3   | 8318(4)   | 5515(4)   | 8214(3)   | 40.0(9)  |  |
| N1   | 921(5)    | 4583(4)   | 8675(3)   | 29.6(9)  |  |
| N2   | 5982(5)   | 5177(4)   | 8657(3)   | 30.4(9)  |  |
| C00V | 3112(7)   | 3002(8)   | 3980(5)   | 46.0(14) |  |
| C1   | 2204(6)   | 4838(5)   | 8216(4)   | 29.1(10) |  |
| C2   | 2775(5)   | 3600(5)   | 7851(4)   | 26.9(10) |  |
| C3   | 1741(5)   | 2517(5)   | 8097(4)   | 25.7(9)  |  |
| C4   | 1644(6)   | 1043(5)   | 7898(4)   | 31.8(11) |  |
| C5   | 467(6)    | 303(6)    | 8234(5)   | 39.7(13) |  |
| C6   | -635(6)   | 986(6)    | 8752(5)   | 41.4(13) |  |
| C7   | -598(6)   | 2422(6)   | 8930(4)   | 35.1(11) |  |
| C8   | 601(5)    | 3169(5)   | 8600(4)   | 27.8(10) |  |
| C9   | 4140(6)   | 3390(6)   | 7299(4)   | 32.3(11) |  |
| C10  | 5585(5)   | 3683(5)   | 8004(4)   | 28.8(10) |  |
| C11  | 5483(5)   | 2719(5)   | 8656(4)   | 30.5(11) |  |
| C12  | 5203(8)   | 317(7)    | 8564(6)   | 53.3(17) |  |
| C13  | 7300(5)   | 6001(5)   | 8681(4)   | 27.1(10) |  |
| C14  | 7474(6)   | 7565(6)   | 9280(5)   | 37.1(12) |  |
| C15  | 1355(6)   | 6480(6)   | 6996(4)   | 35.7(12) |  |
| C16  | 1124(6)   | 5038(6)   | 6168(4)   | 30.5(10) |  |
| C17  | 2160(6)   | 4703(6)   | 5455(4)   | 33.9(11) |  |
| C18  | 1953(6)   | 3353(6)   | 4712(4)   | 33.2(11) |  |
| C19  | 694(6)    | 2303(6)   | 4658(4)   | 35.1(11) |  |
| C20  | -332(6)   | 2652(6)   | 5361(4)   | 33.6(11) |  |
| C21  | -125(6)   | 4013(6)   | 6121(4)   | 32.0(11) |  |
| C22  | -1713(7)  | 1575(7)   | 5332(5)   | 43.5(13) |  |

Table 3 Anisotropic Displacement Parameters ( $\text{\AA}^2 \times 10^3$ ) for A. The Anisotropic displacement factor exponent takes the form:  $-2\pi^2[h_2a^*2U_{11}+2hka^*b^*U_{12}+...]$ .

| Atom | U11     | U22     | U33     | U23     | U13     | U12     |
|------|---------|---------|---------|---------|---------|---------|
| Se1  | 37.1(3) | 24.4(3) | 38.9(3) | 12.6(2) | -5.2(2) | -0.7(2) |
| F1   | 89(4)   | 92(4)   | 97(4)   | 41(3)   | 60(3)   | 14(3)   |
| F2   | 62(3)   | 165(6)  | 83(3)   | 49(4)   | 22(3)   | 69(4)   |
| F3   | 58(3)   | 125(5)  | 52(3)   | -32(3)  | 23(2)   | -6(3)   |

|      |          |          |         |          |          |          |
|------|----------|----------|---------|----------|----------|----------|
| F4   | 140(6)   | 120(5)   | 60(3)   | 29(3)    | 18(3)    | -69(4)   |
| F5   | 88(4)    | 61(3)    | 88(4)   | -10(3)   | 27(3)    | -25(3)   |
| F6   | 31(3)    | 120(5)   | 408(15) | 165(8)   | -22(5)   | -12(3)   |
| O1   | 38(2)    | 40(2)    | 38(2)   | 12.7(17) | 5.4(16)  | 12.2(17) |
| O2   | 43(2)    | 24.2(18) | 53(2)   | 8.8(17)  | 13.0(18) | 8.8(16)  |
| O3   | 27.1(19) | 41(2)    | 49(2)   | 10.3(18) | 10.7(16) | 8.4(16)  |
| N1   | 28(2)    | 27(2)    | 33(2)   | 6.9(17)  | 1.8(17)  | 9.6(17)  |
| N2   | 25(2)    | 24(2)    | 38(2)   | 4.2(17)  | 10.2(17) | 4.6(16)  |
| C00V | 36(3)    | 62(4)    | 36(3)   | 12(3)    | 5(2)     | 10(3)    |
| C1   | 31(3)    | 24(2)    | 30(2)   | 7.3(19)  | -2.1(19) | 4.3(19)  |
| C2   | 27(2)    | 25(2)    | 25(2)   | 5.1(18)  | -2.0(18) | 1.9(19)  |
| C3   | 24(2)    | 24(2)    | 25(2)   | 5.6(18)  | -2.7(18) | 1.7(18)  |
| C4   | 26(2)    | 24(2)    | 38(3)   | 3(2)     | 1(2)     | 2.3(19)  |
| C5   | 35(3)    | 22(2)    | 57(4)   | 10(2)    | 3(3)     | 0(2)     |
| C6   | 28(3)    | 34(3)    | 60(4)   | 18(3)    | 8(2)     | -5(2)    |
| C7   | 24(2)    | 36(3)    | 45(3)   | 14(2)    | 5(2)     | 5(2)     |
| C8   | 23(2)    | 27(2)    | 31(2)   | 8(2)     | -2.5(18) | 3.9(19)  |
| C9   | 36(3)    | 30(3)    | 27(2)   | 7(2)     | 8(2)     | 3(2)     |
| C10  | 25(2)    | 23(2)    | 35(3)   | 5(2)     | 10.4(19) | 3.0(18)  |
| C11  | 19(2)    | 28(2)    | 45(3)   | 10(2)    | 8(2)     | 7.5(18)  |
| C12  | 45(4)    | 32(3)    | 90(5)   | 28(3)    | 16(3)    | 12(3)    |
| C13  | 24(2)    | 28(2)    | 31(2)   | 13(2)    | 0.8(19)  | 5.9(19)  |
| C14  | 29(3)    | 27(3)    | 54(3)   | 14(2)    | 3(2)     | 2(2)     |
| C15  | 40(3)    | 30(3)    | 38(3)   | 13(2)    | -3(2)    | 9(2)     |
| C16  | 32(3)    | 35(3)    | 29(2)   | 14(2)    | -2(2)    | 10(2)    |
| C17  | 29(3)    | 42(3)    | 33(3)   | 18(2)    | -1(2)    | 4(2)     |
| C18  | 30(3)    | 44(3)    | 29(2)   | 13(2)    | 2(2)     | 11(2)    |
| C19  | 37(3)    | 37(3)    | 31(3)   | 10(2)    | 1(2)     | 9(2)     |
| C20  | 36(3)    | 36(3)    | 30(3)   | 14(2)    | 0(2)     | 7(2)     |
| C21  | 32(3)    | 36(3)    | 31(3)   | 14(2)    | 3(2)     | 10(2)    |
| C22  | 43(3)    | 41(3)    | 43(3)   | 13(3)    | 5(3)     | 2(3)     |

Table 4 Bond Lengths for A.

| Atom | Atom | Length/Å | Atom | Atom | Length/Å |
|------|------|----------|------|------|----------|
| Se1  | C1   | 1.887(5) | C2   | C9   | 1.494(7) |
| Se1  | C15  | 1.993(5) | C3   | C4   | 1.406(7) |
| F1   | C00V | 1.341(9) | C3   | C8   | 1.412(7) |
| F2   | C00V | 1.314(8) | C4   | C5   | 1.378(8) |
| F3   | C00V | 1.310(8) | C5   | C6   | 1.405(8) |
| F4   | C22  | 1.293(8) | C6   | C7   | 1.381(8) |
| F5   | C22  | 1.309(8) | C7   | C8   | 1.391(7) |
| F6   | C22  | 1.265(9) | C9   | C10  | 1.543(7) |
| O1   | C11  | 1.192(7) | C10  | C11  | 1.521(7) |
| O2   | C11  | 1.337(6) | C13  | C14  | 1.495(7) |

|      |     |          |     |     |          |
|------|-----|----------|-----|-----|----------|
| O2   | C12 | 1.440(8) | C15 | C16 | 1.496(7) |
| O3   | C13 | 1.231(6) | C16 | C17 | 1.389(8) |
| N1   | C1  | 1.374(7) | C16 | C21 | 1.379(8) |
| N1   | C8  | 1.371(7) | C17 | C18 | 1.382(8) |
| N2   | C10 | 1.447(6) | C18 | C19 | 1.399(8) |
| N2   | C13 | 1.329(7) | C19 | C20 | 1.376(8) |
| C00V | C18 | 1.494(8) | C20 | C21 | 1.399(8) |
| C1   | C2  | 1.388(7) | C20 | C22 | 1.500(8) |
| C2   | C3  | 1.446(7) |     |     |          |

Table 5 Bond Angles for A.

| Atom | Atom | Atom | Angle/°  | Atom | Atom | Atom | Angle/°  |
|------|------|------|----------|------|------|------|----------|
| C1   | Se1  | C15  | 96.8(2)  | N2   | C10  | C11  | 110.4(4) |
| C11  | O2   | C12  | 115.6(5) | C11  | C10  | C9   | 112.4(4) |
| C8   | N1   | C1   | 109.1(4) | O1   | C11  | O2   | 124.0(5) |
| C13  | N2   | C10  | 122.7(4) | O1   | C11  | C10  | 126.1(5) |
| F1   | C00V | C18  | 112.0(6) | O2   | C11  | C10  | 109.8(5) |
| F2   | C00V | F1   | 103.1(6) | O3   | C13  | N2   | 122.1(5) |
| F2   | C00V | C18  | 113.1(5) | O3   | C13  | C14  | 121.3(5) |
| F3   | C00V | F1   | 105.4(6) | N2   | C13  | C14  | 116.5(4) |
| F3   | C00V | F2   | 108.6(6) | C16  | C15  | Se1  | 110.6(3) |
| F3   | C00V | C18  | 113.8(5) | C17  | C16  | C15  | 121.1(5) |
| N1   | C1   | Se1  | 120.6(4) | C21  | C16  | C15  | 119.5(5) |
| N1   | C1   | C2   | 110.4(4) | C21  | C16  | C17  | 119.4(5) |
| C2   | C1   | Se1  | 129.0(4) | C18  | C17  | C16  | 120.5(5) |
| C1   | C2   | C3   | 105.2(4) | C17  | C18  | C00V | 119.4(5) |
| C1   | C2   | C9   | 128.3(5) | C17  | C18  | C19  | 120.7(5) |
| C3   | C2   | C9   | 126.5(4) | C19  | C18  | C00V | 119.8(5) |
| C4   | C3   | C2   | 133.6(5) | C20  | C19  | C18  | 118.3(5) |
| C4   | C3   | C8   | 118.7(5) | C19  | C20  | C21  | 121.3(5) |
| C8   | C3   | C2   | 107.6(4) | C19  | C20  | C22  | 120.6(5) |
| C5   | C4   | C3   | 118.6(5) | C21  | C20  | C22  | 118.1(5) |
| C4   | C5   | C6   | 121.4(5) | C16  | C21  | C20  | 119.8(5) |
| C7   | C6   | C5   | 121.4(5) | F4   | C22  | F5   | 102.9(6) |
| C6   | C7   | C8   | 117.0(5) | F4   | C22  | C20  | 113.0(5) |
| N1   | C8   | C3   | 107.7(4) | F5   | C22  | C20  | 114.0(5) |
| N1   | C8   | C7   | 129.5(5) | F6   | C22  | F4   | 107.1(8) |
| C7   | C8   | C3   | 122.8(5) | F6   | C22  | F5   | 106.2(7) |
| C2   | C9   | C10  | 115.1(4) | F6   | C22  | C20  | 112.9(6) |
| N2   | C10  | C9   | 111.0(4) |      |      |      |          |

Table 6 Hydrogen Bonds for A.

| D  | H  | A   | d(D-H)/Å | d(H-A)/Å | d(D-A)/Å | D-H-A/° |
|----|----|-----|----------|----------|----------|---------|
| N1 | H1 | O31 | 0.86     | 2.26     | 2.850(6) | 125.3   |

1-1+X,+Y,+Z

Table 7 Torsion Angles for A.

| A    | B    | C   | D   | Angle/°   | A   | B   | C   | D    | Angle/°   |
|------|------|-----|-----|-----------|-----|-----|-----|------|-----------|
| Se1  | C1   | C2  | C3  | -176.2(4) | C8  | N1  | C1  | Se1  | 175.9(3)  |
| Se1  | C1   | C2  | C9  | 2.5(8)    | C8  | N1  | C1  | C2   | -1.5(6)   |
| Se1  | C15  | C16 | C17 | -74.6(5)  | C8  | C3  | C4  | C5   | -2.2(8)   |
| Se1  | C15  | C16 | C21 | 104.1(5)  | C9  | C2  | C3  | C4   | -2.0(9)   |
| F1   | C00V | C18 | C17 | -35.5(8)  | C9  | C2  | C3  | C8   | -178.8(5) |
| F1   | C00V | C18 | C19 | 146.3(6)  | C9  | C10 | C11 | O1   | -114.6(6) |
| F2   | C00V | C18 | C17 | 80.5(8)   | C9  | C10 | C11 | O2   | 65.0(5)   |
| F2   | C00V | C18 | C19 | -97.7(7)  | C10 | N2  | C13 | O3   | -6.2(8)   |
| F3   | C00V | C18 | C17 | -154.9(6) | C10 | N2  | C13 | C14  | 171.9(5)  |
| F3   | C00V | C18 | C19 | 26.9(9)   | C12 | O2  | C11 | O1   | 0.9(7)    |
| N1   | C1   | C2  | C3  | 1.0(5)    | C12 | O2  | C11 | C10  | -178.7(4) |
| N1   | C1   | C2  | C9  | 179.6(5)  | C13 | N2  | C10 | C9   | -124.5(5) |
| N2   | C10  | C11 | O1  | 9.9(7)    | C13 | N2  | C10 | C11  | 110.1(5)  |
| N2   | C10  | C11 | O2  | -170.5(4) | C15 | Se1 | C1  | N1   | -72.6(4)  |
| C00V | C18  | C19 | C20 | 178.4(5)  | C15 | Se1 | C1  | C2   | 104.2(5)  |
| C1   | N1   | C8  | C3  | 1.4(5)    | C15 | C16 | C17 | C18  | 178.1(5)  |
| C1   | N1   | C8  | C7  | -178.3(5) | C15 | C16 | C21 | C20  | -178.6(5) |
| C1   | C2   | C3  | C4  | 176.7(5)  | C16 | C17 | C18 | C00V | -177.7(5) |
| C1   | C2   | C3  | C8  | -0.1(5)   | C16 | C17 | C18 | C19  | 0.5(8)    |
| C1   | C2   | C9  | C10 | 90.2(6)   | C17 | C16 | C21 | C20  | 0.2(7)    |
| C2   | C3   | C4  | C5  | -178.8(5) | C17 | C18 | C19 | C20  | 0.2(8)    |
| C2   | C3   | C8  | N1  | -0.7(5)   | C18 | C19 | C20 | C21  | -0.7(8)   |
| C2   | C3   | C8  | C7  | 178.9(5)  | C18 | C19 | C20 | C22  | 179.2(5)  |
| C2   | C9   | C10 | N2  | -64.6(6)  | C19 | C20 | C21 | C16  | 0.5(8)    |
| C2   | C9   | C10 | C11 | 59.7(6)   | C19 | C20 | C22 | F4   | 124.7(7)  |
| C3   | C2   | C9  | C10 | -91.4(6)  | C19 | C20 | C22 | F5   | 7.7(9)    |
| C3   | C4   | C5  | C6  | 1.0(9)    | C19 | C20 | C22 | F6   | -113.6(9) |
| C4   | C3   | C8  | N1  | -178.1(4) | C21 | C16 | C17 | C18  | -0.7(8)   |
| C4   | C3   | C8  | C7  | 1.5(8)    | C21 | C20 | C22 | F4   | -55.4(8)  |
| C4   | C5   | C6  | C7  | 1.1(10)   | C21 | C20 | C22 | F5   | -172.4(6) |
| C5   | C6   | C7  | C8  | -1.8(9)   | C21 | C20 | C22 | F6   | 66.2(9)   |
| C6   | C7   | C8  | N1  | -179.9(5) | C22 | C20 | C21 | C16  | -179.4(5) |
| C6   | C7   | C8  | C3  | 0.5(8)    |     |     |     |      |           |

Table 8 Hydrogen Atom Coordinates ( $\text{\AA} \times 10^4$ ) and Isotropic Displacement Parameters ( $\text{\AA}^2 \times 10^3$ ) for A.

| Atom | x       | y       | z       | U(eq) |
|------|---------|---------|---------|-------|
| H1   | 401.24  | 5210.98 | 8963.43 | 36    |
| H2   | 5337.9  | 5546.63 | 9044.66 | 37    |
| H4   | 2359.86 | 576.25  | 7547.14 | 38    |
| H5   | 401.04  | -669.85 | 8116.14 | 48    |

|      |          |         |         |    |
|------|----------|---------|---------|----|
| H6   | -1406.36 | 459.56  | 8979.14 | 50 |
| H7   | -1341.61 | 2869.17 | 9255.18 | 42 |
| H9A  | 4284.23  | 4018.01 | 6892.74 | 39 |
| H9B  | 3972.49  | 2410.16 | 6822.53 | 39 |
| H10  | 6388.3   | 3478    | 7556.91 | 35 |
| H12A | 5415.73  | -565.25 | 8110.49 | 80 |
| H12B | 4205.37  | 145.26  | 8755.34 | 80 |
| H12C | 5892.8   | 679.61  | 9174.04 | 80 |
| H14A | 8499.8   | 7965.68 | 9538.54 | 56 |
| H14B | 6868.91  | 7691.31 | 9848.2  | 56 |
| H14C | 7166.53  | 8043.96 | 8836.36 | 56 |
| H15A | 424.85   | 6617.18 | 7295.07 | 43 |
| H15B | 1661.93  | 7221.69 | 6698.17 | 43 |
| H17  | 2998.44  | 5392.71 | 5478.23 | 41 |
| H19  | 554.3    | 1393.06 | 4160.1  | 42 |
| H21  | -827.36  | 4227.13 | 6593.14 | 38 |

## 7. NMR spectra

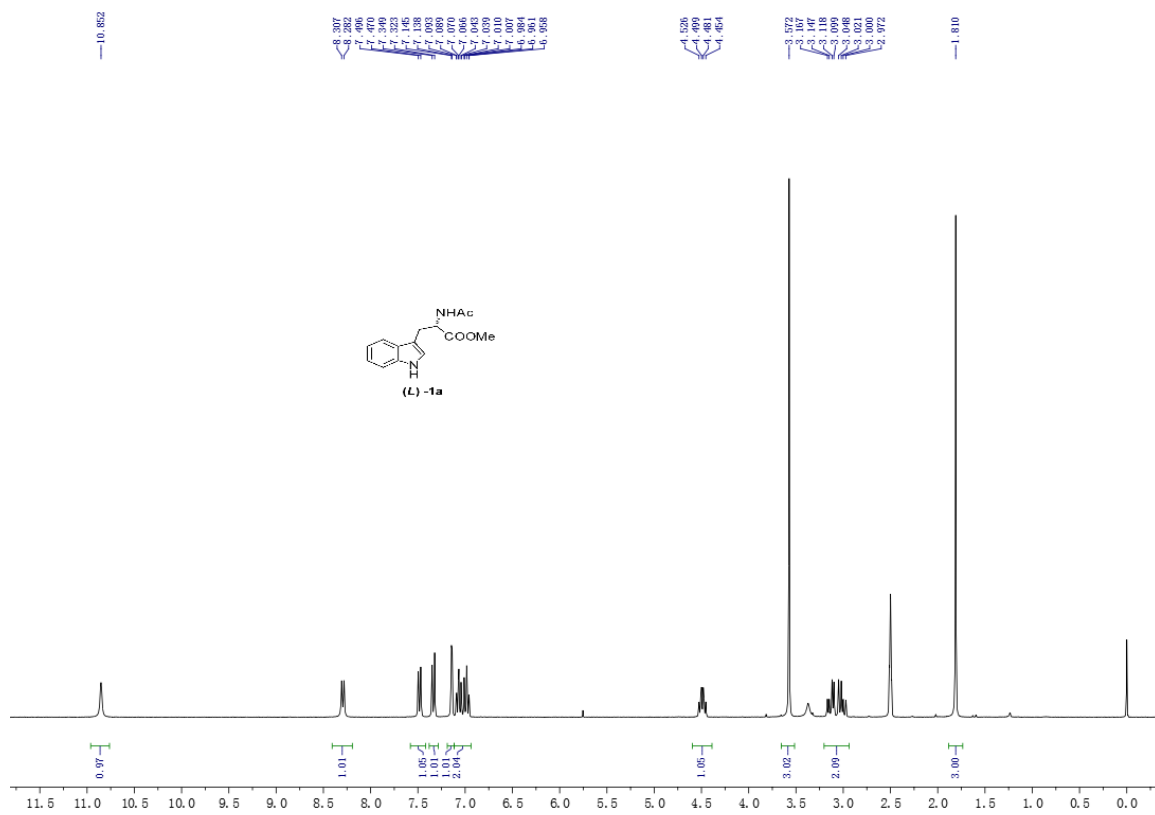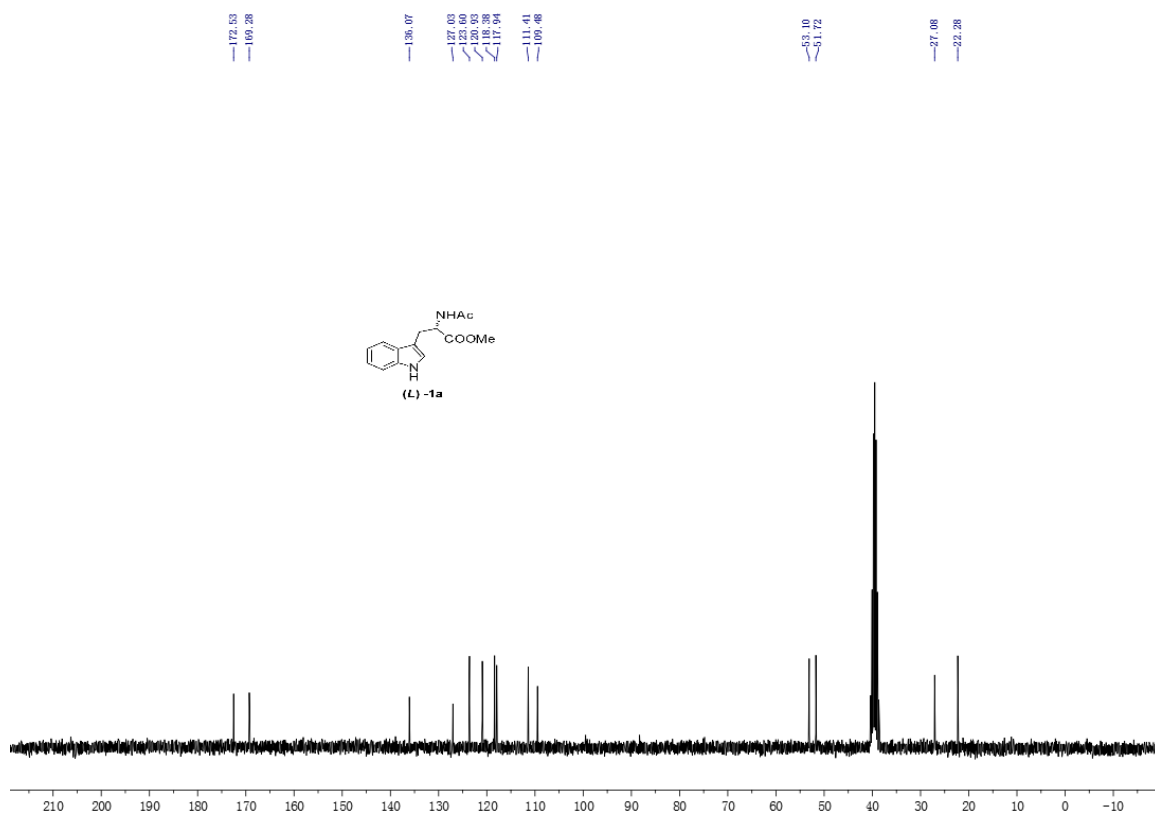

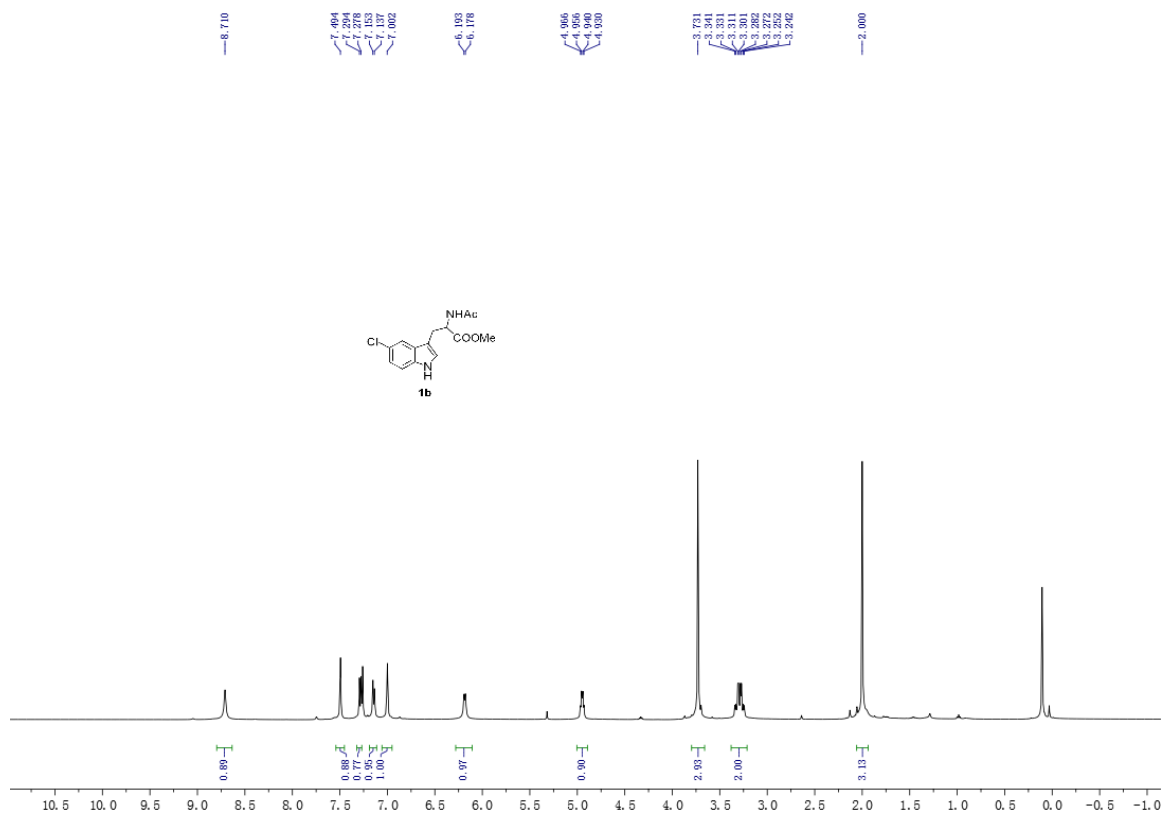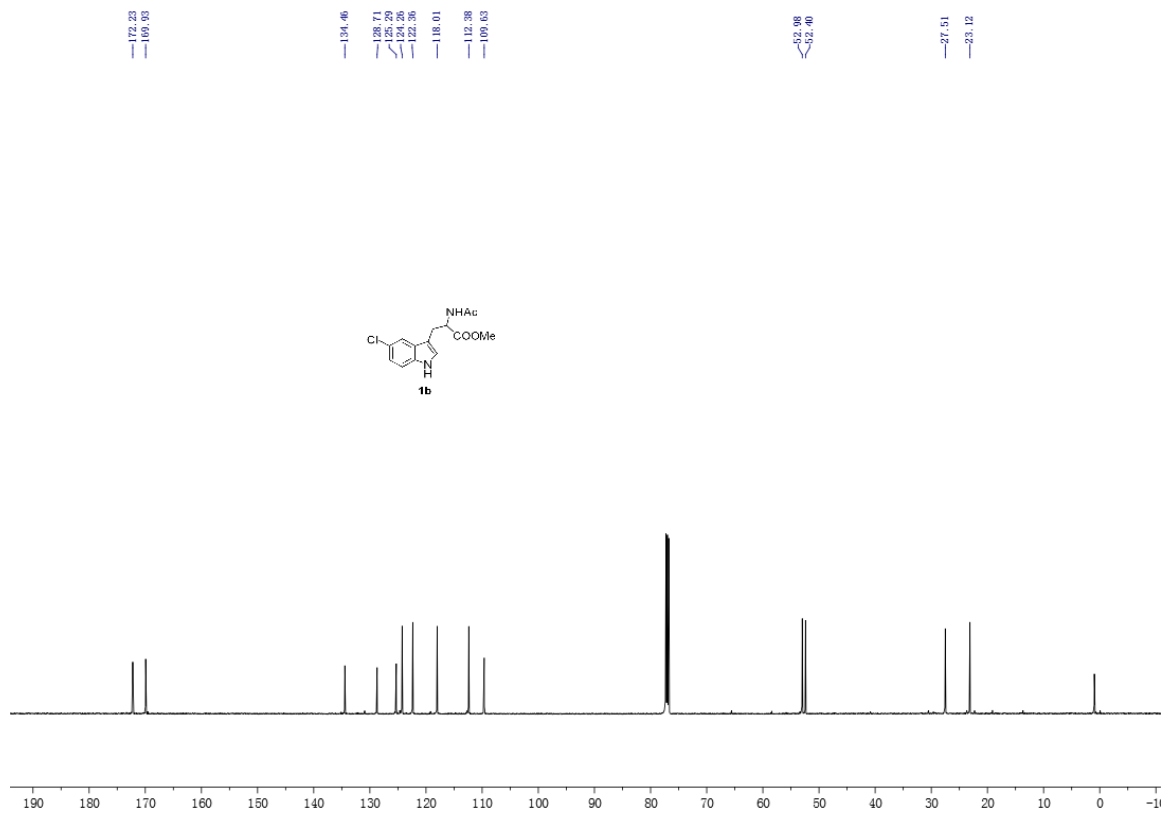

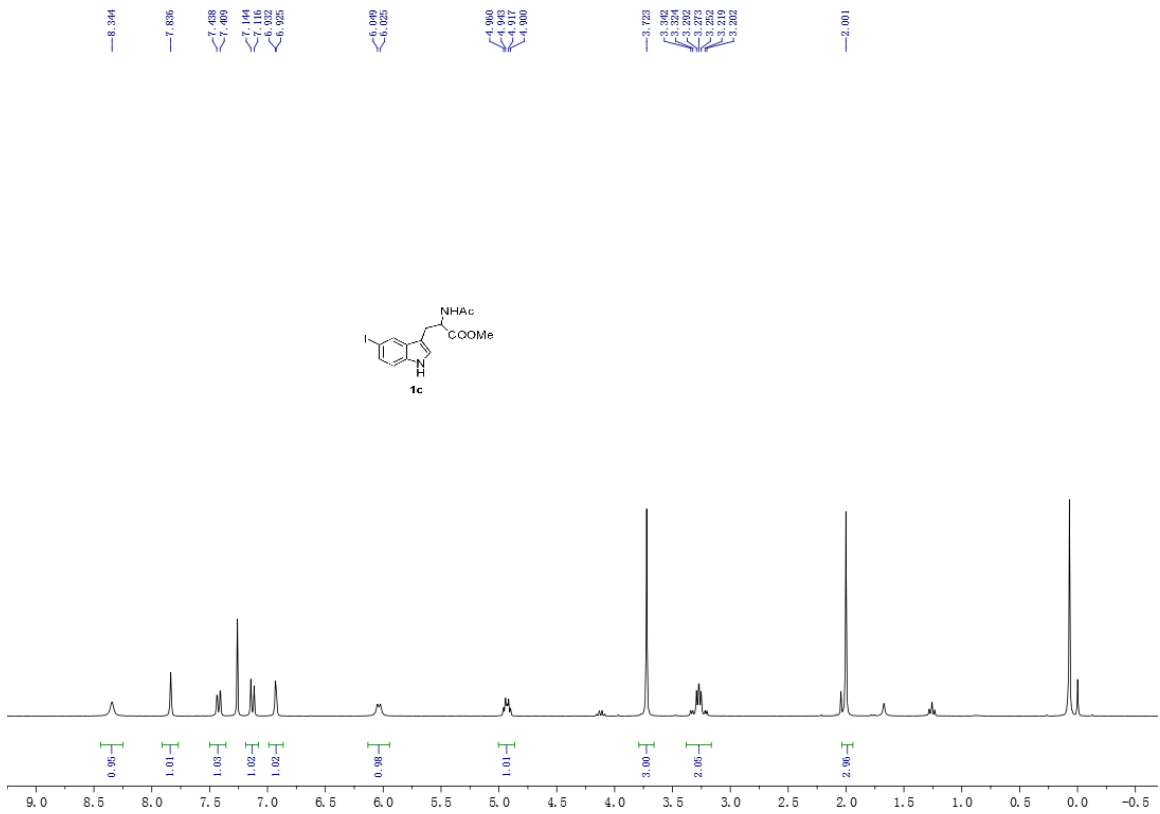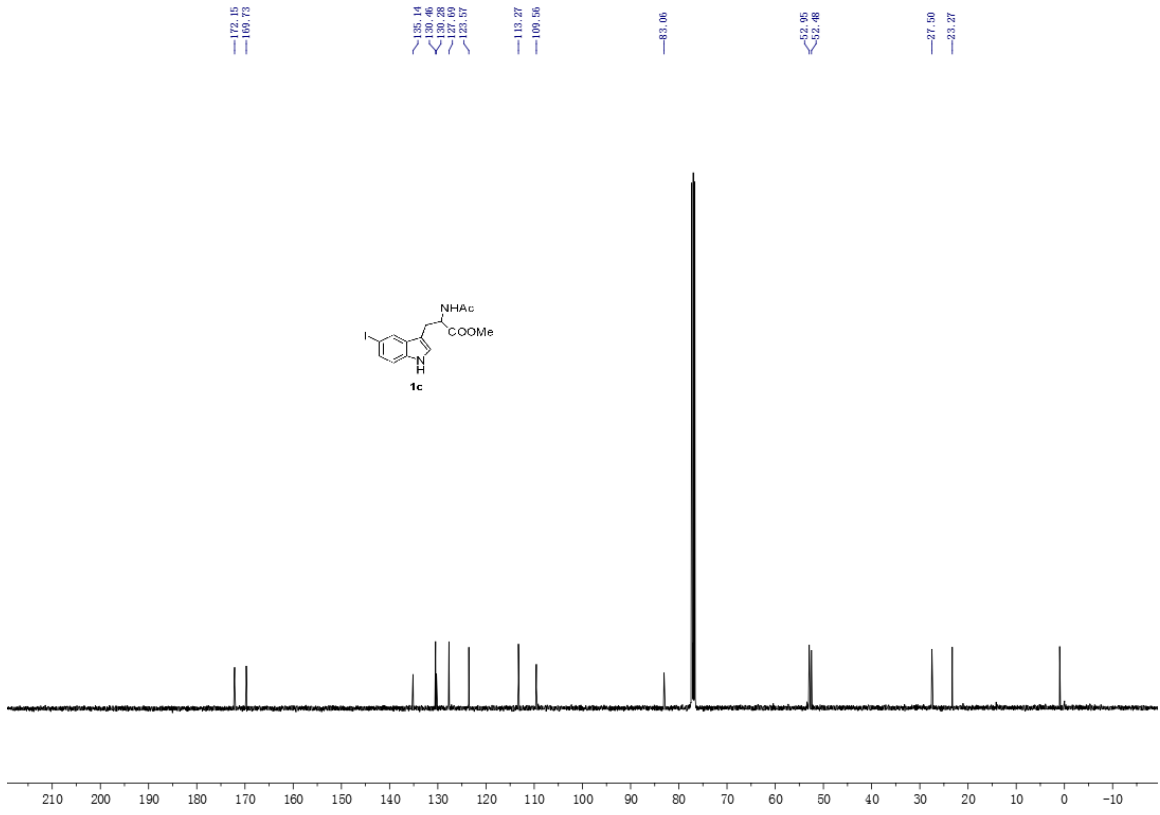



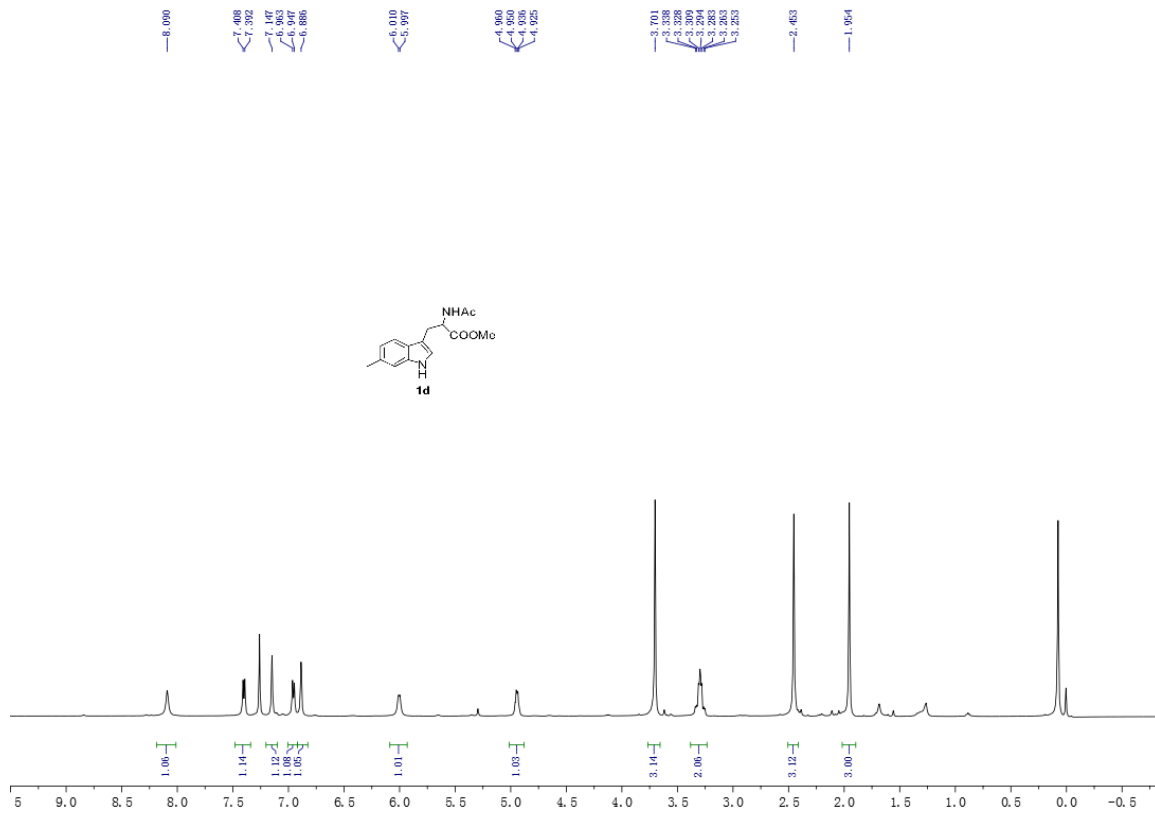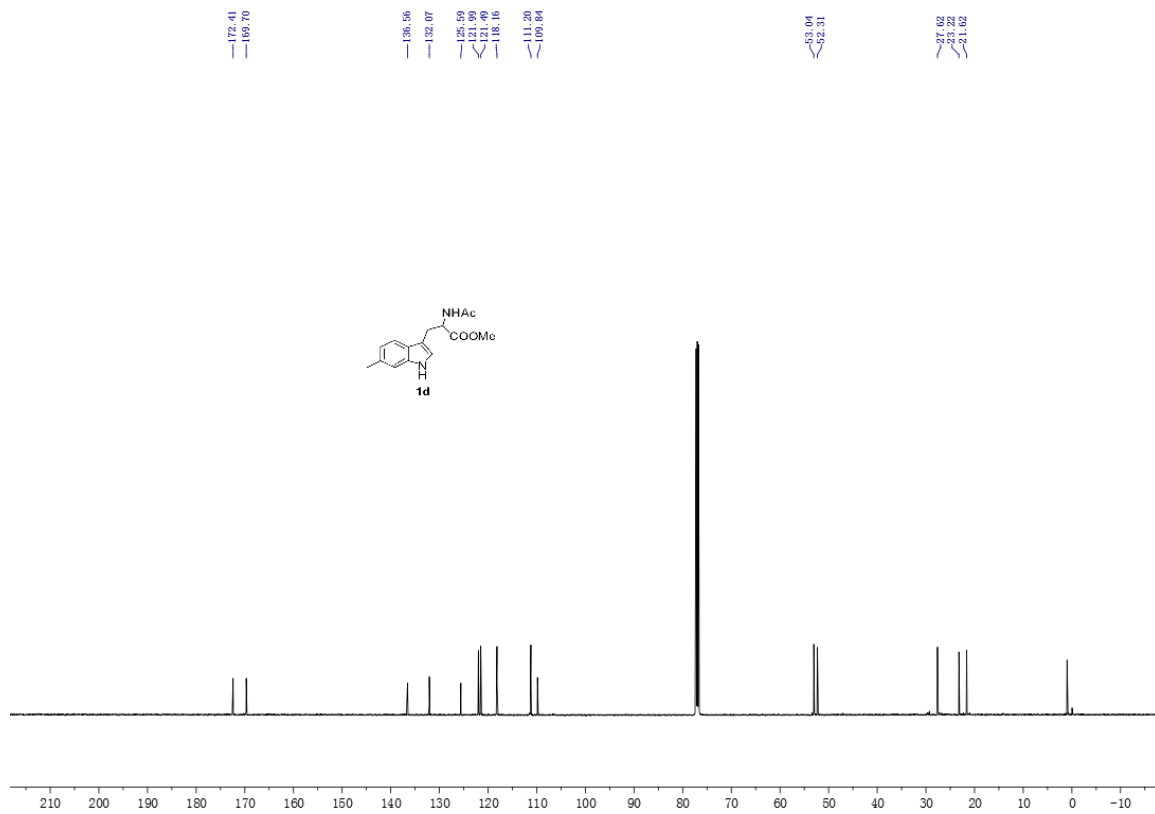

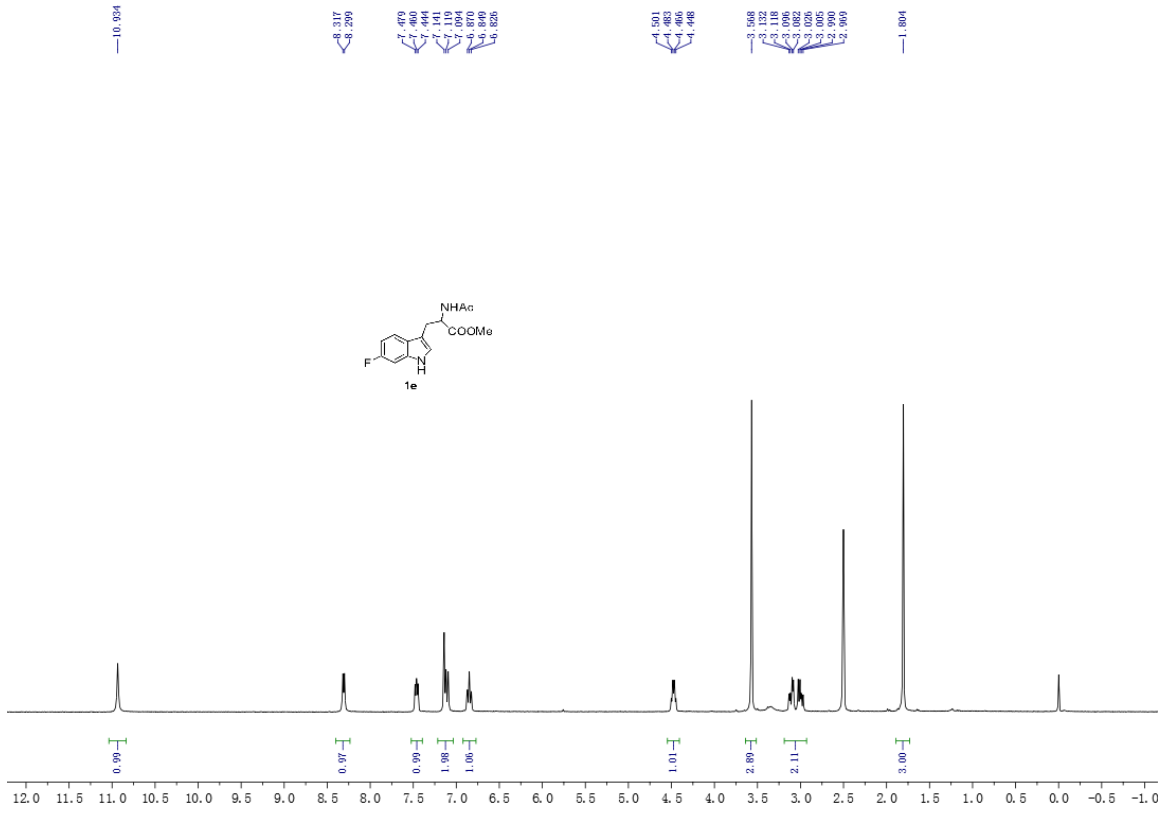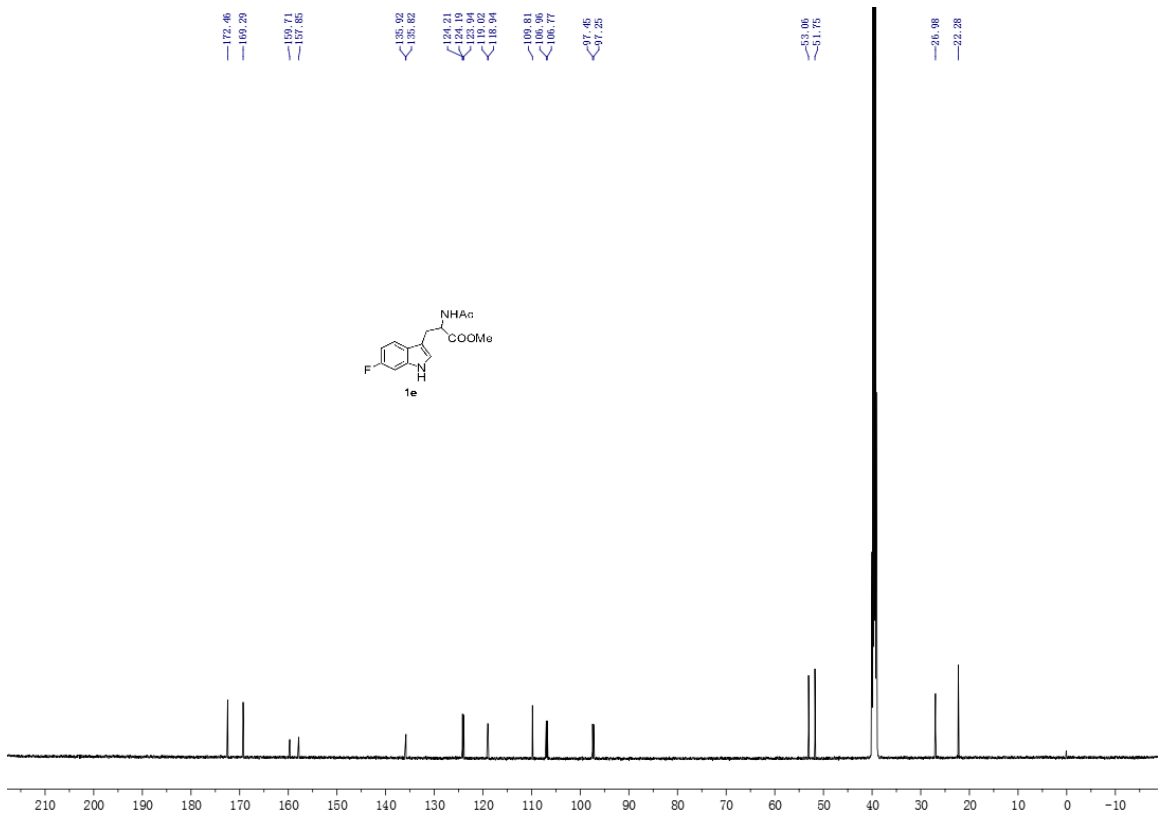

-121.006

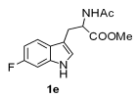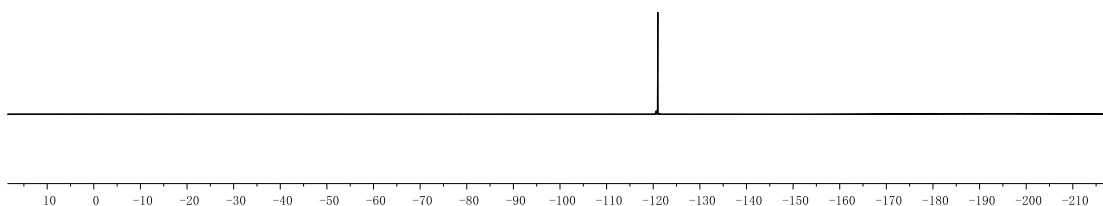

-8.173

7.441  
7.413  
7.322  
7.307  
7.104

7.098  
7.070  
6.968  
6.960

-5.001

-5.968

-4.968

-4.960

-4.924

-4.906

-3.695

-3.321

-3.262

-3.312

-3.292

-3.262

-3.226

-1.968

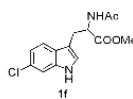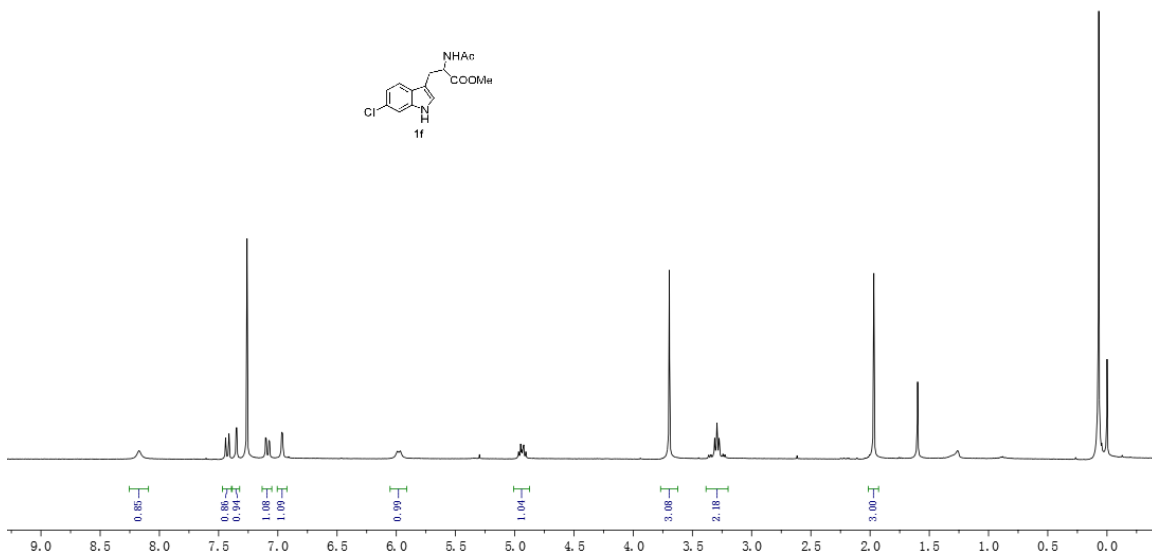

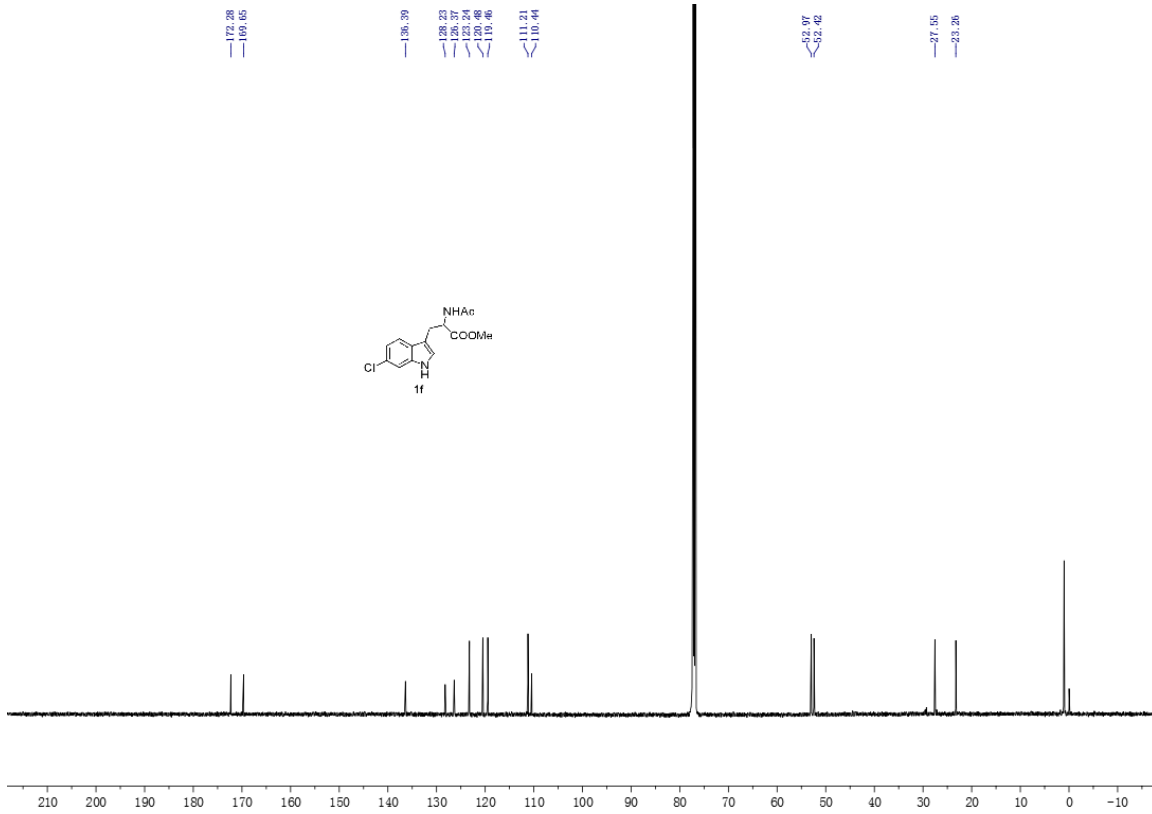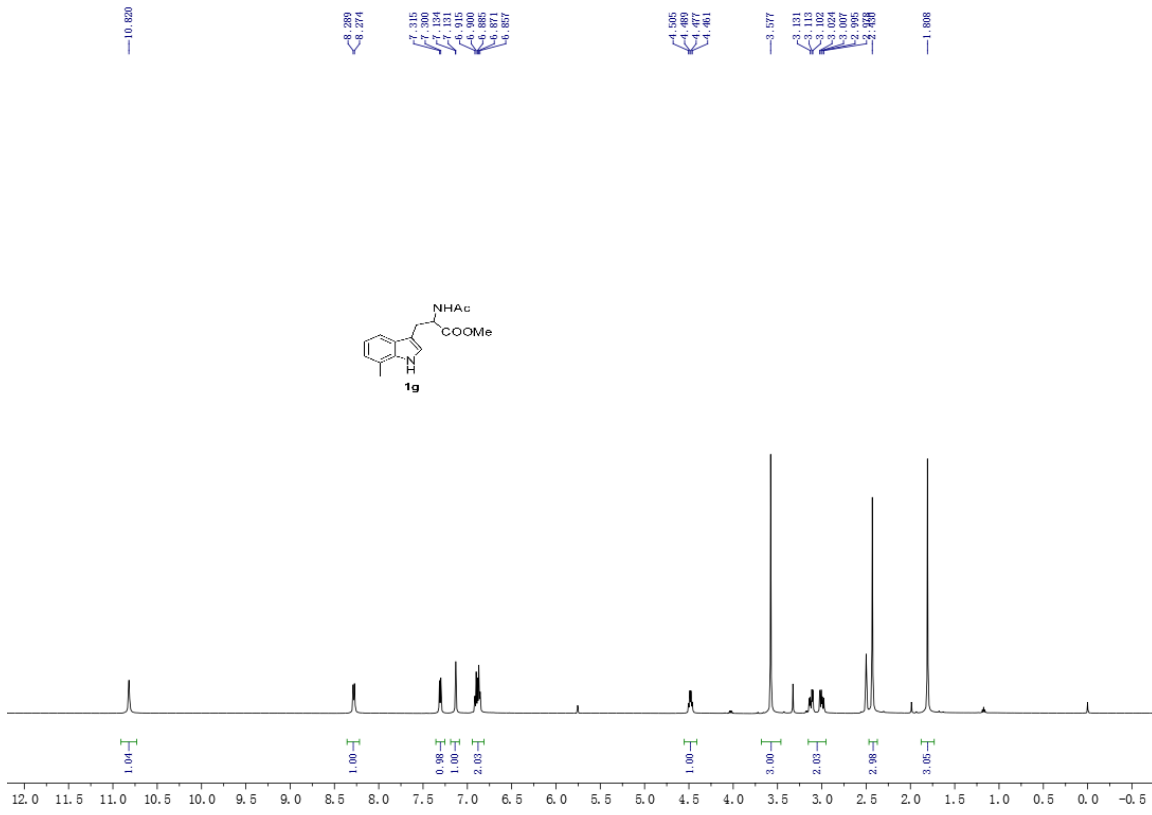

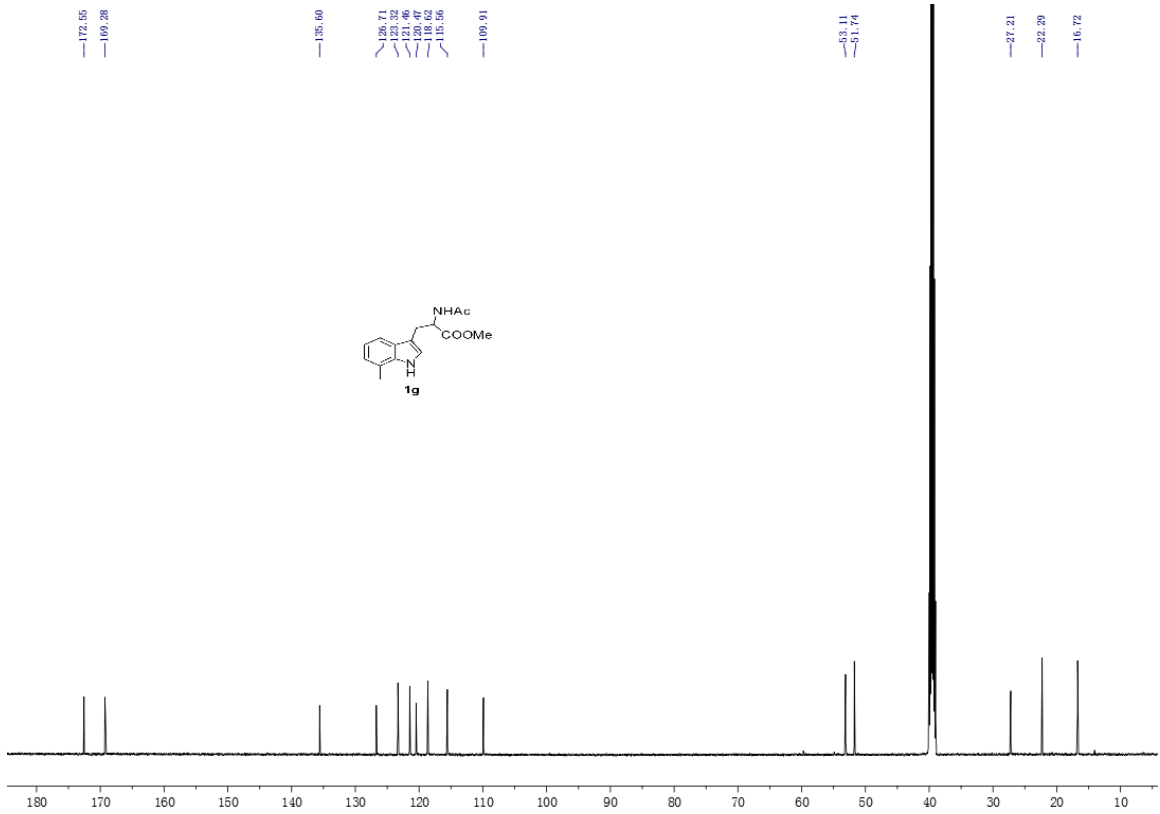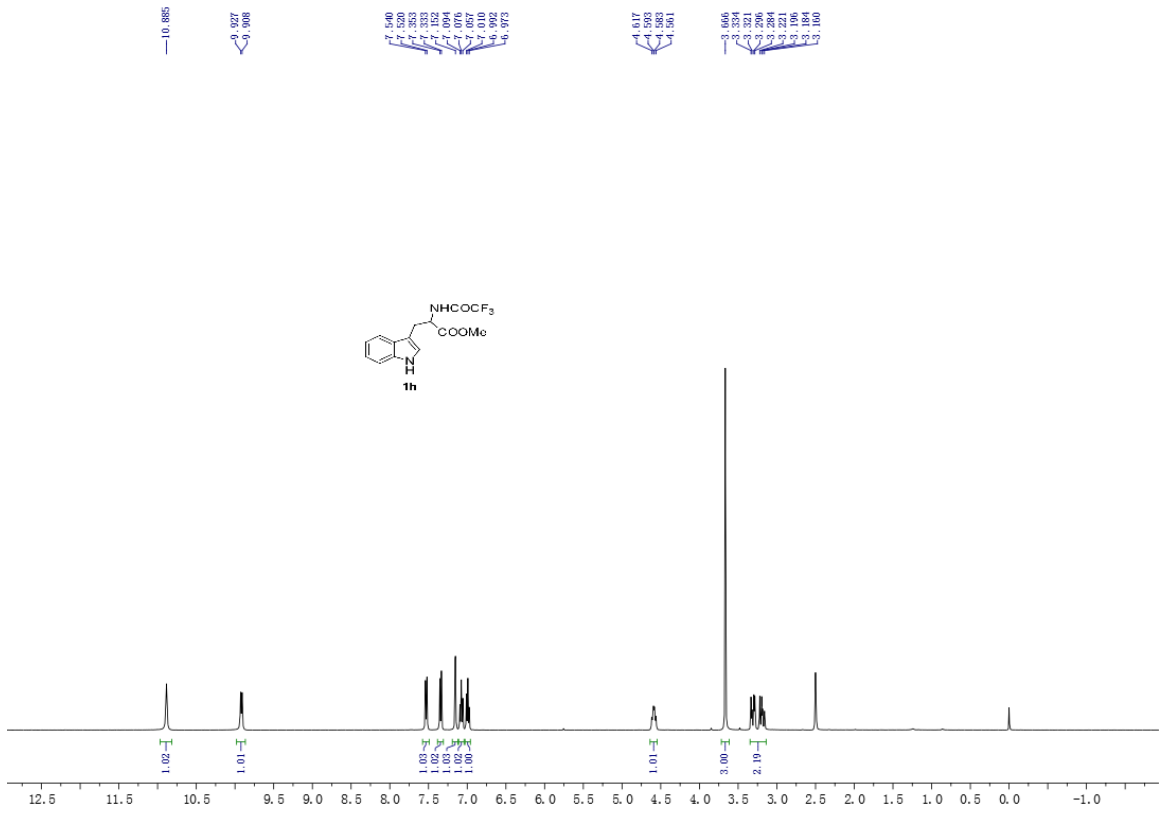

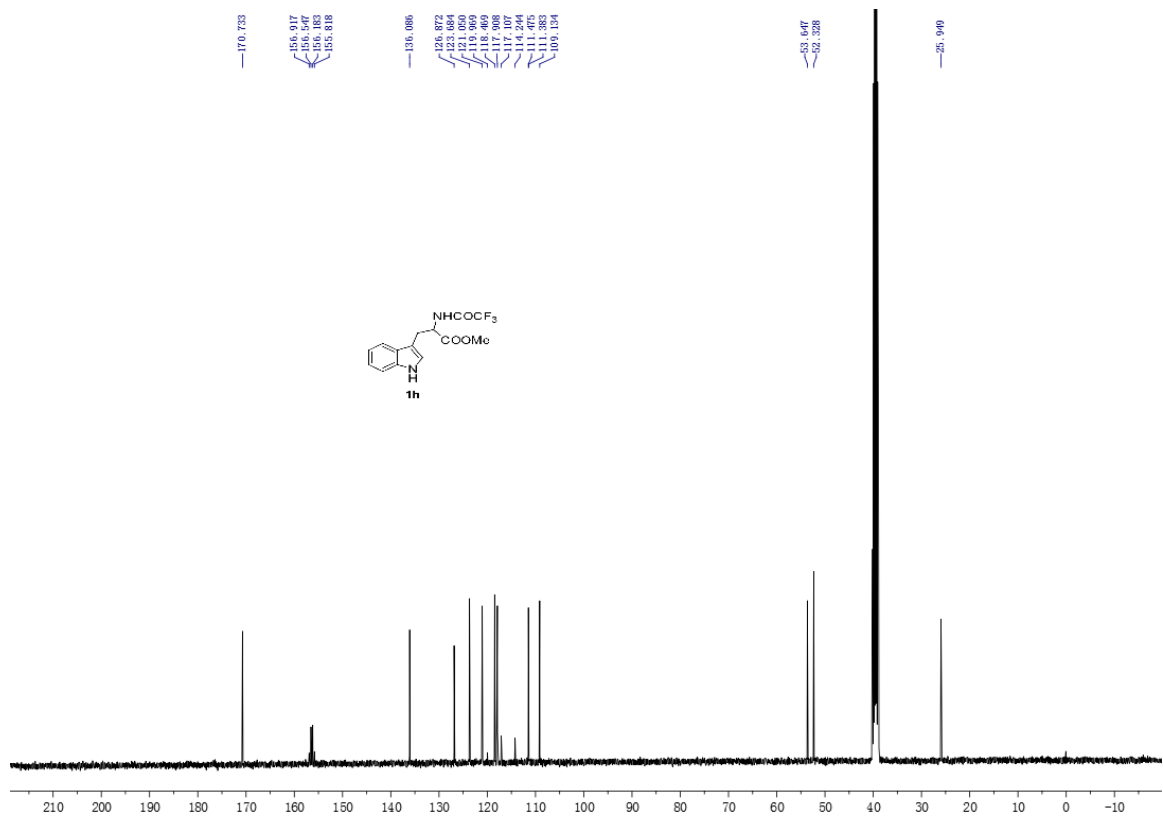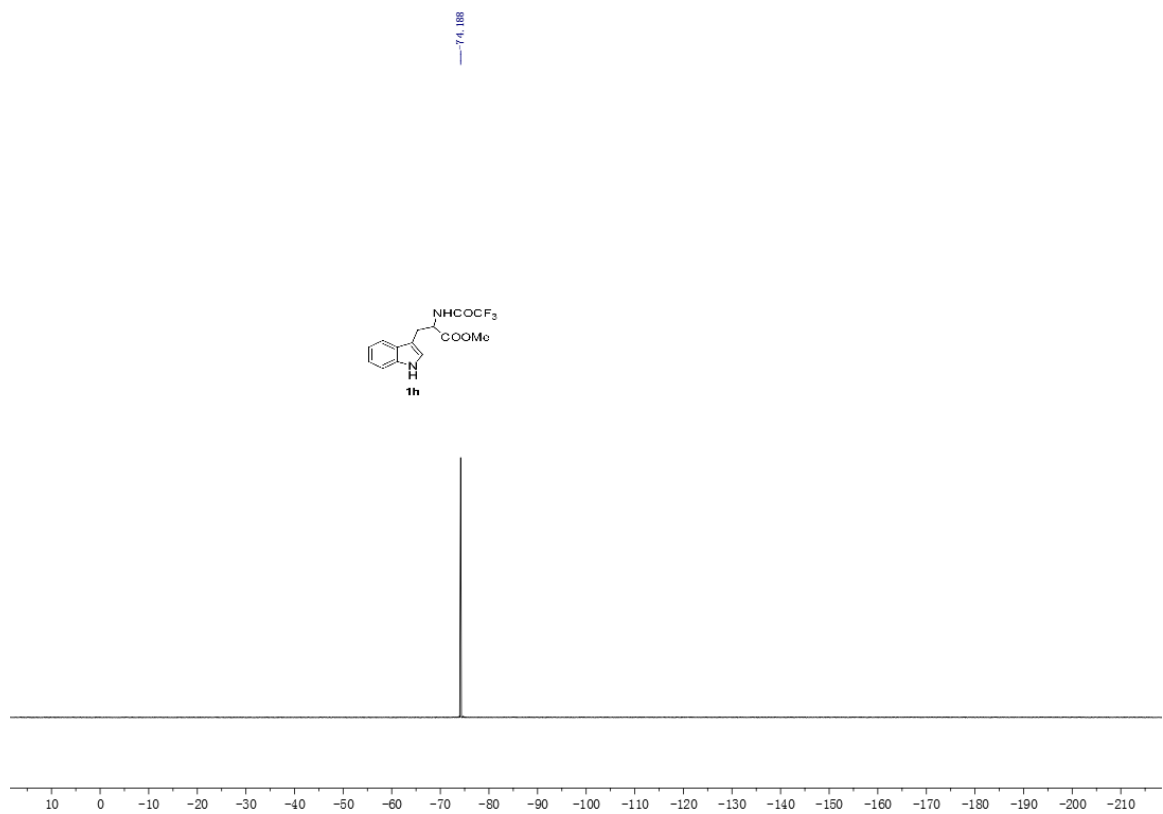

10.887

7.890  
7.872  
7.686  
7.666  
7.646  
7.552  
7.532  
7.512  
7.416  
7.404  
7.374  
7.353  
7.343  
7.322  
7.305  
7.287  
7.191  
7.182  
7.084  
6.943  
6.917  
6.988  
6.980

4.349  
4.332  
4.315  
4.293  
4.282  
4.261  
4.251  
4.236  
3.891  
3.619  
3.520  
3.500  
3.183  
3.171  
3.077  
3.064  
3.040

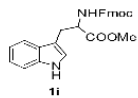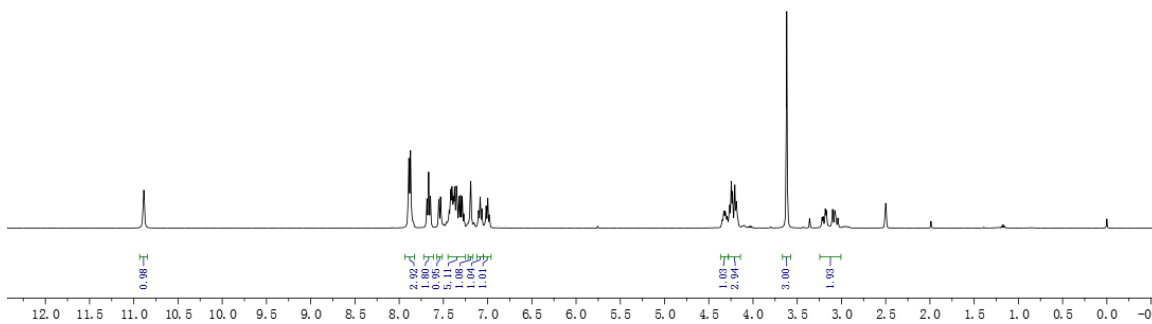

172.71  
155.92  
143.74  
143.71  
140.65  
138.12  
127.60  
127.55  
125.22  
123.77  
120.96  
119.43  
117.98  
111.76  
103.71  
45.65  
55.02  
51.88  
46.58  
26.89

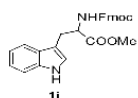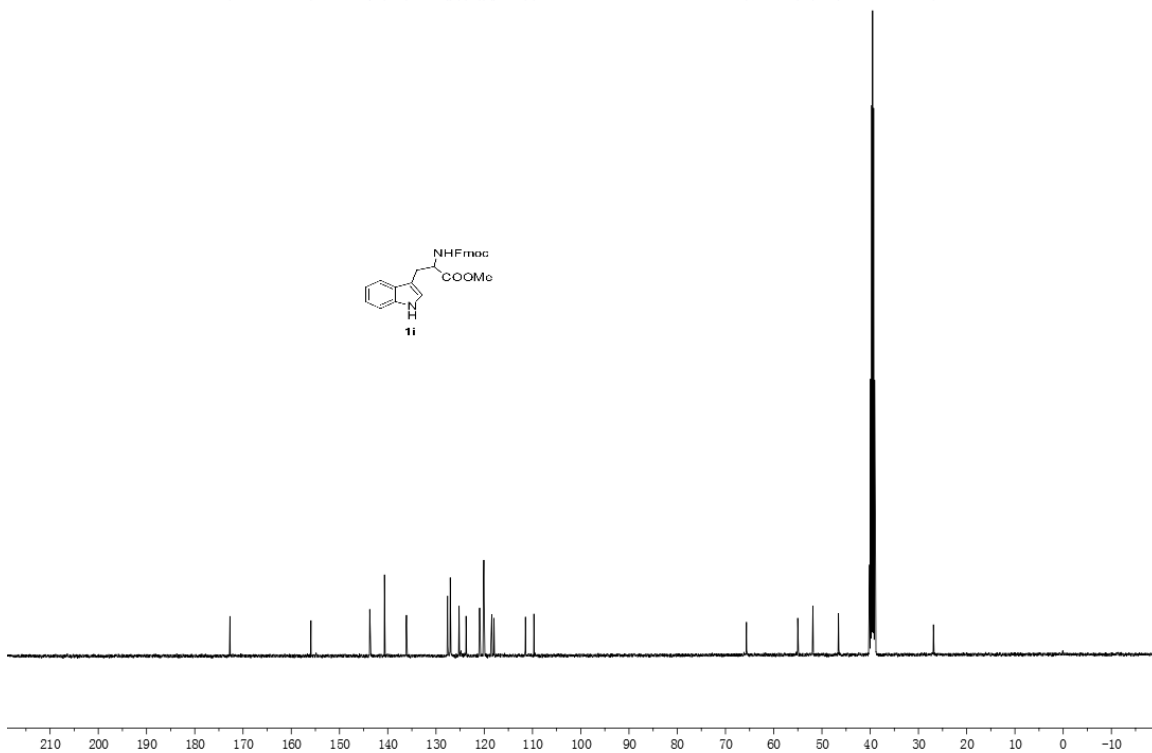

7.249  
7.239  
7.211  
7.199  
7.087  
7.078  
7.058  
7.029  
7.007

-3.007

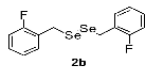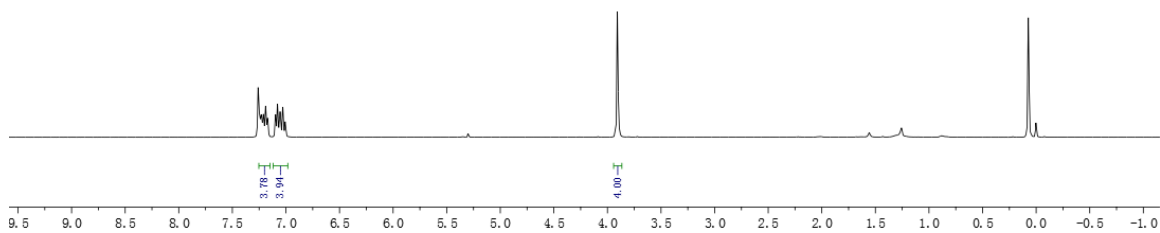

161.87  
159.41

130.99  
130.95  
128.88  
128.88  
126.44  
126.44  
123.93  
123.90  
15.57  
15.36

25.10  
25.08

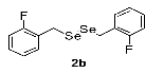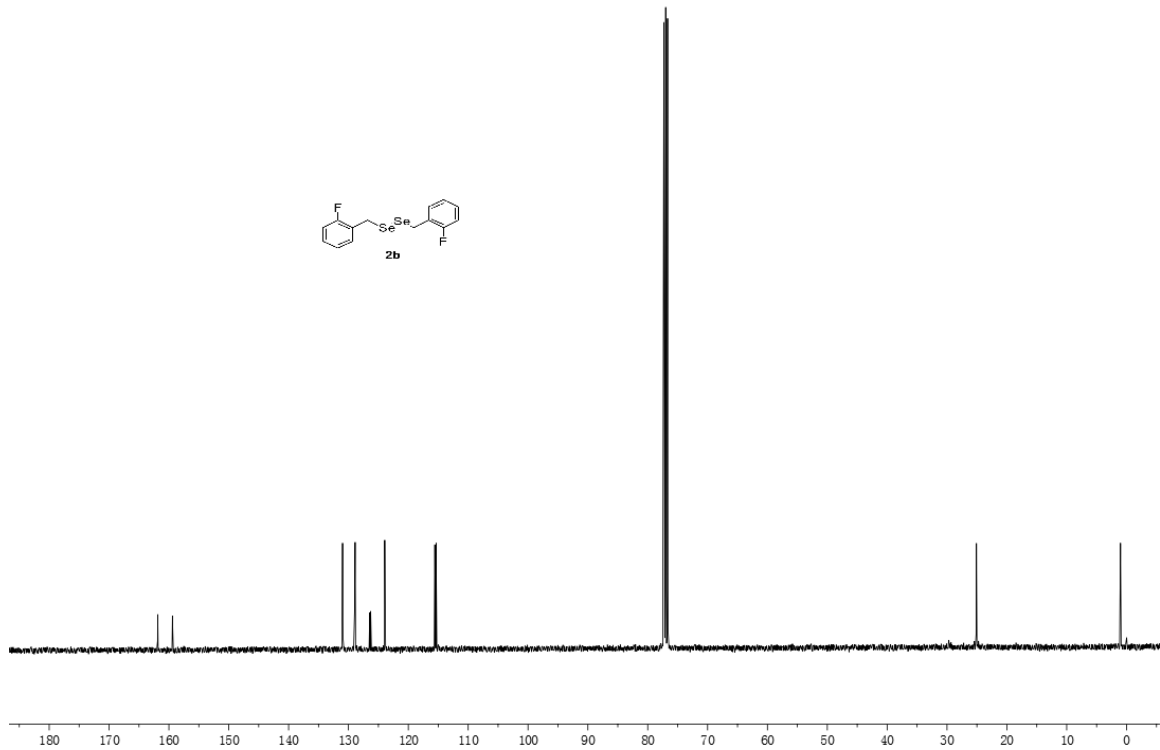



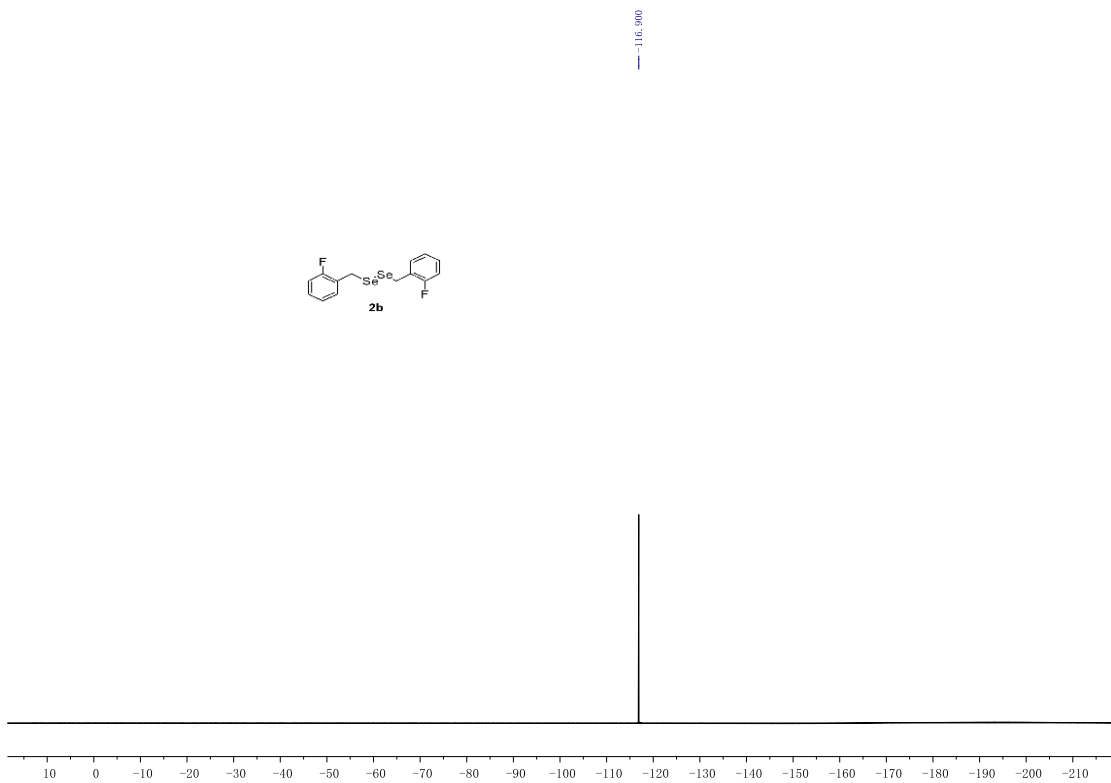

7.359  
7.352  
7.304  
7.298  
7.194

-3.986

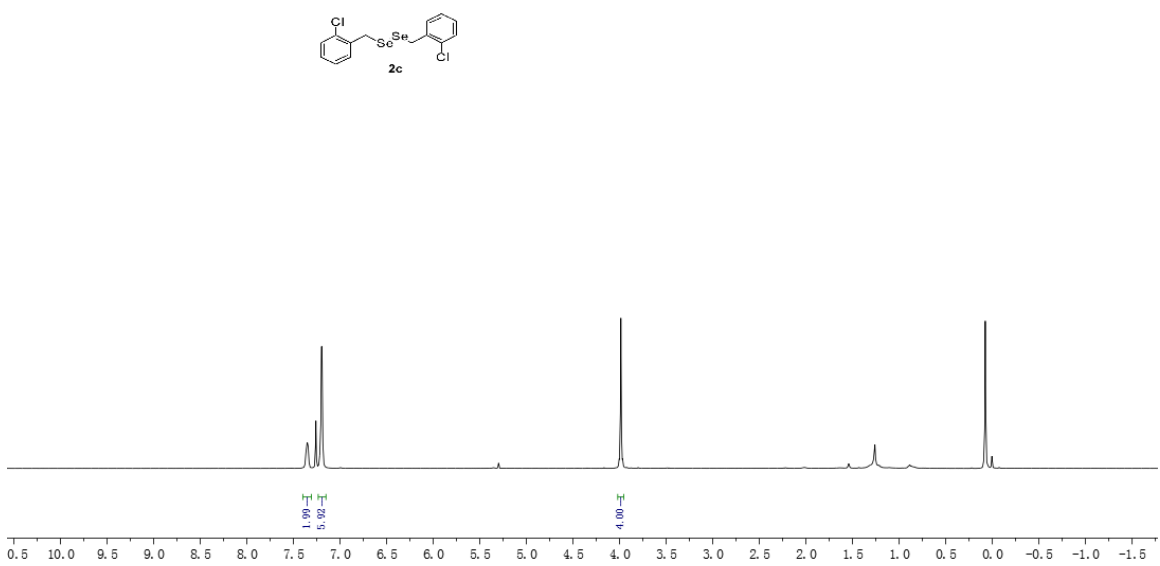

136.72  
133.75  
130.83  
129.14  
126.64

30.48

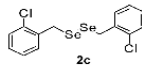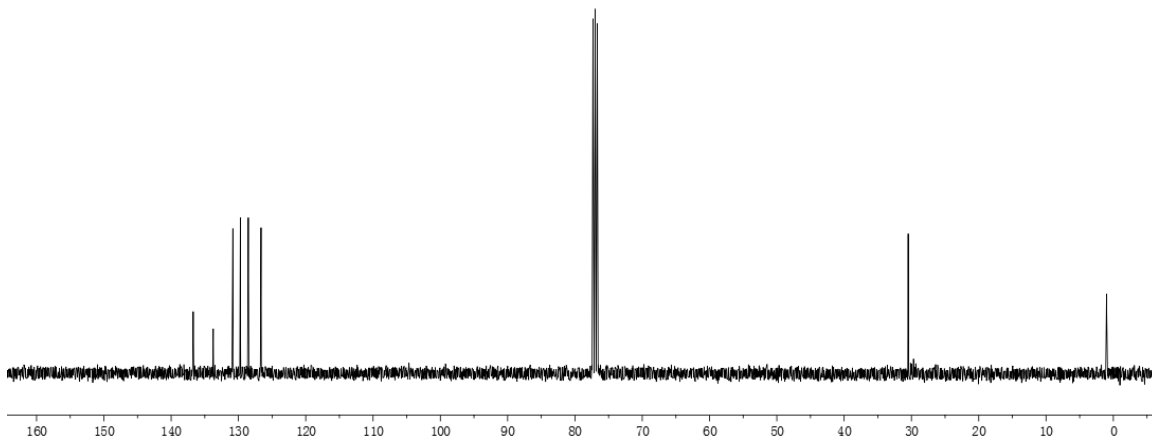

7.829  
7.809  
7.383  
7.295  
7.211  
7.192  
6.992  
6.927  
6.908

3.988

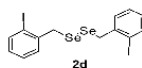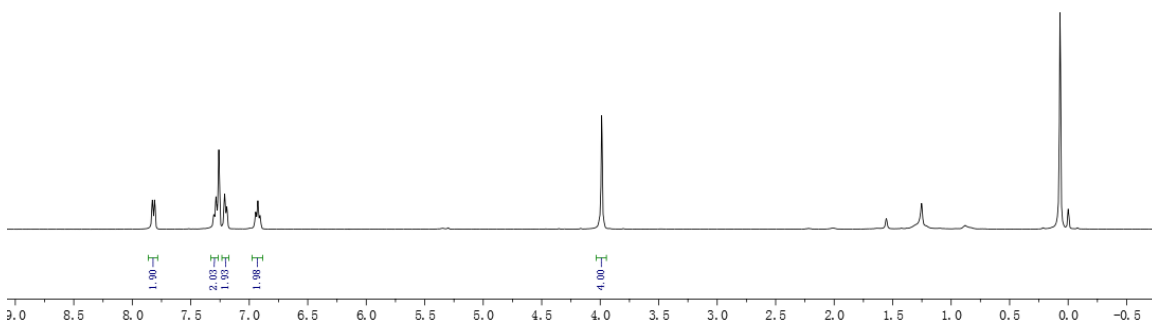

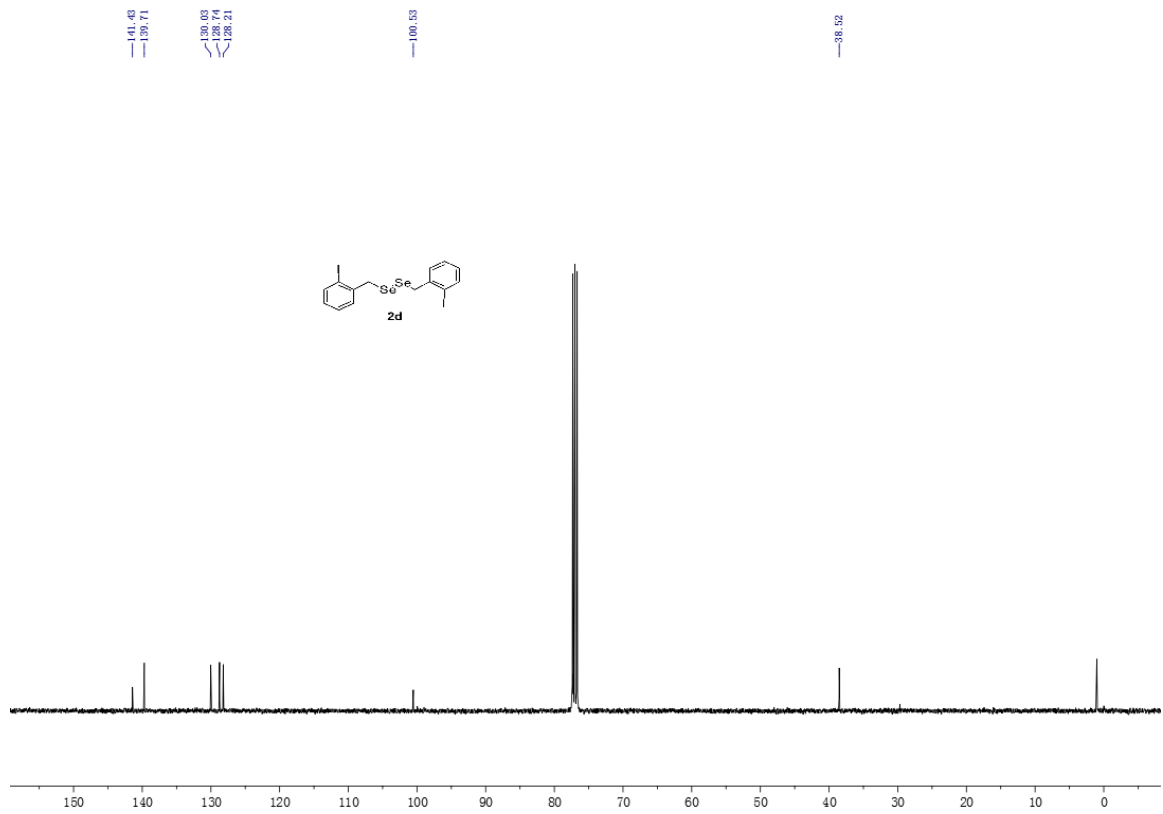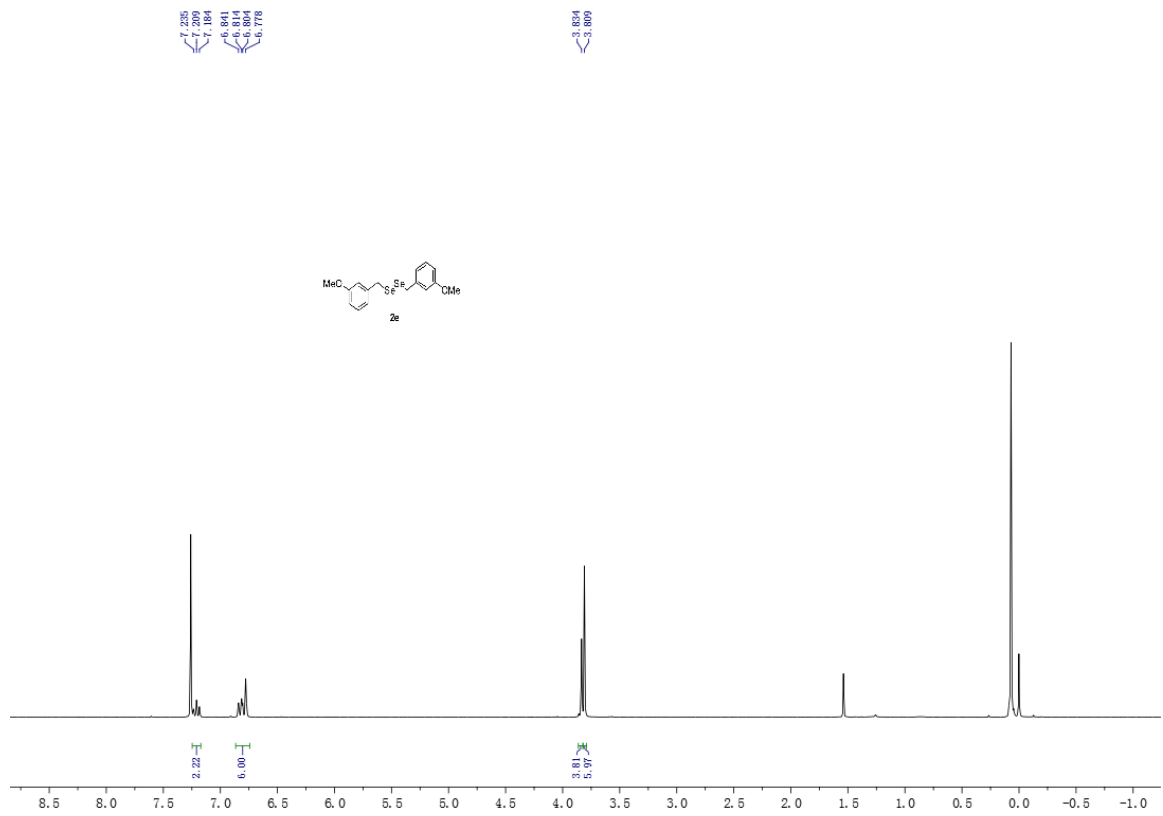

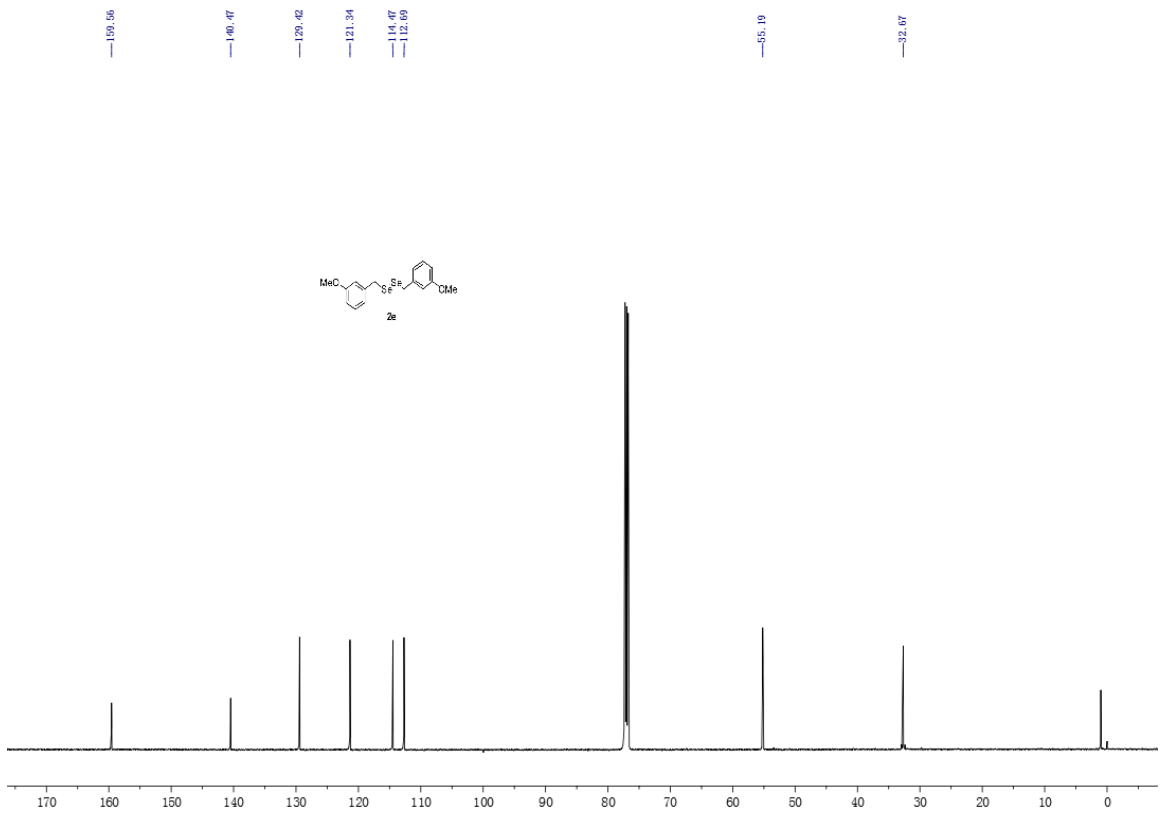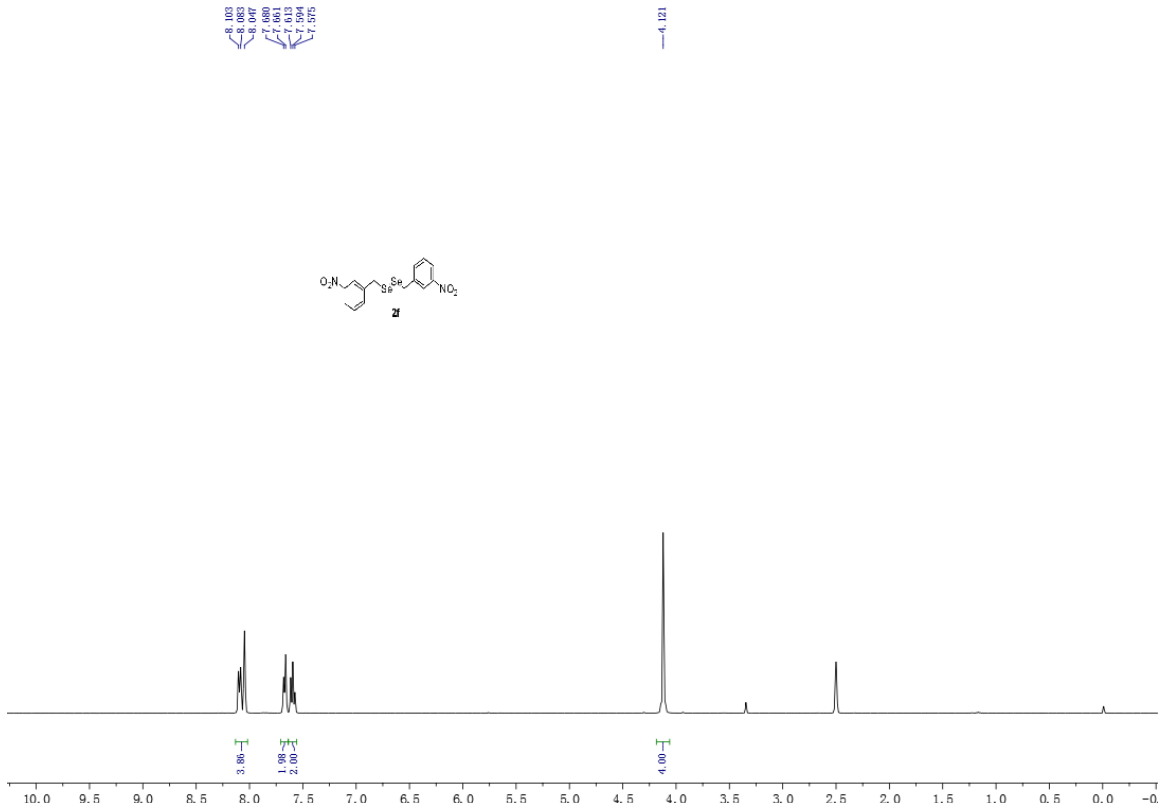

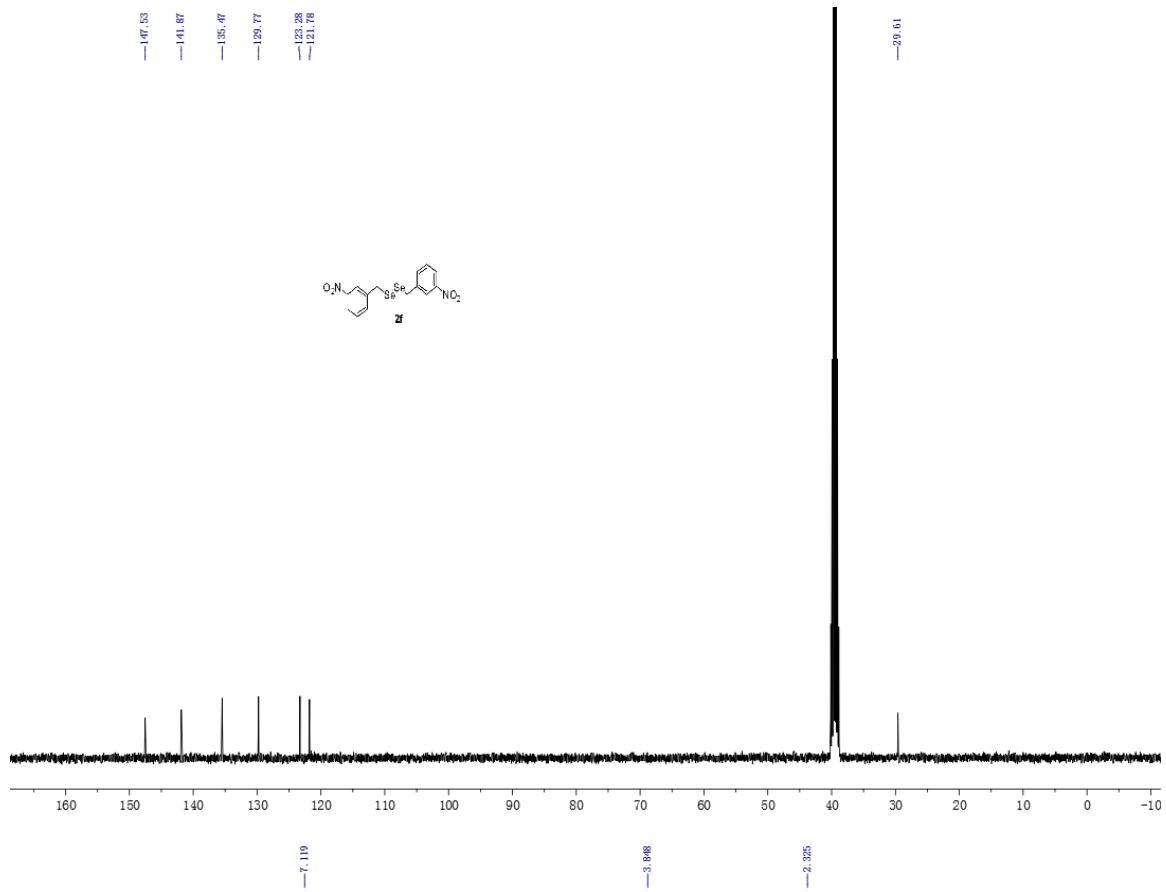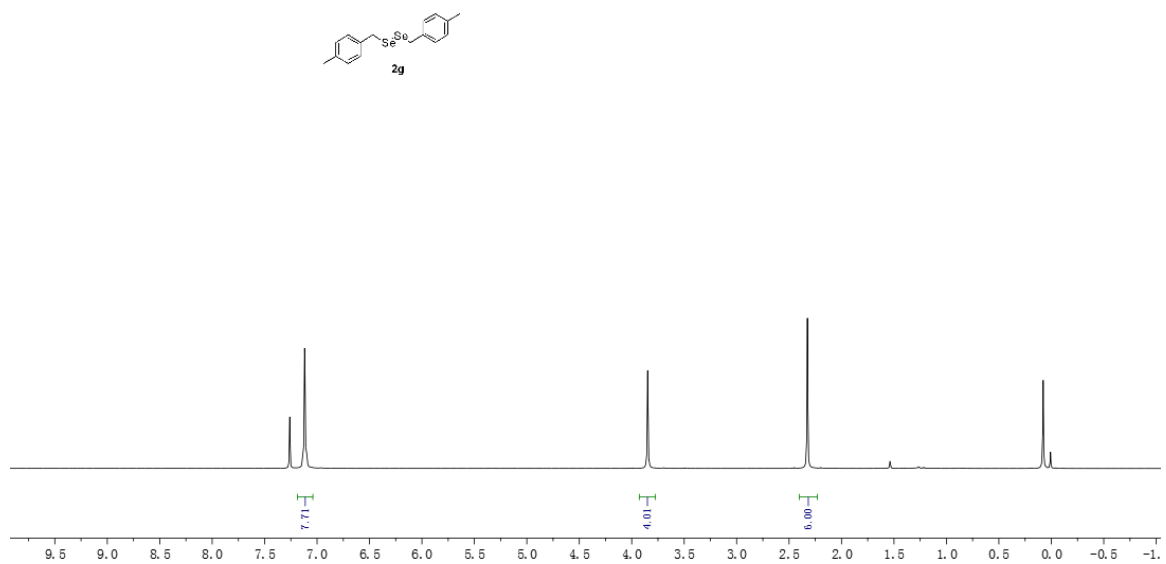

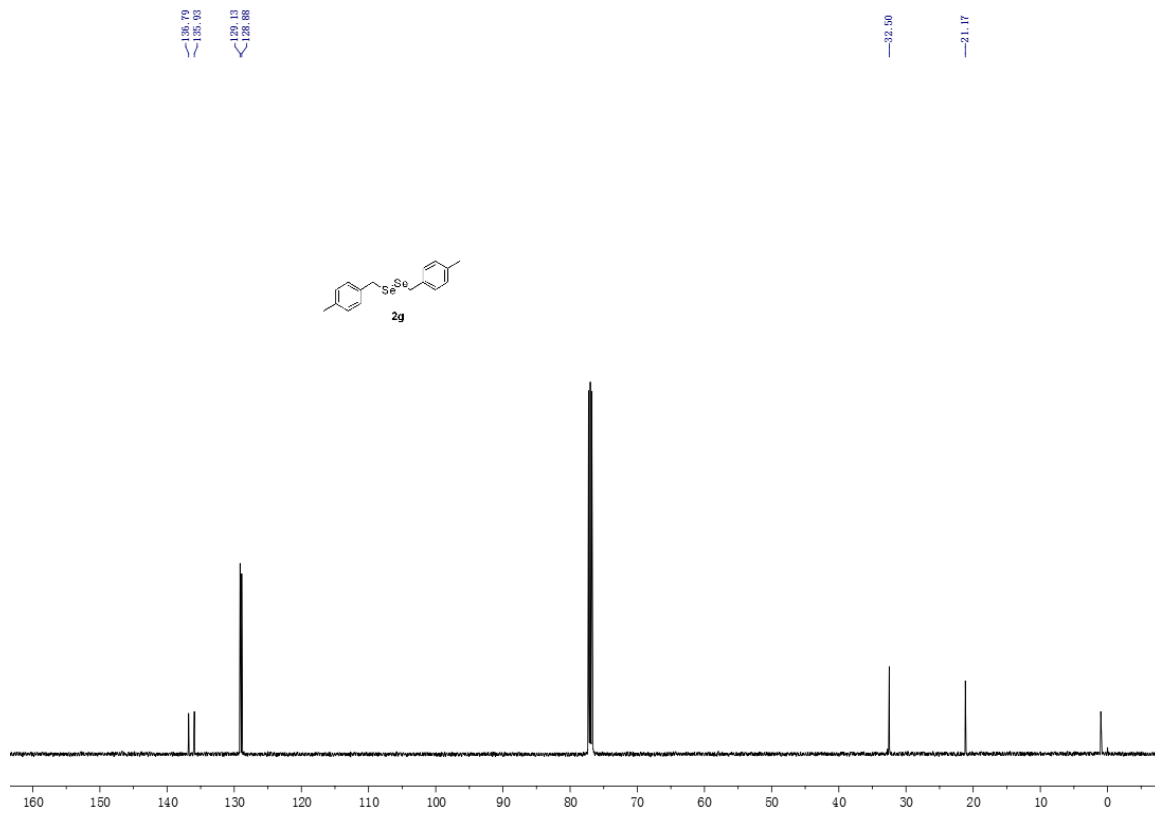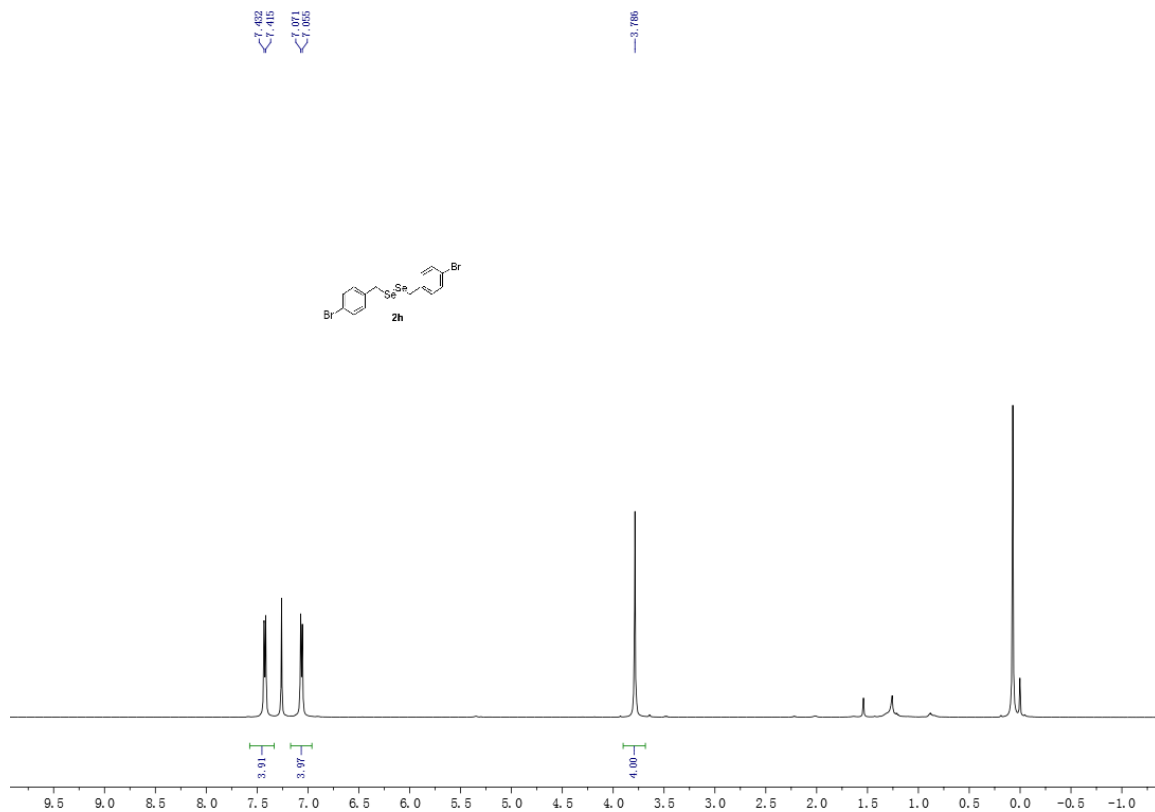

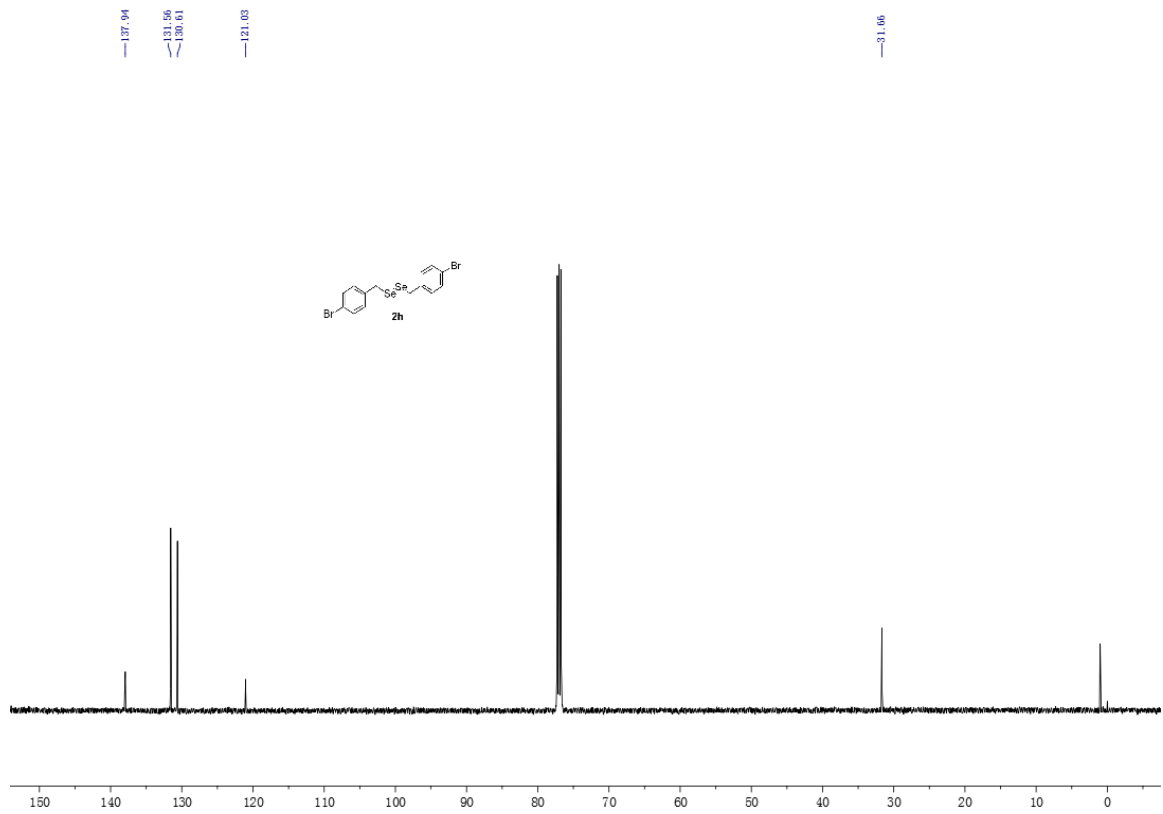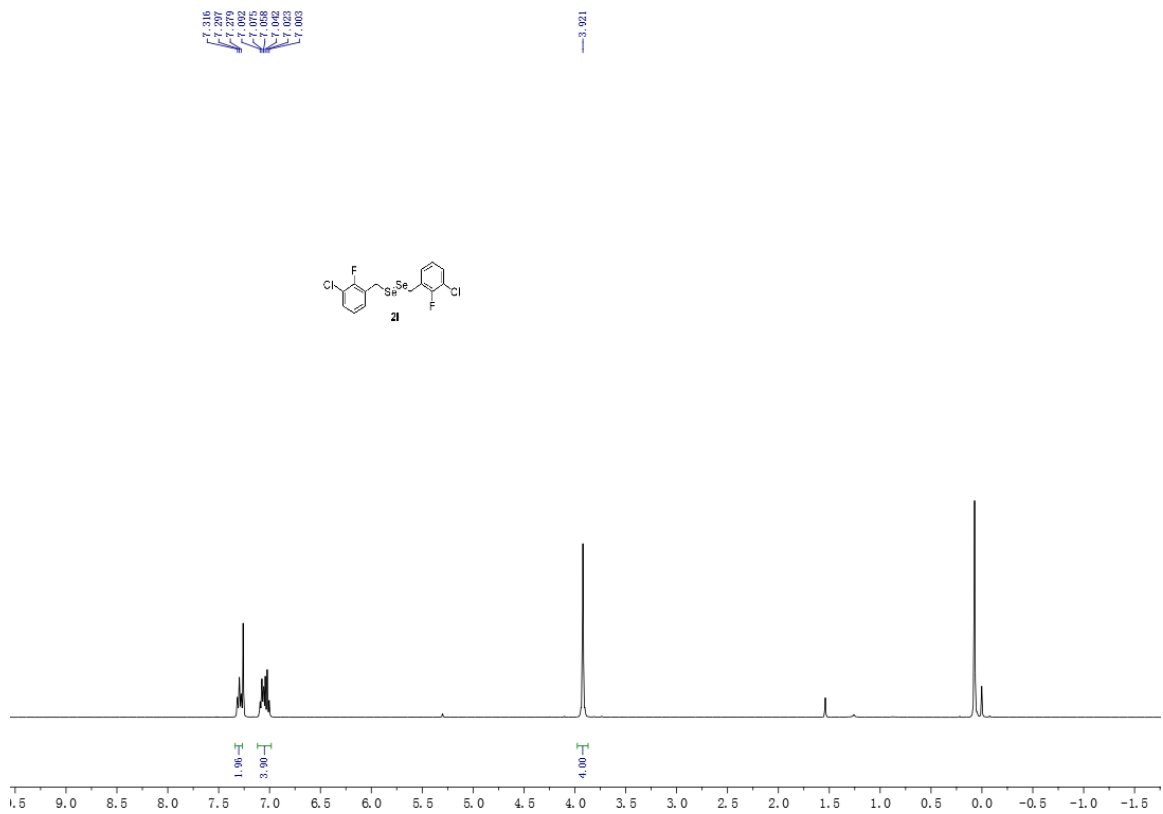

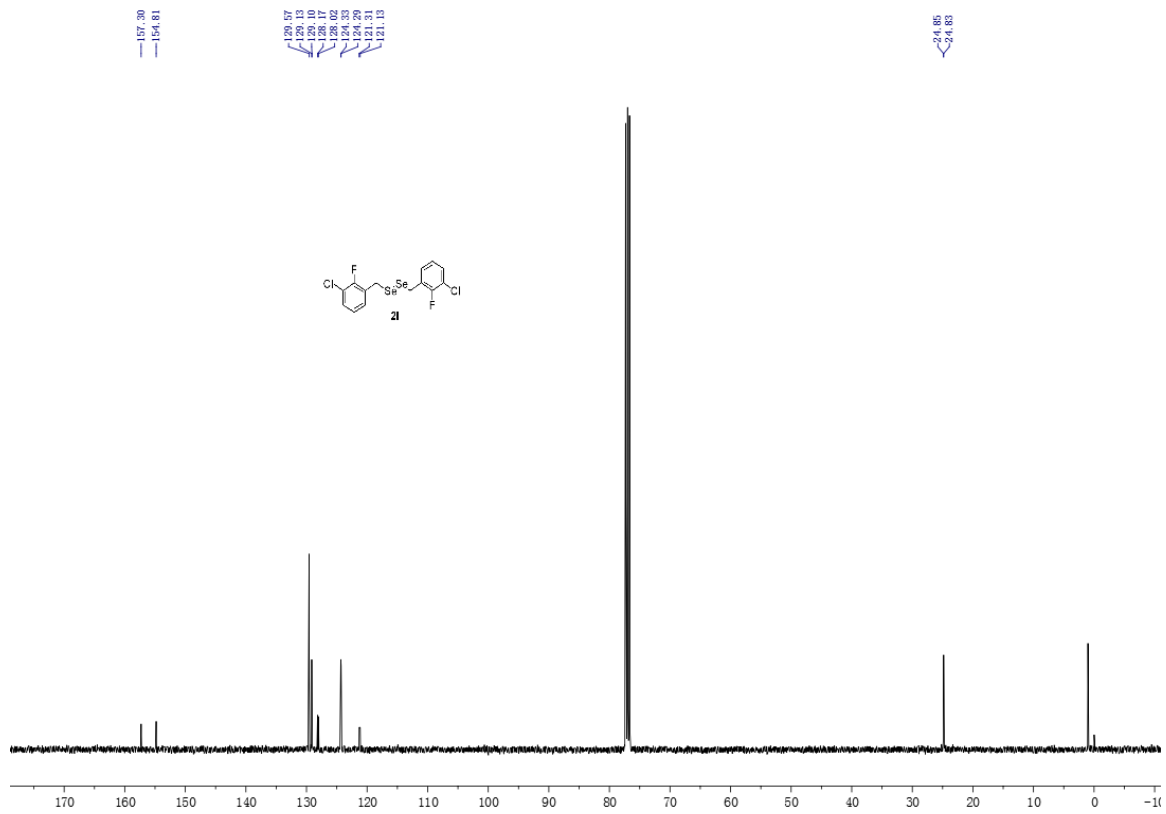

118.895

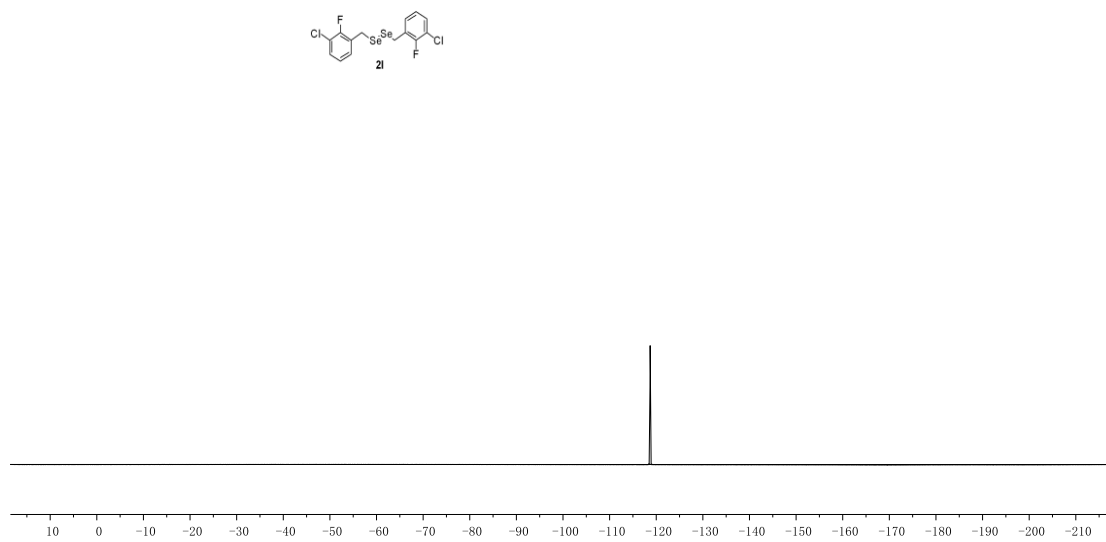



7.781  
7.612

3.861

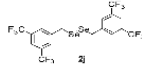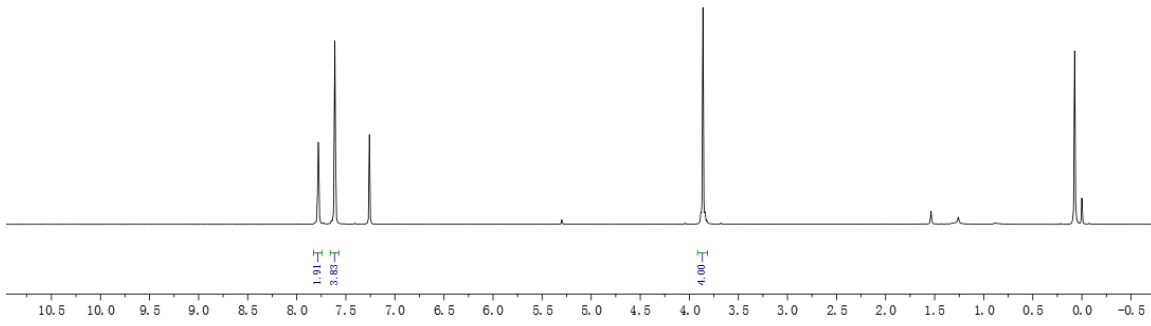

141.12  
132.19  
131.52  
131.52  
131.19  
128.93  
128.57  
128.54  
128.25  
121.52  
120.92  
120.85  
118.81

30.17

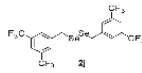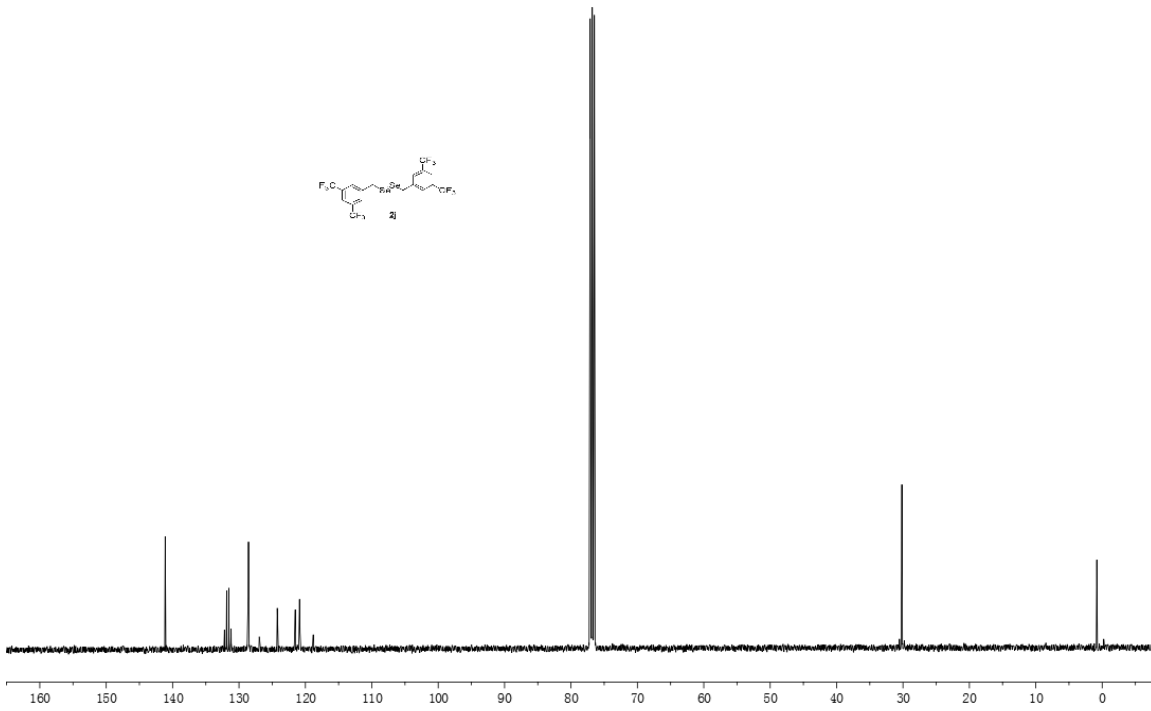

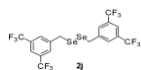

-63.030

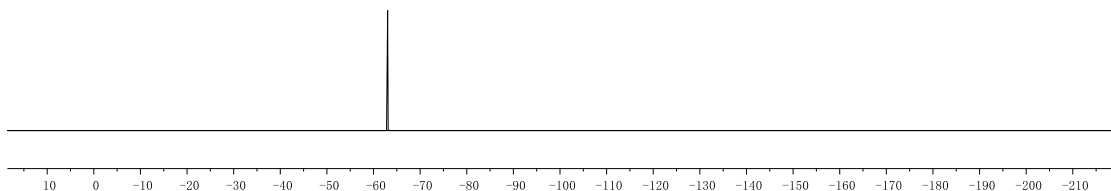

5.484  
6.385

3.831  
3.788

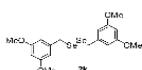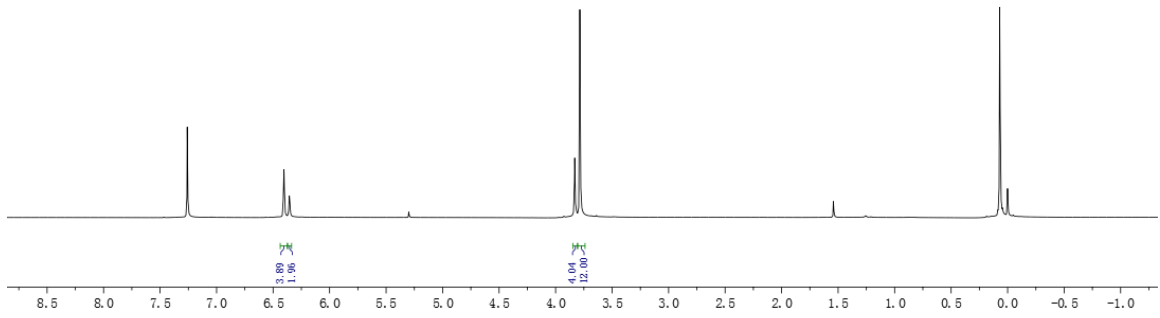

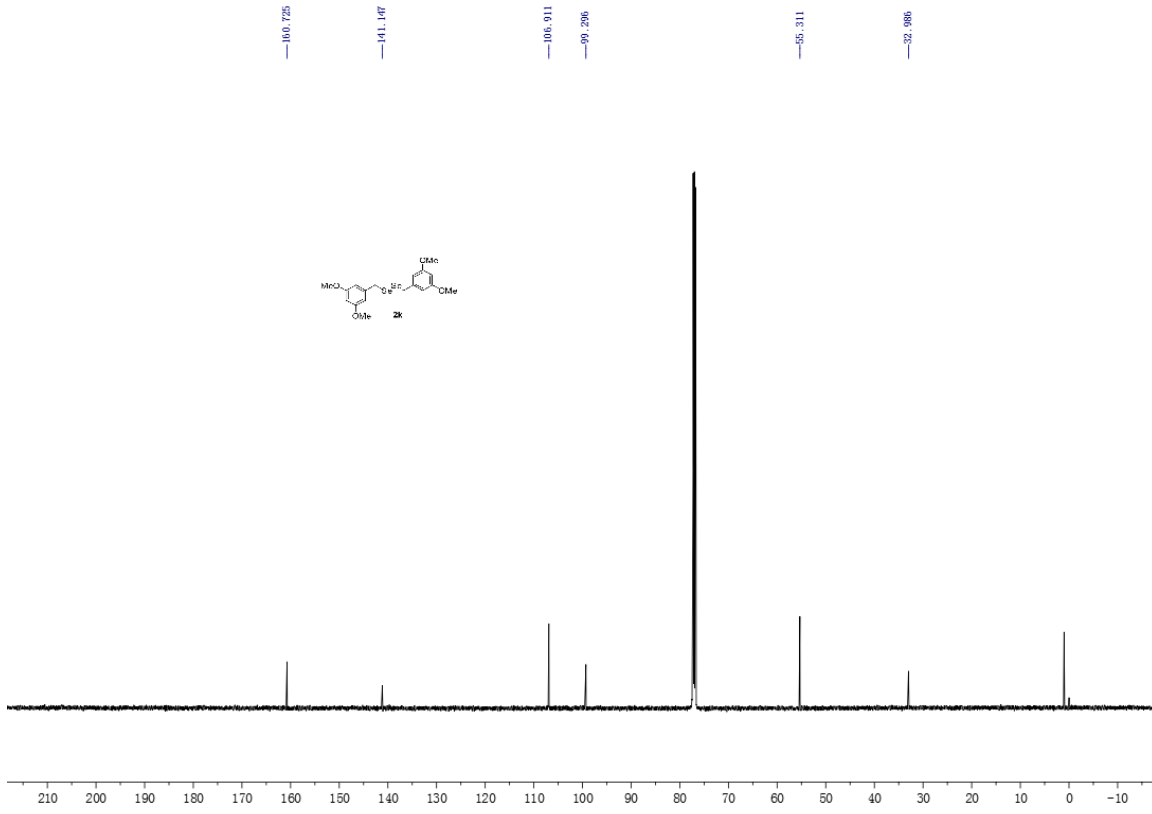

2.853  
2.917  
2.896

1.762  
1.744  
1.707  
1.688

1.405  
1.389  
1.399  
1.384  
1.392  
1.375

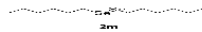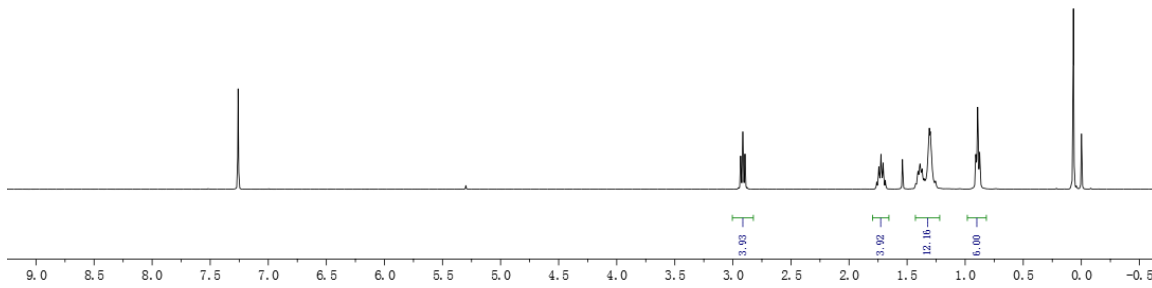

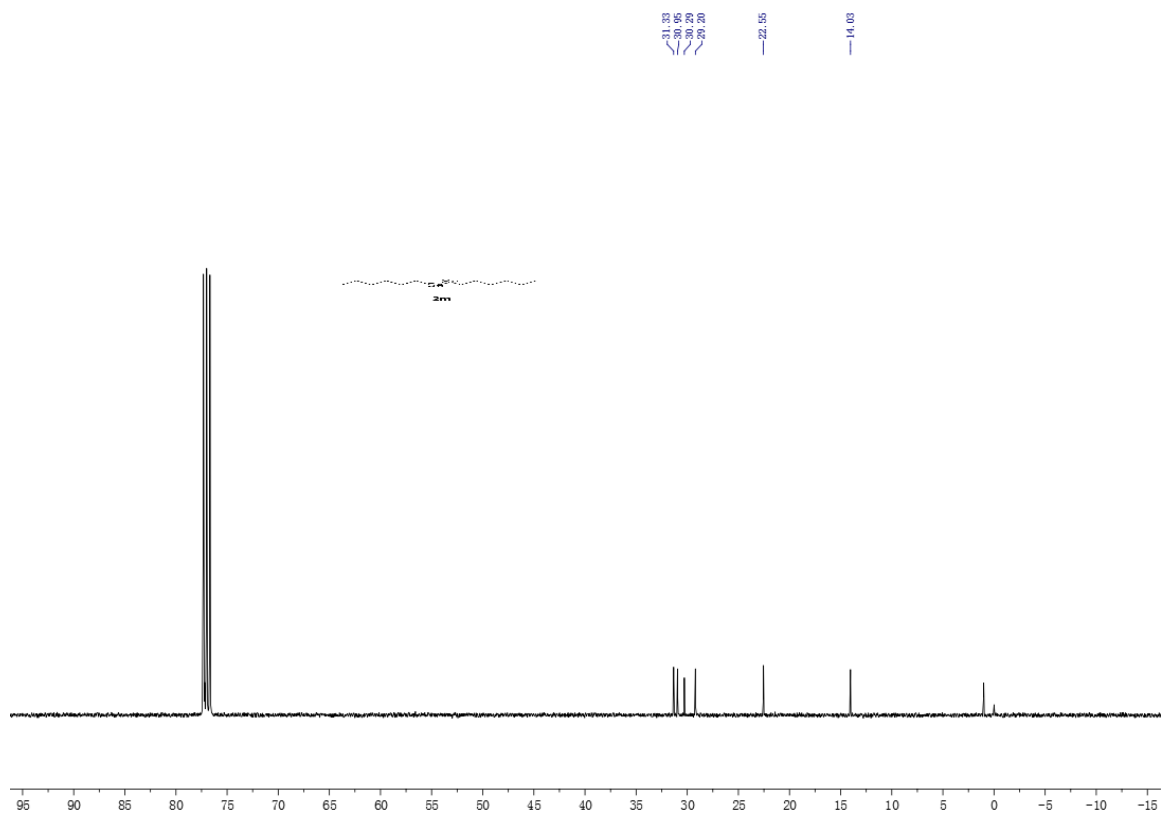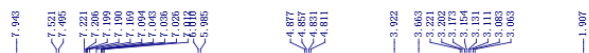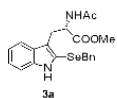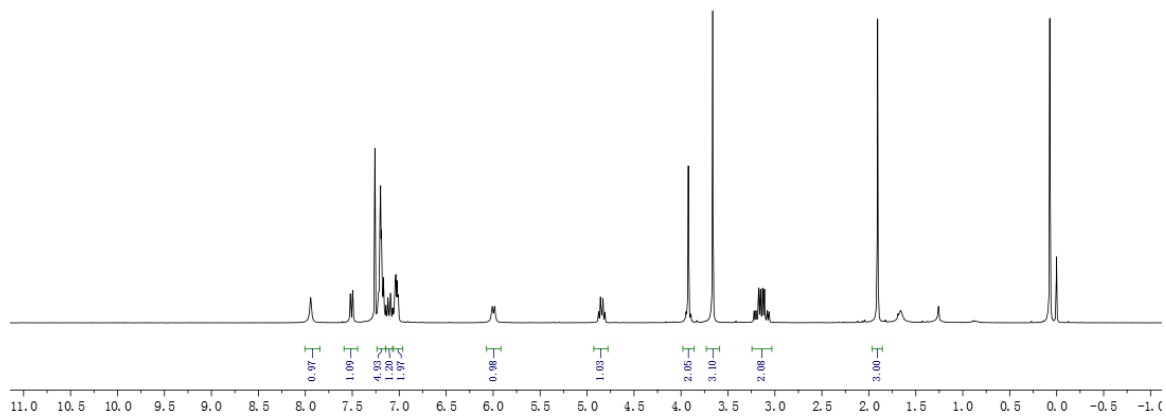

172.35  
169.65

138.64  
137.35  
128.69  
128.50  
127.11  
122.98  
119.81  
118.72  
117.10  
110.74

52.88  
52.35

33.49  
27.90  
23.19

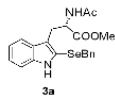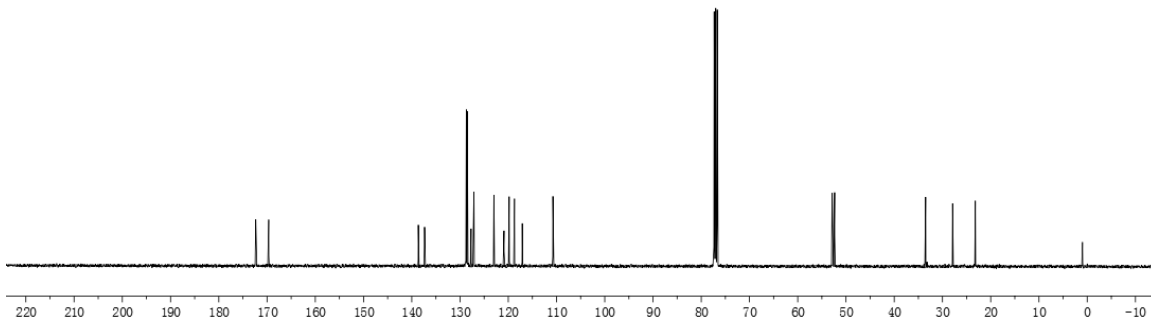

8.141

7.517  
7.491

7.234  
7.193  
7.152  
7.116  
6.997  
6.891  
6.873  
6.855  
6.835  
6.817

4.857  
4.840  
4.832  
4.817

3.925

3.666

3.379  
3.373  
3.153  
3.138  
3.065  
3.043  
3.030

1.905

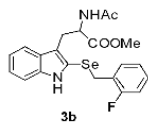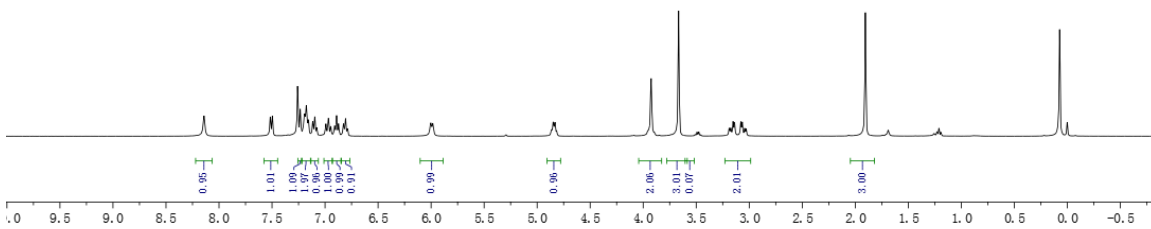

172.39  
 169.65  
 161.08  
 159.22  
 137.39  
 136.60  
 135.25  
 129.06  
 128.98  
 127.71  
 125.93  
 123.97  
 123.52  
 120.58  
 119.87  
 117.98  
 115.53  
 115.27  
 113.77  
 52.82  
 52.36  
 27.83  
 26.03  
 23.18

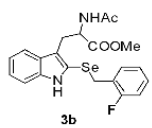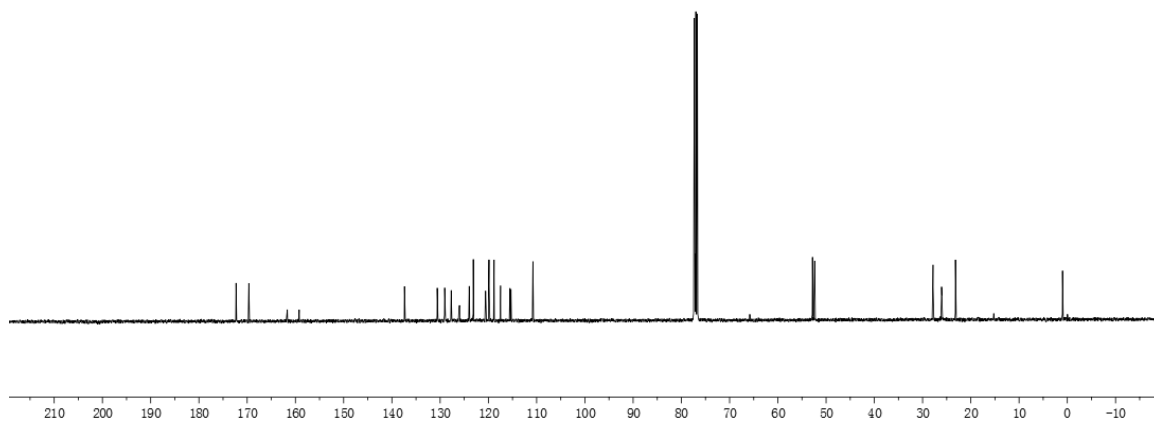

117.254

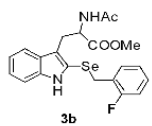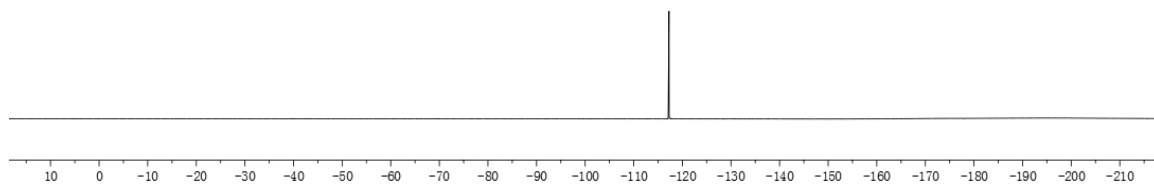

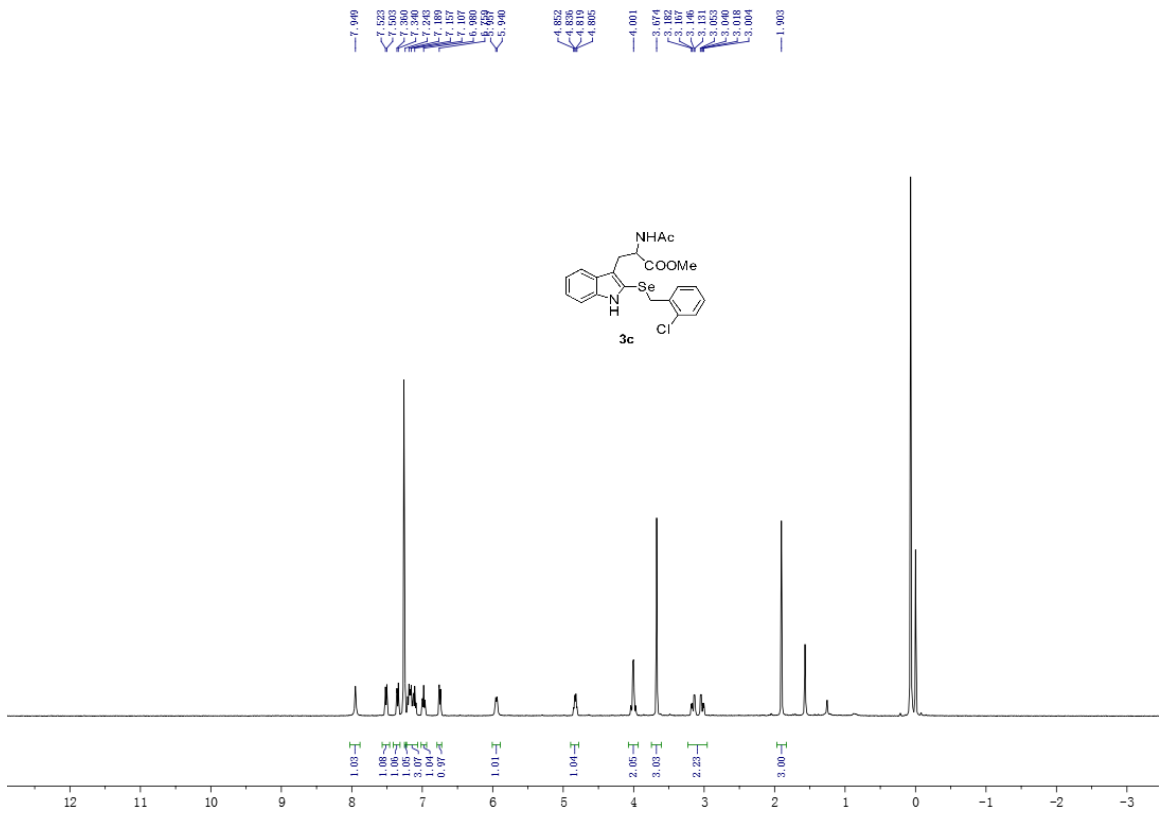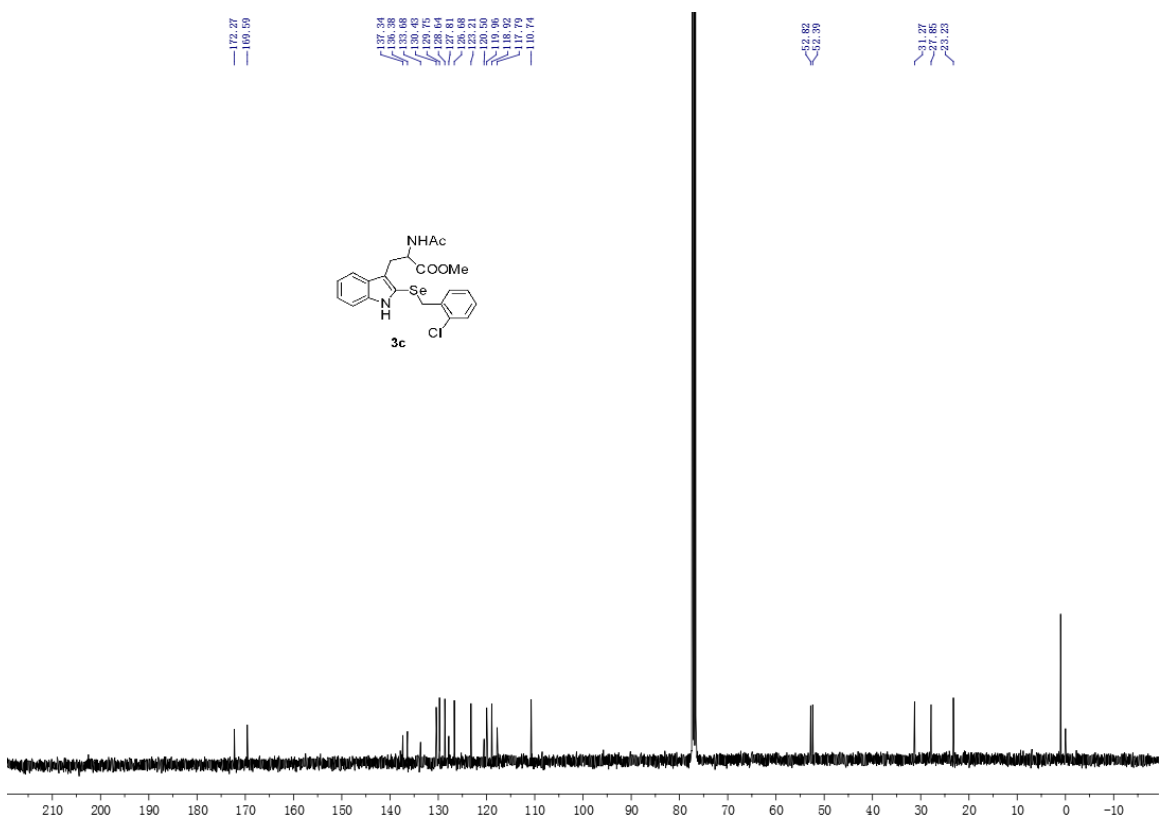

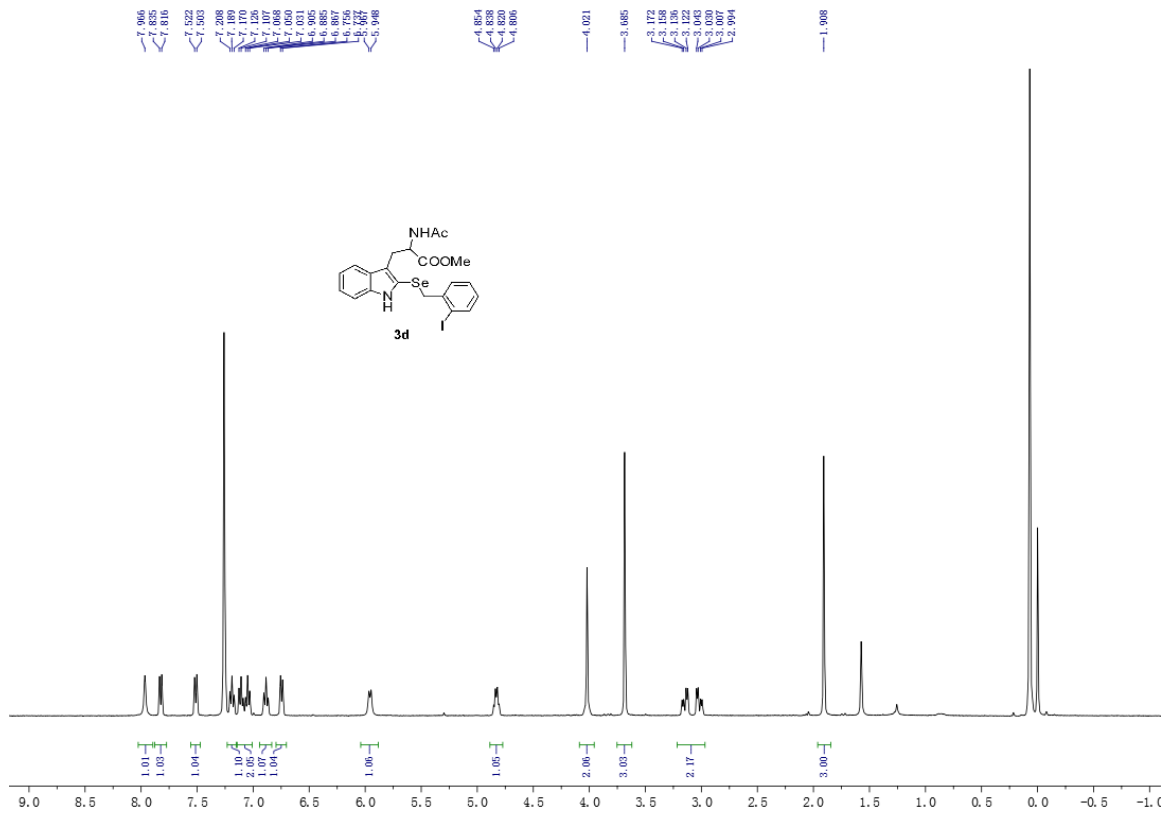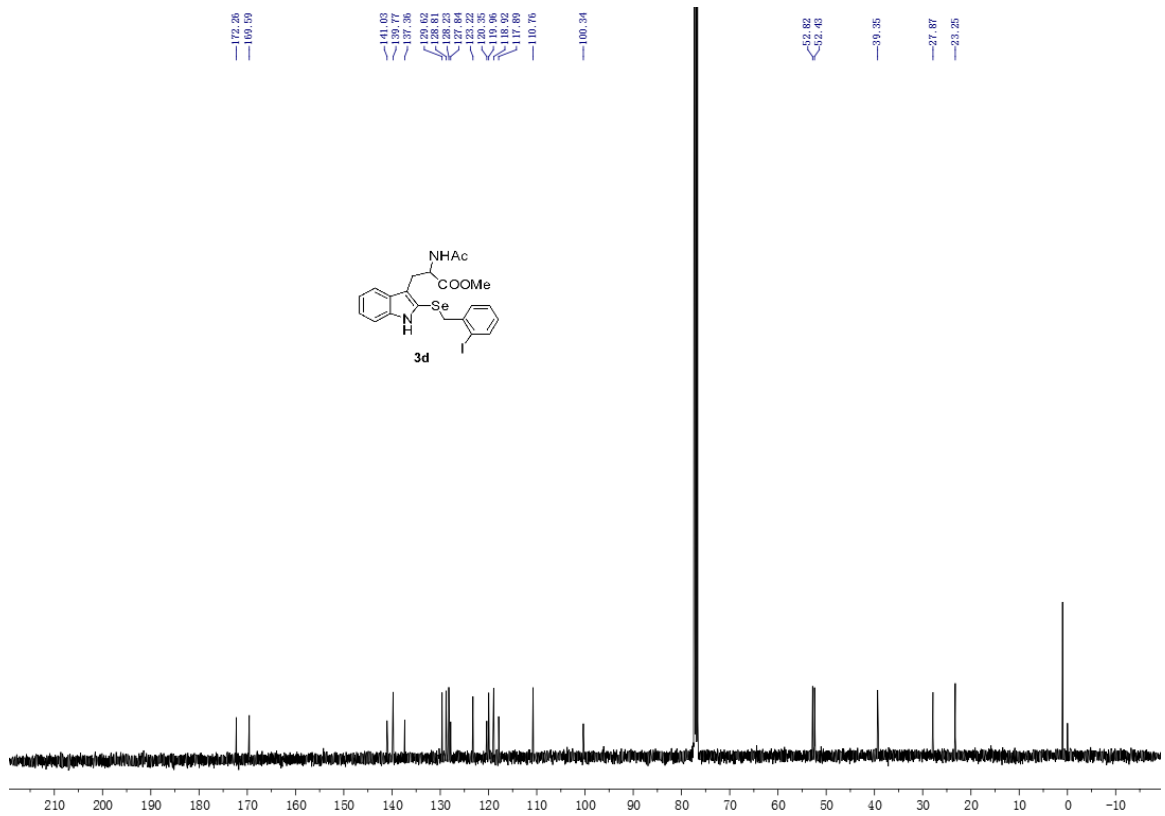



7.873  
 7.520  
 7.501  
 7.215  
 7.196  
 7.182  
 7.122  
 6.780  
 6.658  
 6.466  
 5.978  
 5.961  
 4.885  
 4.859  
 4.838  
 3.889  
 3.668  
 3.541  
 3.541  
 3.227  
 3.227  
 3.191  
 3.157  
 3.153  
 3.107  
 1.912

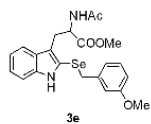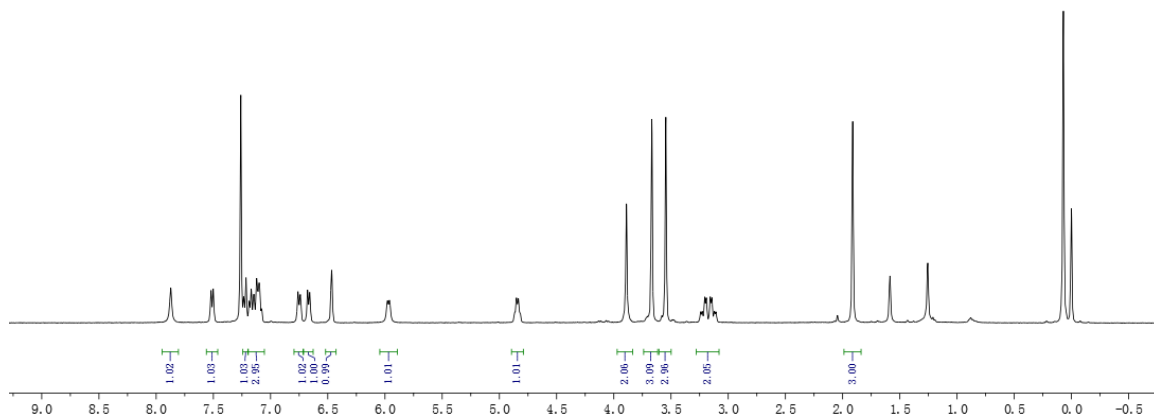

175.32  
 169.62  
 159.54  
 140.15  
 137.33  
 129.54  
 127.04  
 126.97  
 126.86  
 118.73  
 117.24  
 115.26  
 110.71  
 54.95  
 52.89  
 52.37  
 33.44  
 27.92  
 23.21

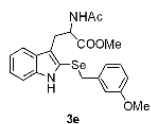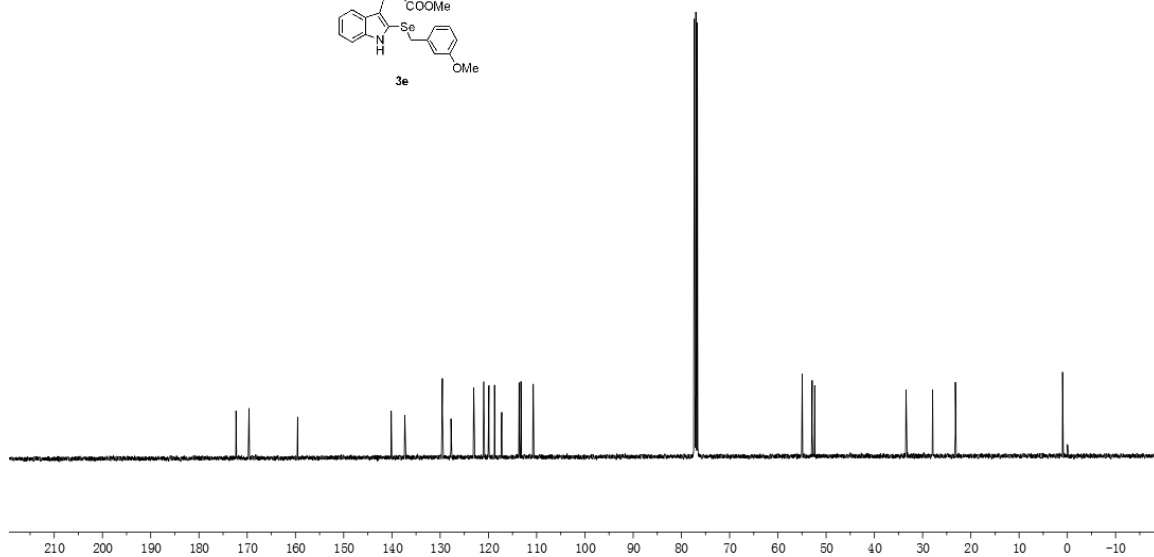

8.035, 8.032, 7.925, 7.901, 7.881, 7.737, 7.727, 7.287, 7.229, 7.125, 7.105, 7.105, 7.128, 7.122, 7.022, 5.902, 5.943, 4.856, 4.833, 4.818, 3.988, 3.653, 3.102, 3.127, 3.117, 3.066, 3.031, 3.016, 1.909

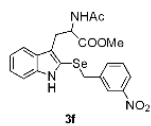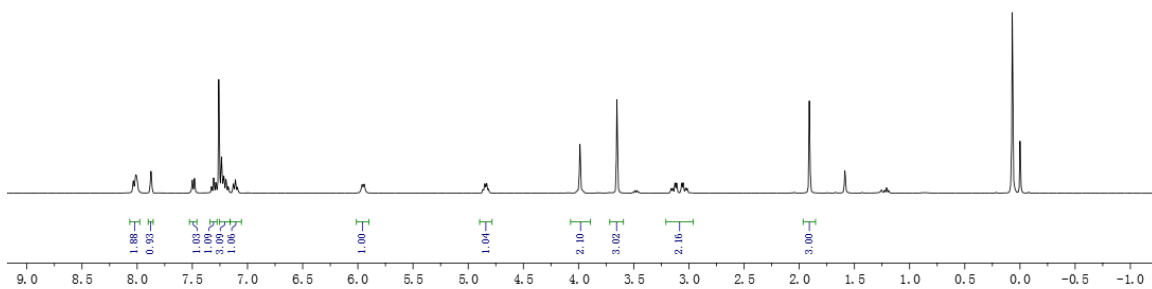

172.23, 169.57, 146.14, 140.78, 137.40, 134.56, 132.70, 127.70, 123.56, 121.86, 120.21, 118.51, 116.29, 116.21, 110.81, 52.84, 52.44, 32.14, 28.08, 23.22

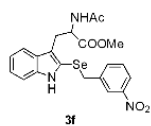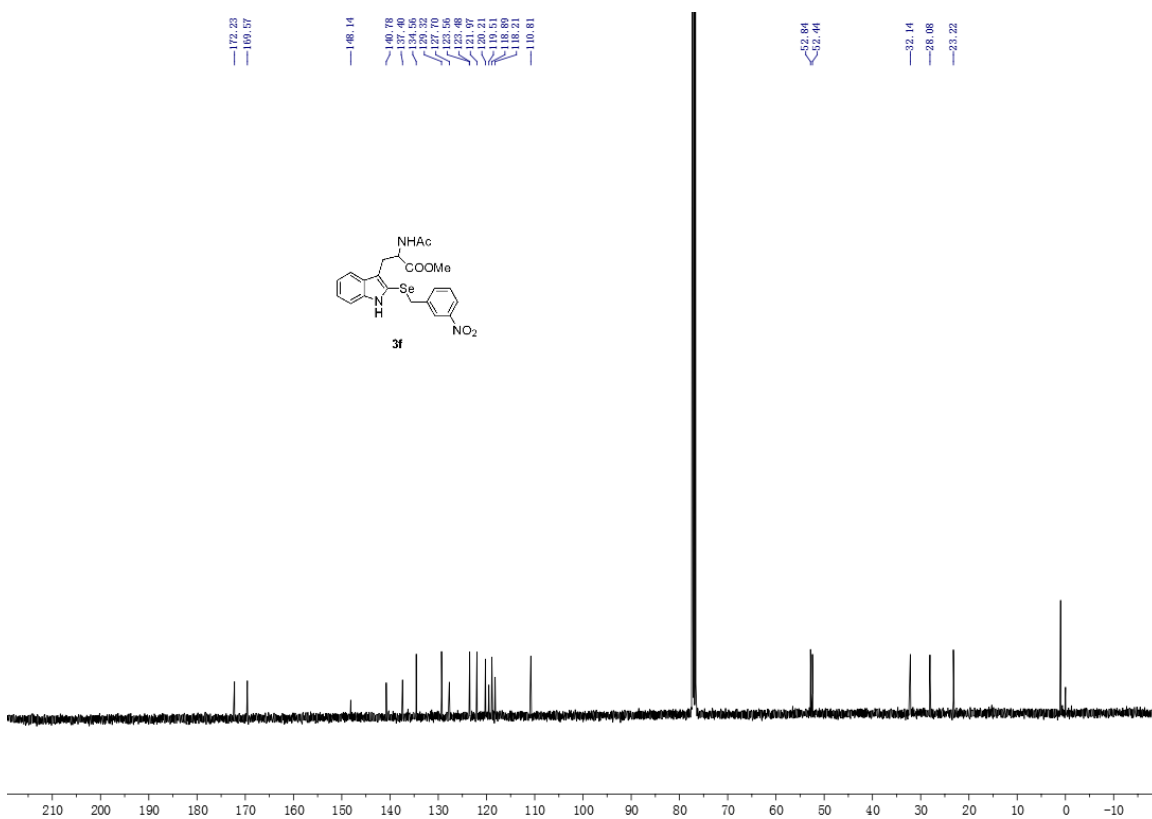

7.837  
 7.525  
 7.506  
 7.239  
 7.220  
 7.100  
 7.100  
 7.173  
 7.153  
 7.100  
 7.100  
 7.082  
 7.065  
 7.007  
 6.953  
 6.934  
 5.981  
 5.963  
 4.871  
 4.859  
 4.823  
 3.908  
 3.609  
 3.253  
 3.239  
 3.217  
 3.169  
 3.155  
 3.113  
 3.119  
 2.316  
 1.911

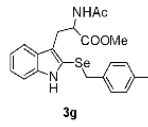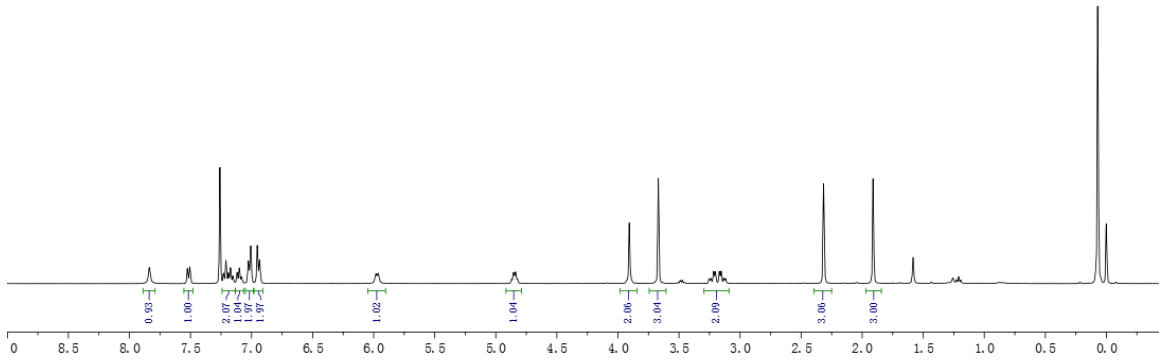

175.34  
 169.60  
 137.30  
 137.06  
 135.58  
 129.24  
 127.52  
 127.72  
 127.98  
 121.19  
 118.77  
 117.01  
 110.67  
 52.87  
 52.37  
 33.40  
 27.98  
 23.23  
 21.11

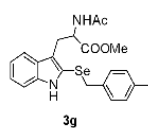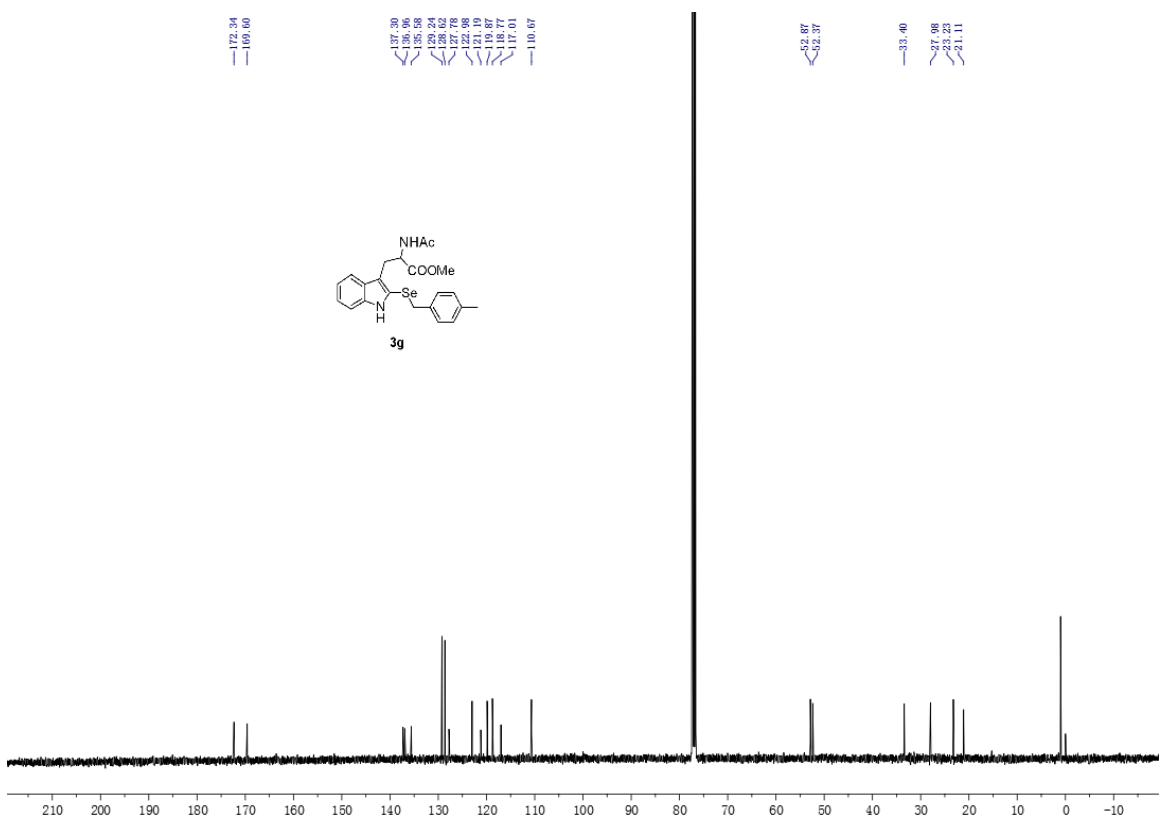

7.931  
7.530  
7.511  
7.513  
7.294  
7.241  
7.182  
6.882  
5.973  
5.954  
4.889  
4.847  
4.832  
3.859  
3.861  
3.710  
3.195  
3.175  
3.155  
3.122  
3.108  
3.089  
3.072  
1.910

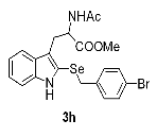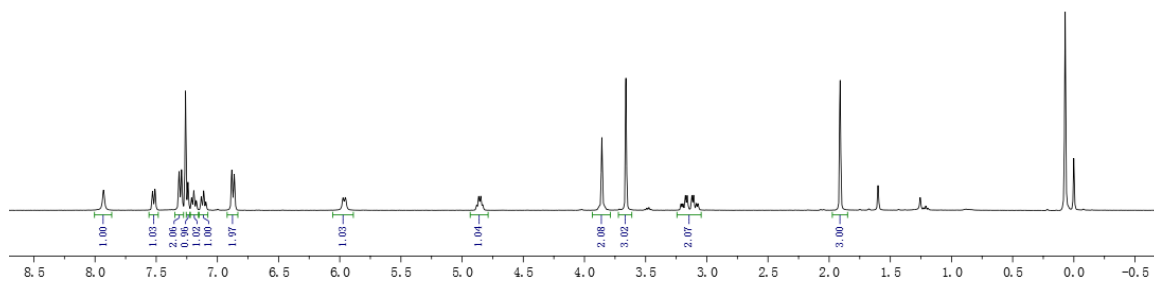

175.30  
169.35  
137.83  
131.99  
130.31  
127.72  
123.25  
121.01  
120.41  
119.65  
117.55  
100.78  
52.84  
52.40  
32.74  
28.02  
23.23

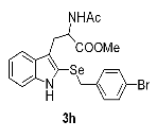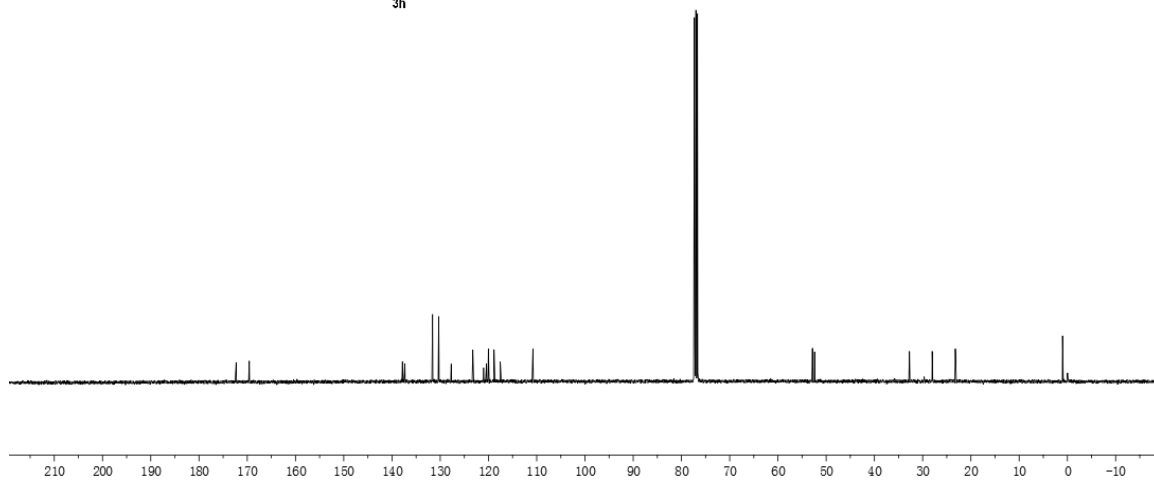

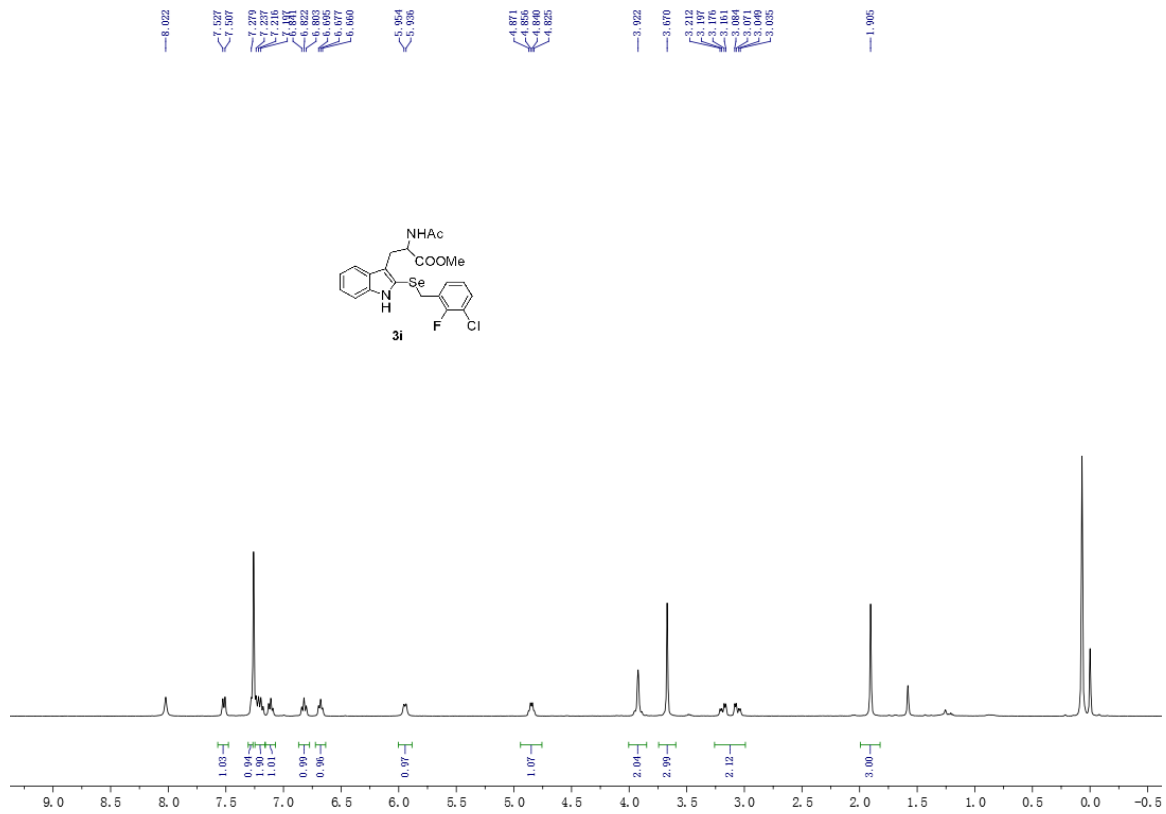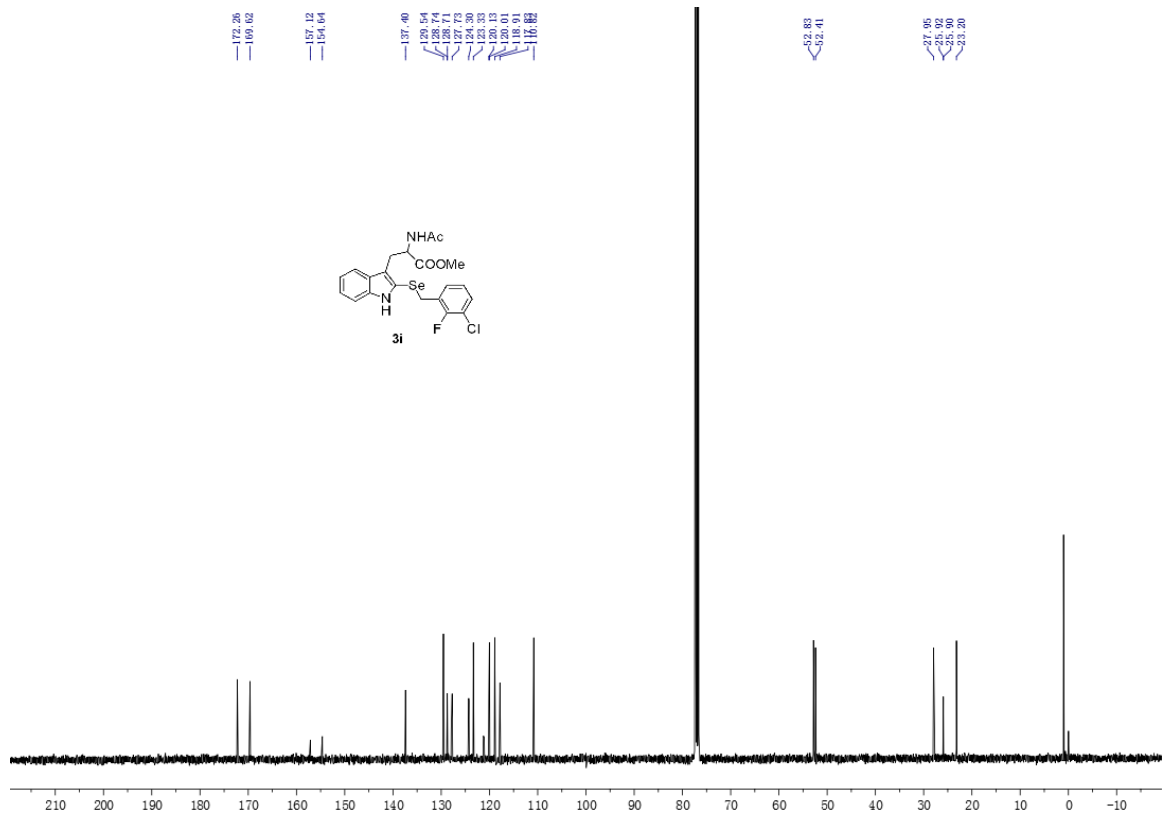

119.021

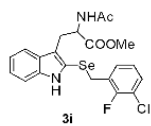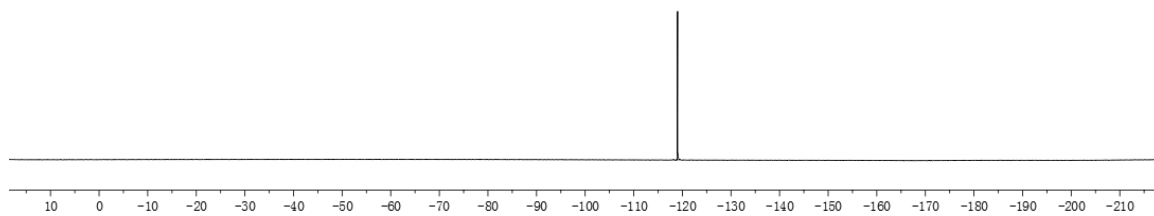

8.049  
7.665  
7.483  
7.473  
7.237  
7.216  
7.192  
7.130  
7.111  
7.094  
5.955  
5.926  
4.875  
4.860  
4.843  
4.828  
3.977  
3.645  
3.114  
3.099  
3.083  
2.998  
2.983  
2.949  
1.891

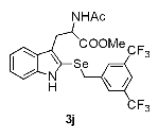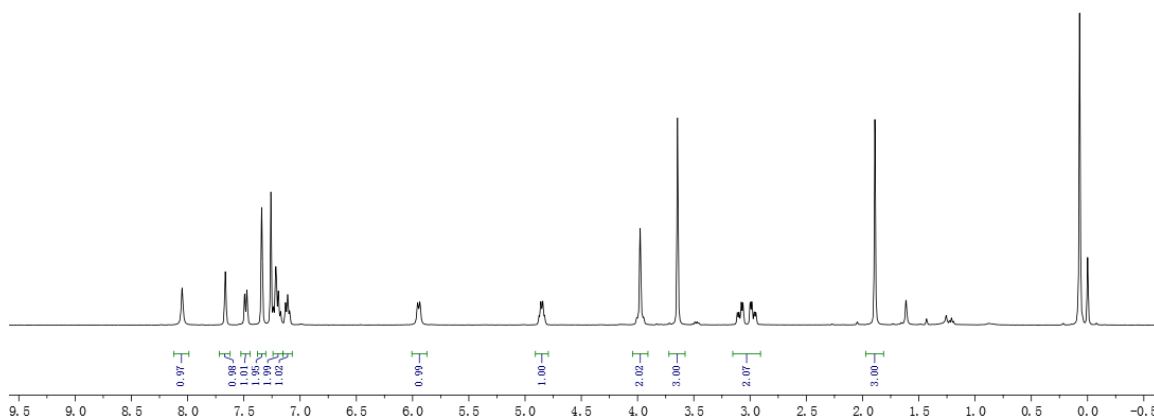

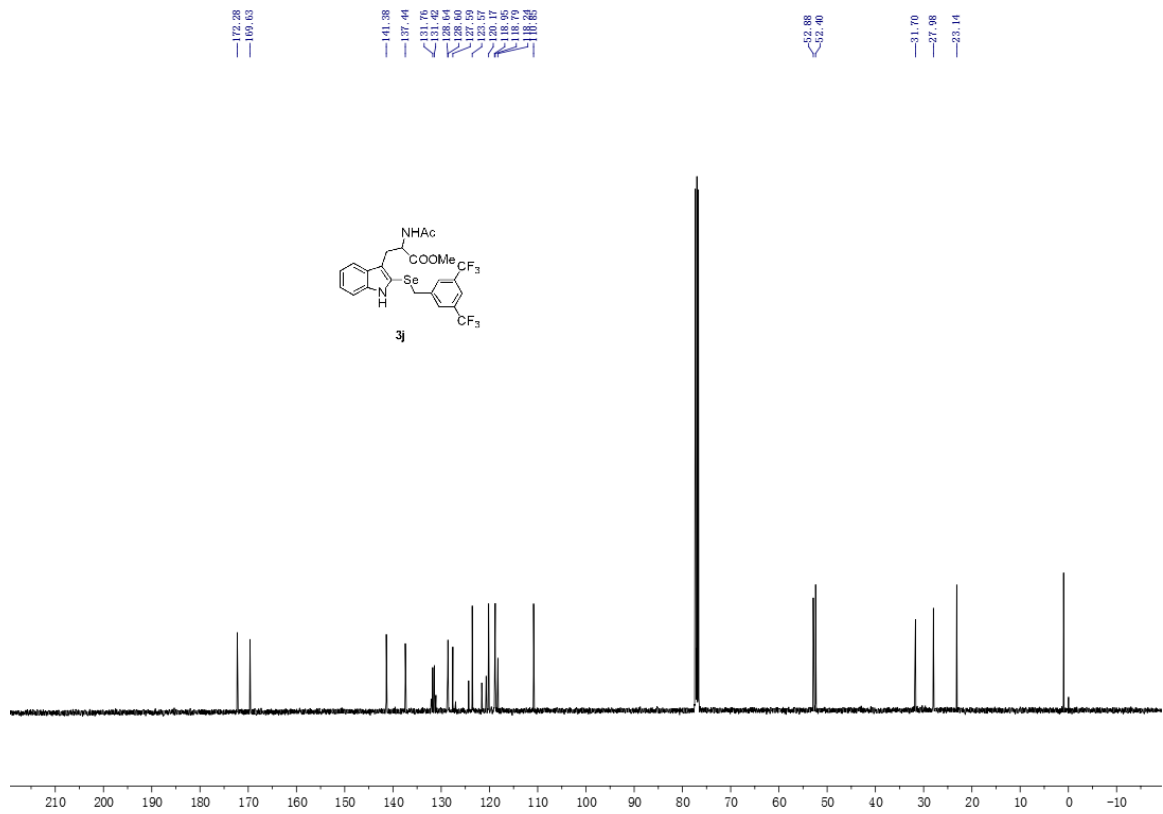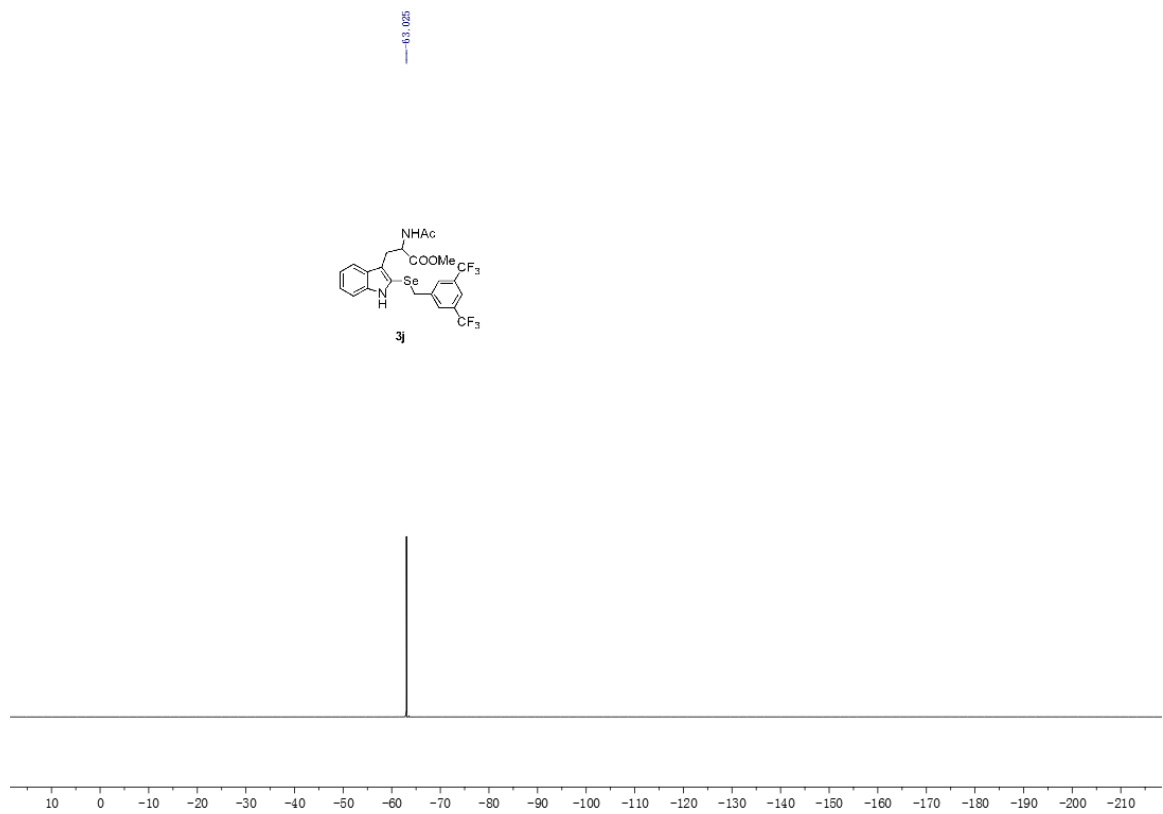

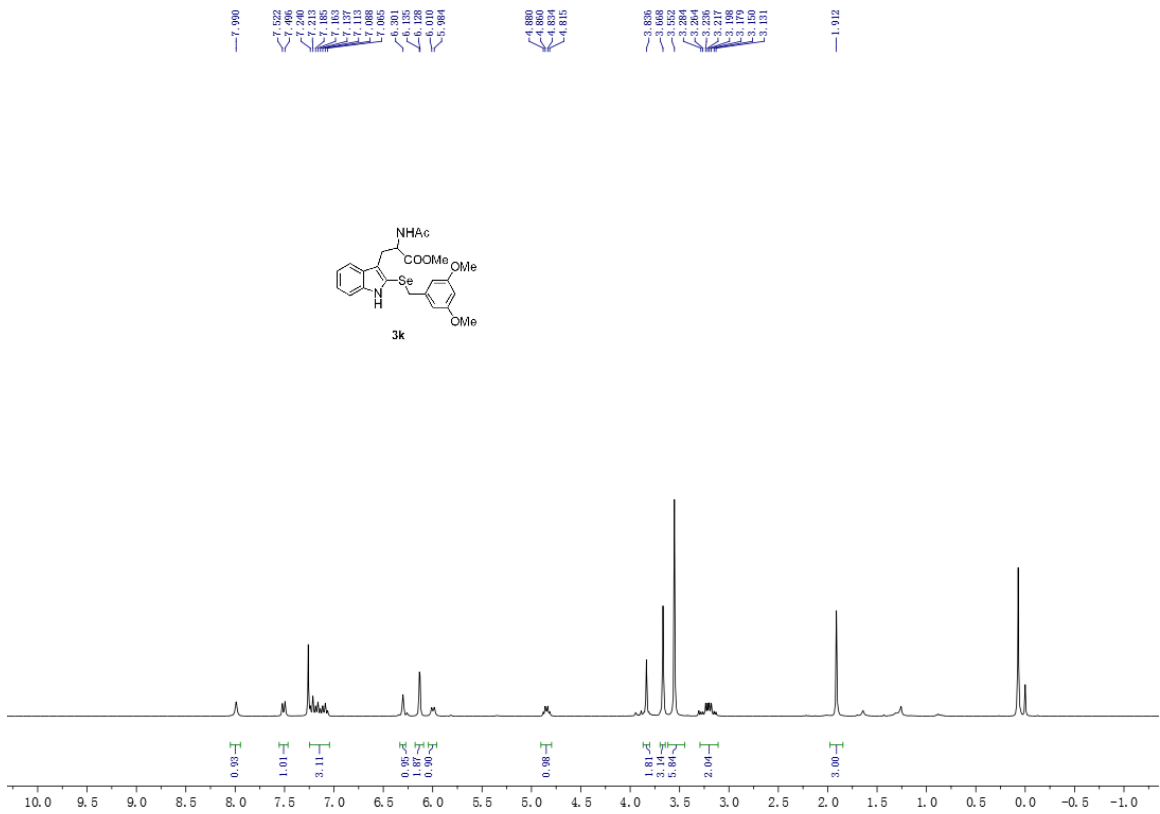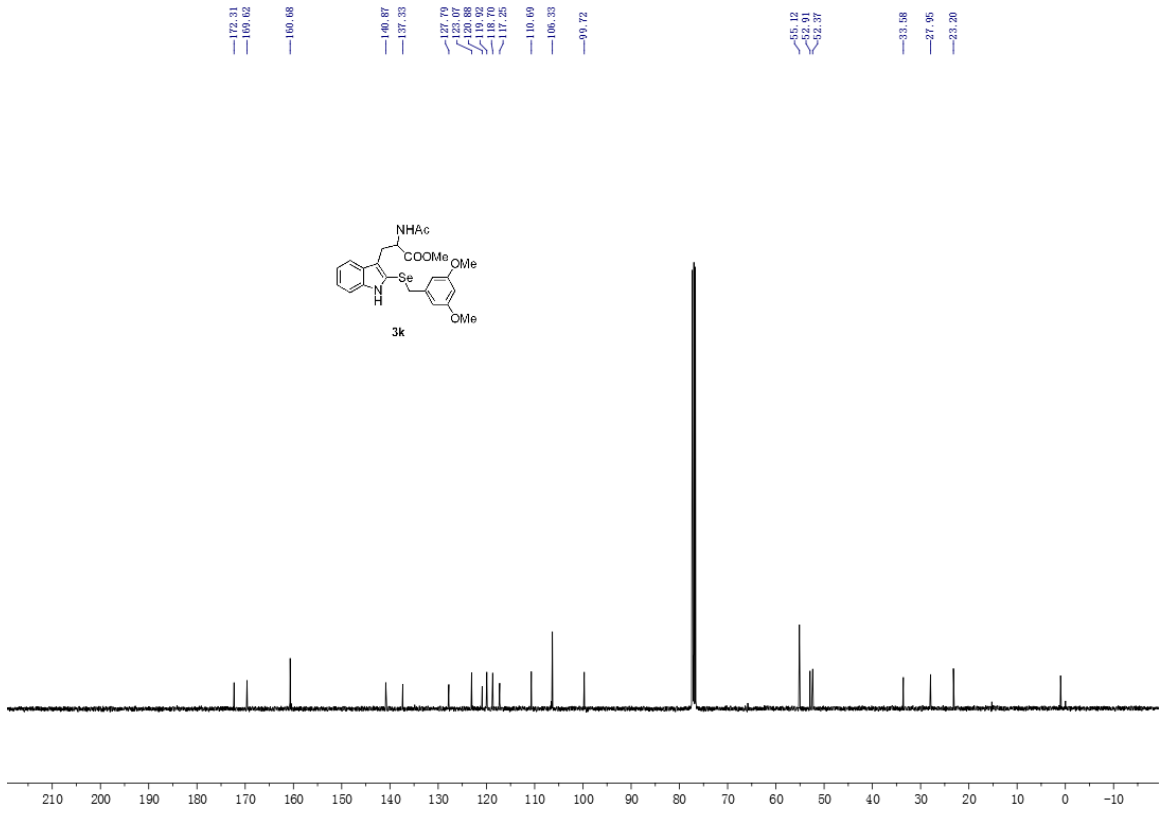



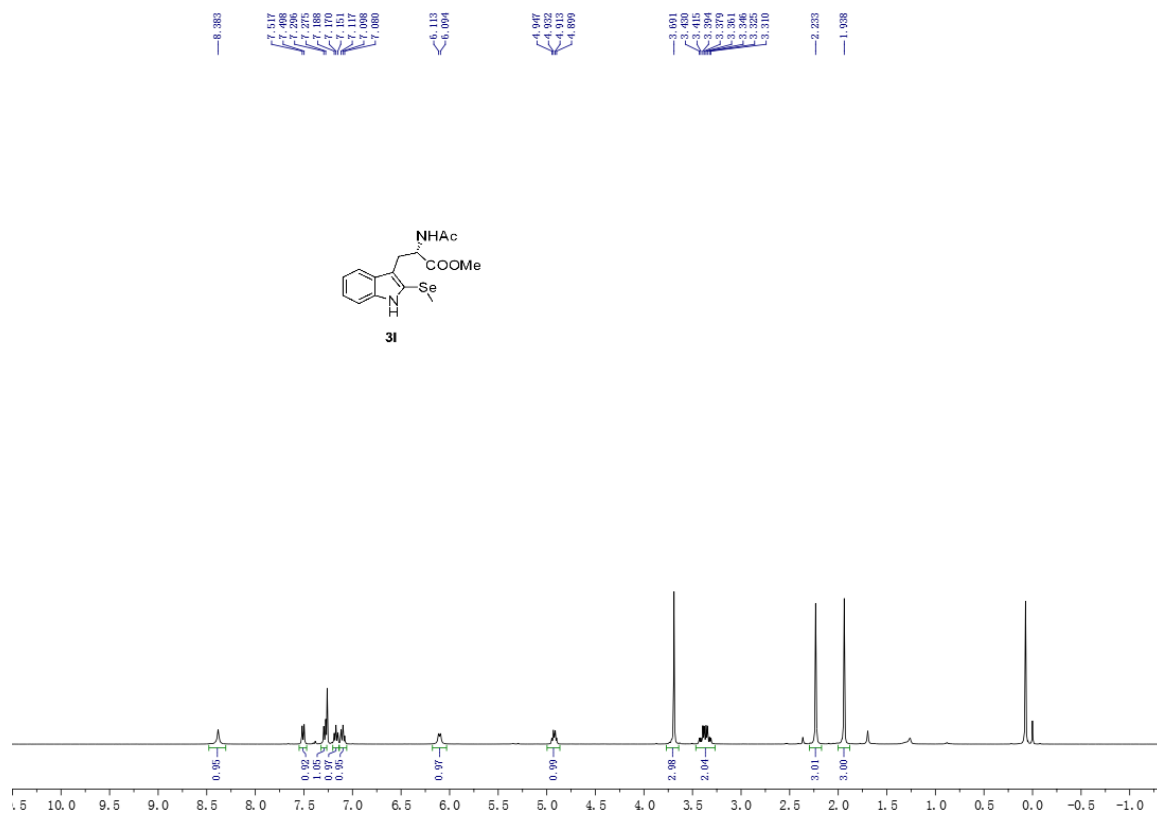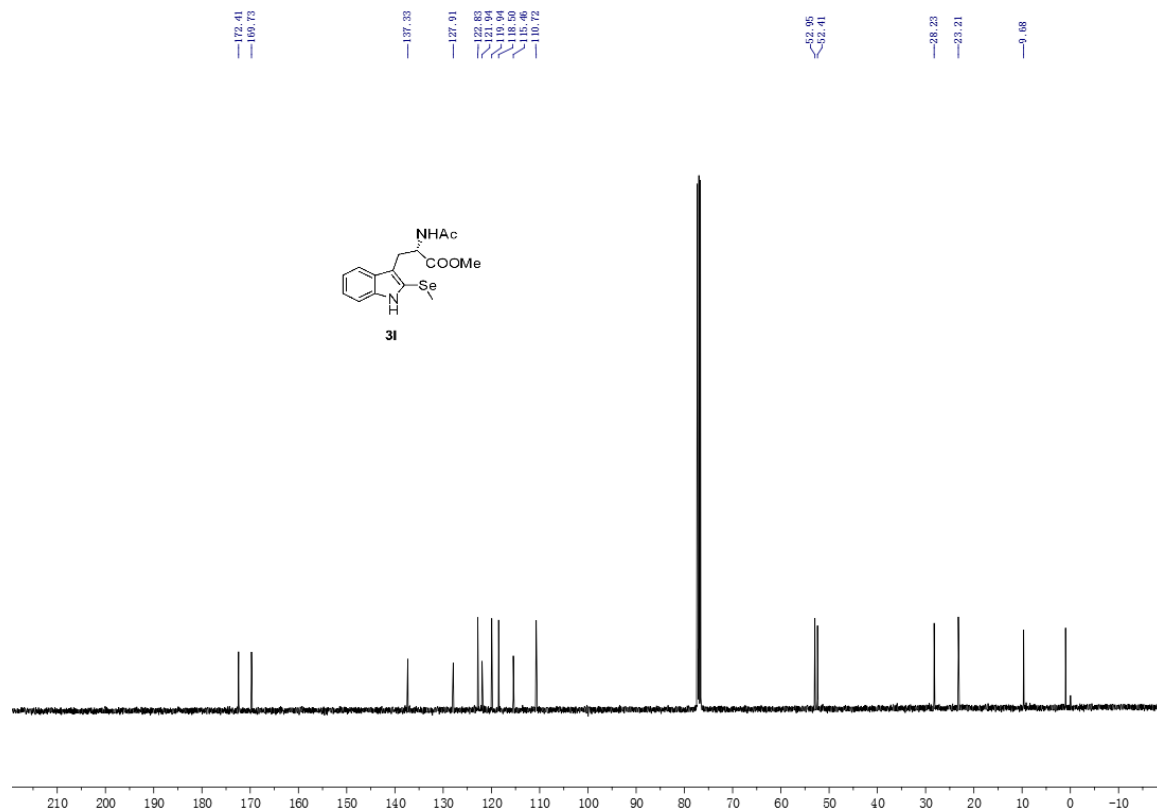

-8.397  
 7.533  
 7.514  
 7.477  
 7.477  
 7.188  
 7.170  
 7.152  
 7.118  
 7.099  
 7.082  
 -6.123  
 -6.105  
 -4.927  
 -4.914  
 -4.885  
 -4.881  
 -3.089  
 -3.414  
 -3.392  
 -3.372  
 -3.361  
 -3.346  
 -2.766  
 -2.747  
 -2.729  
 -1.943  
 -1.933  
 -1.915  
 -1.899  
 -1.884  
 -1.817  
 -1.235  
 -0.847  
 -0.832  
 -0.822

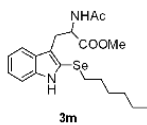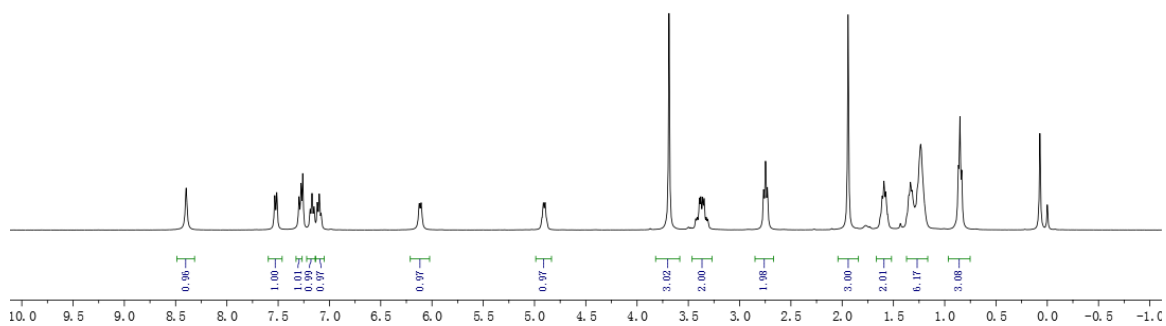

-172.40  
 -169.72  
 -137.30  
 -127.84  
 -122.77  
 -121.25  
 -118.55  
 -116.57  
 -116.27  
 -110.72  
 -52.95  
 -52.40  
 -31.19  
 -31.17  
 -30.00  
 -29.29  
 -28.91  
 -23.21  
 -22.47  
 -13.96

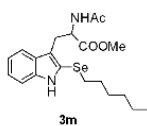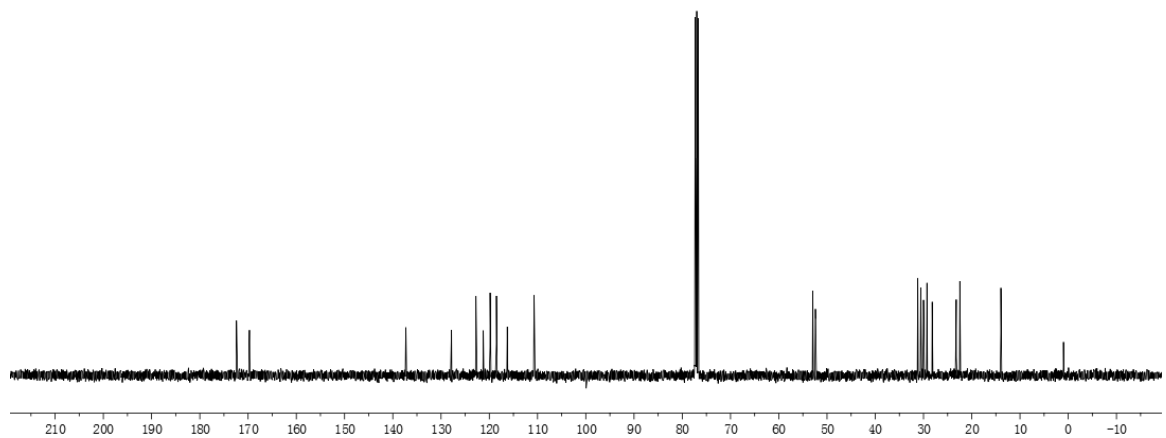

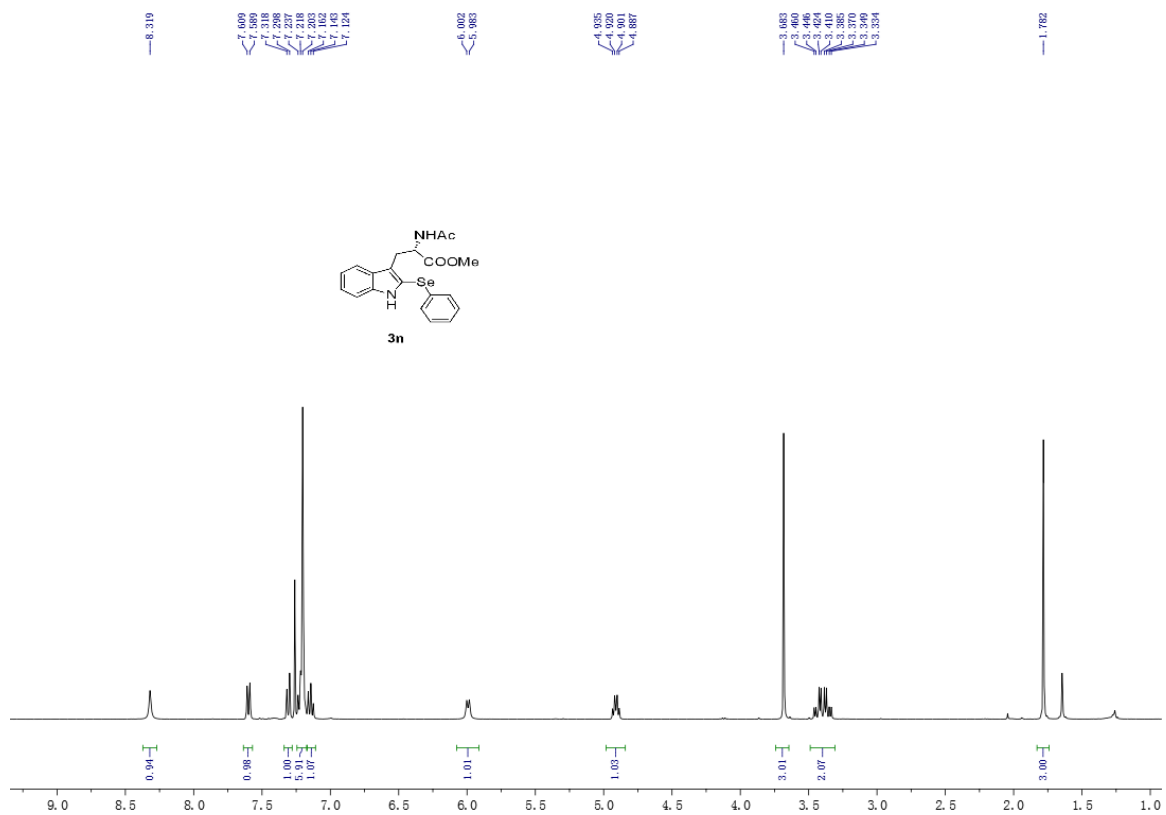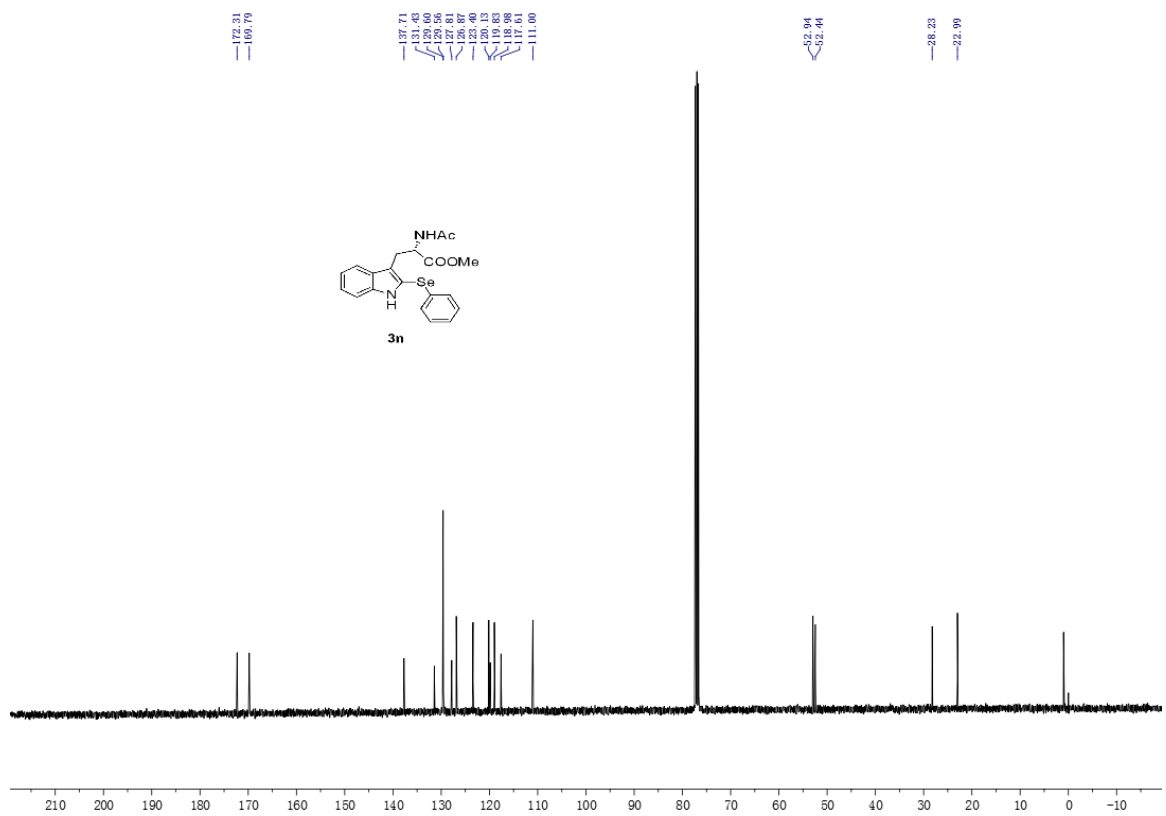

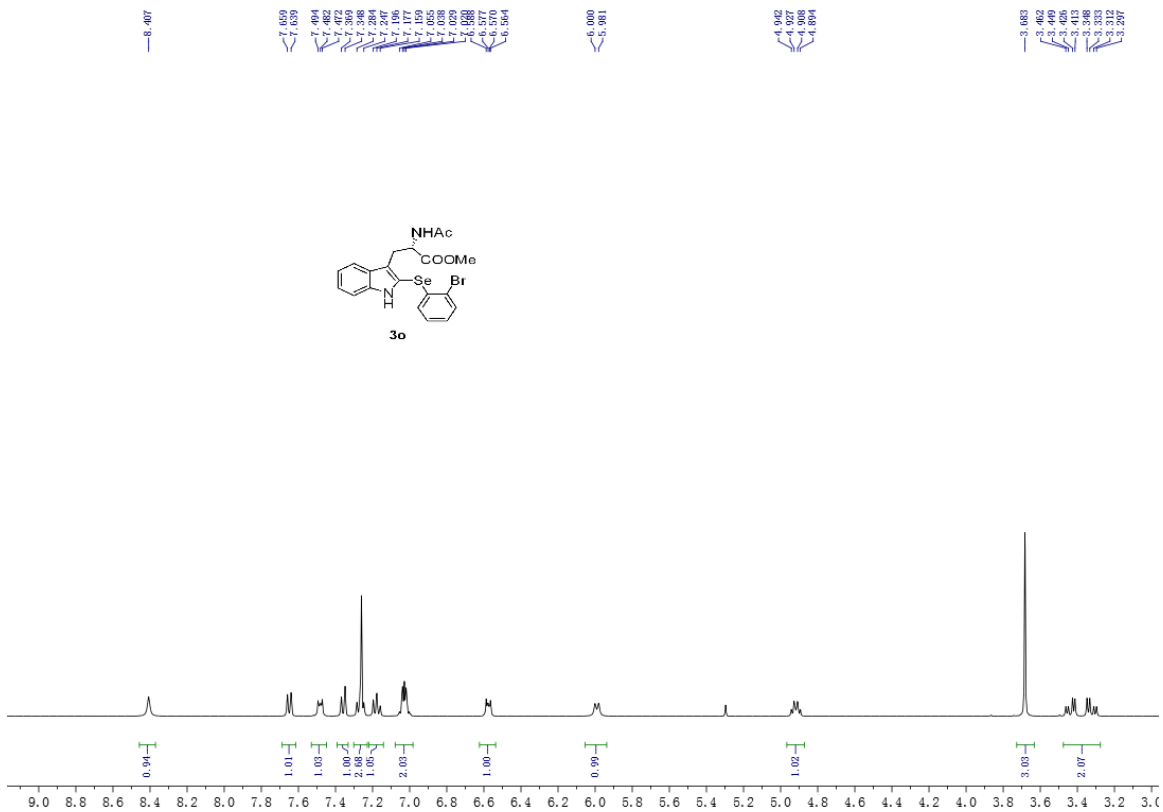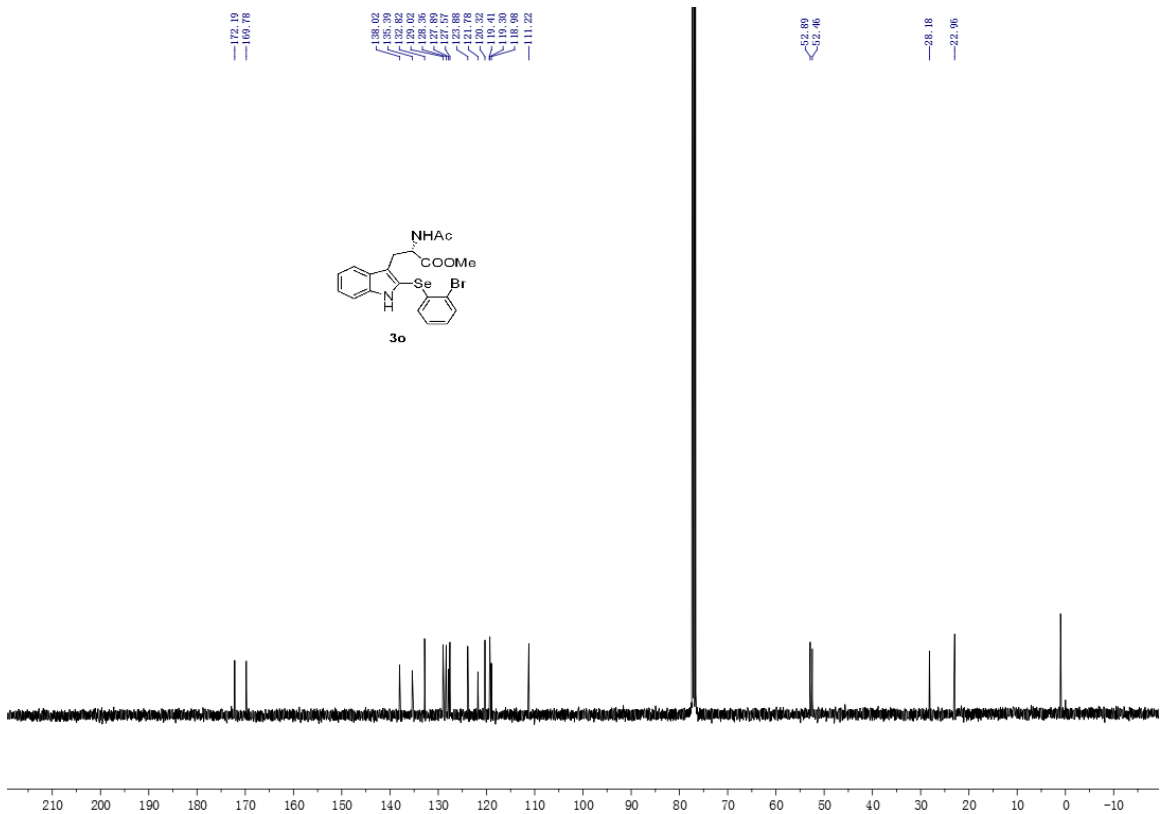

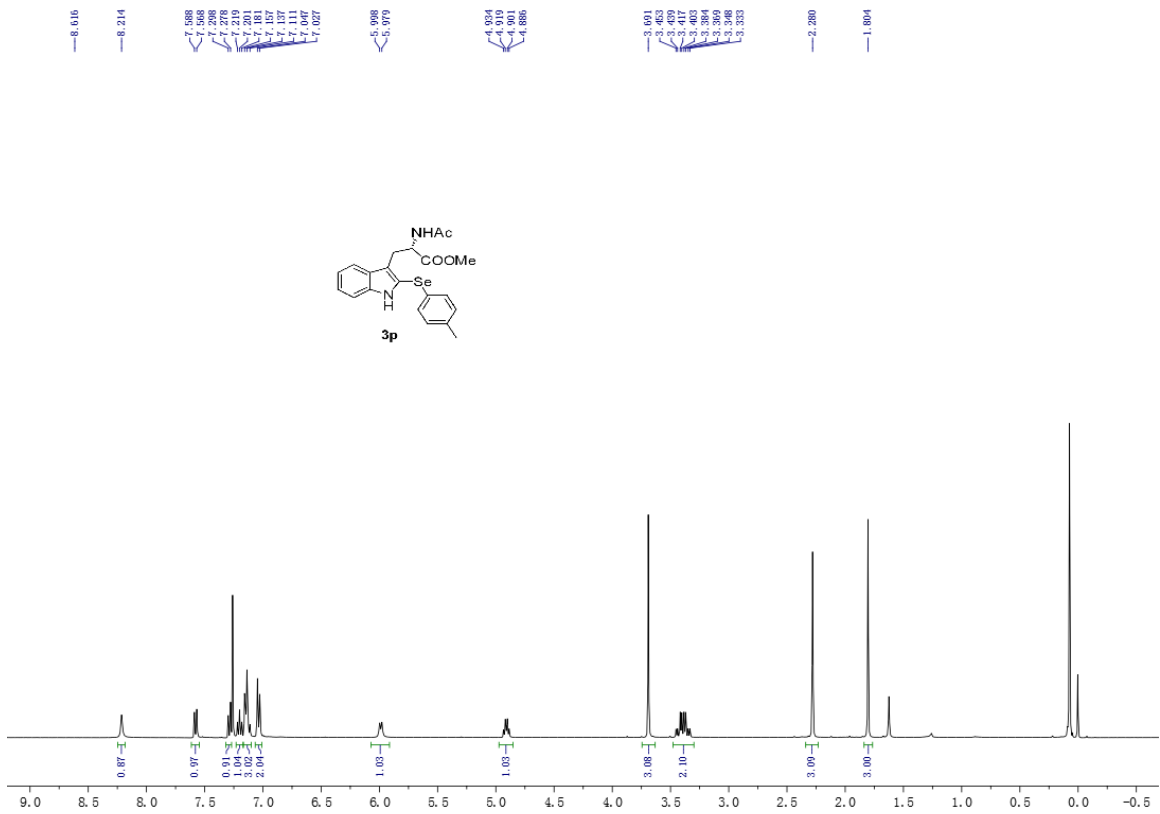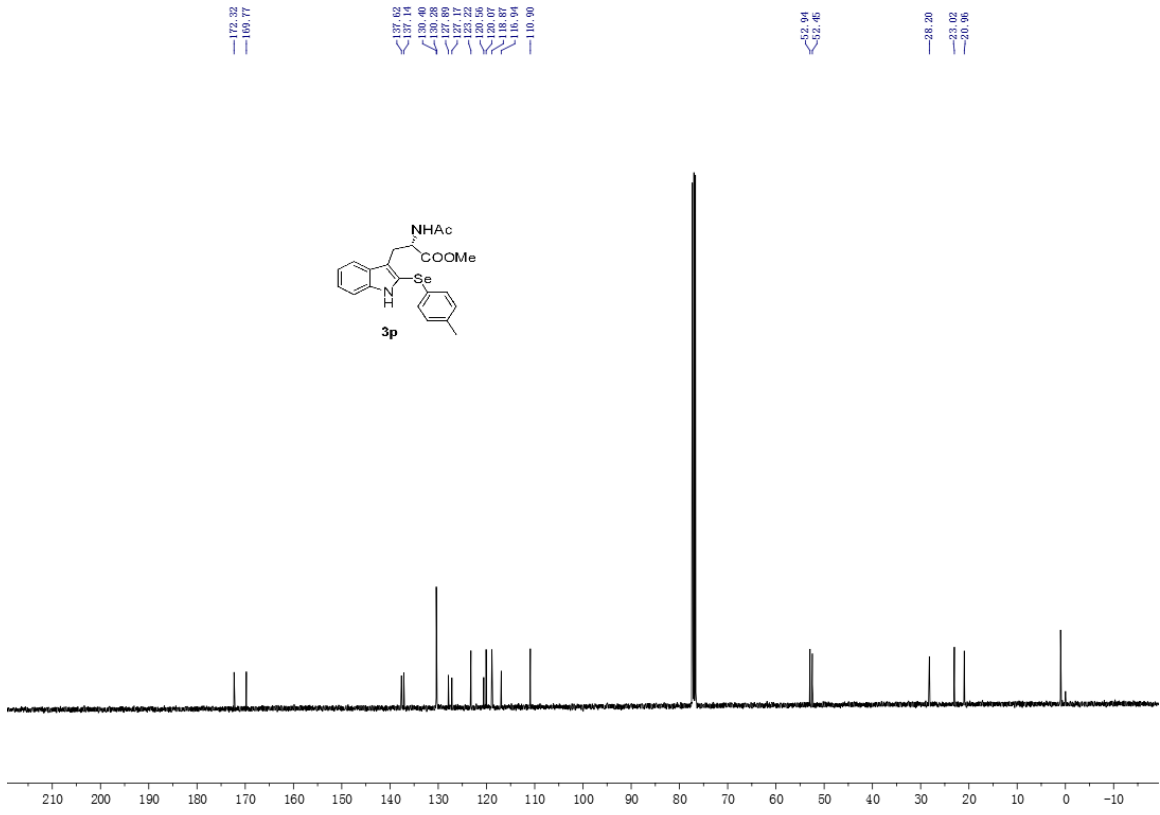

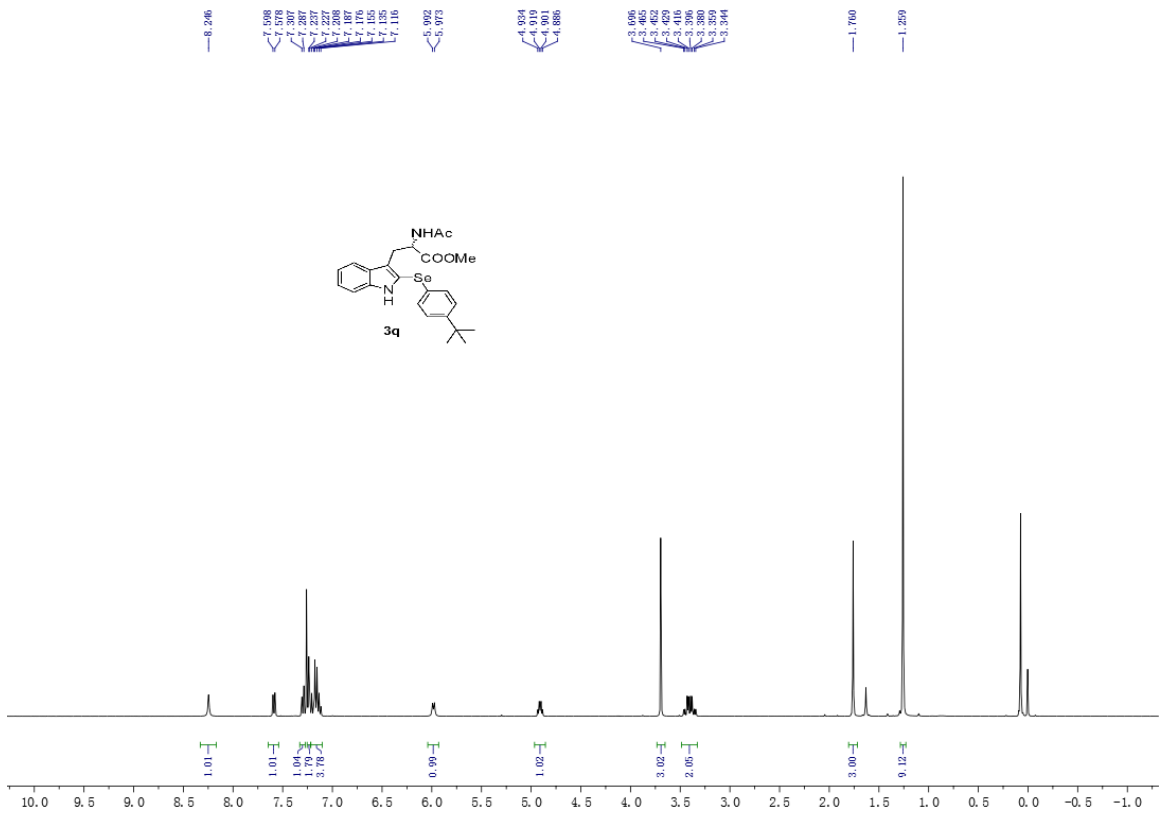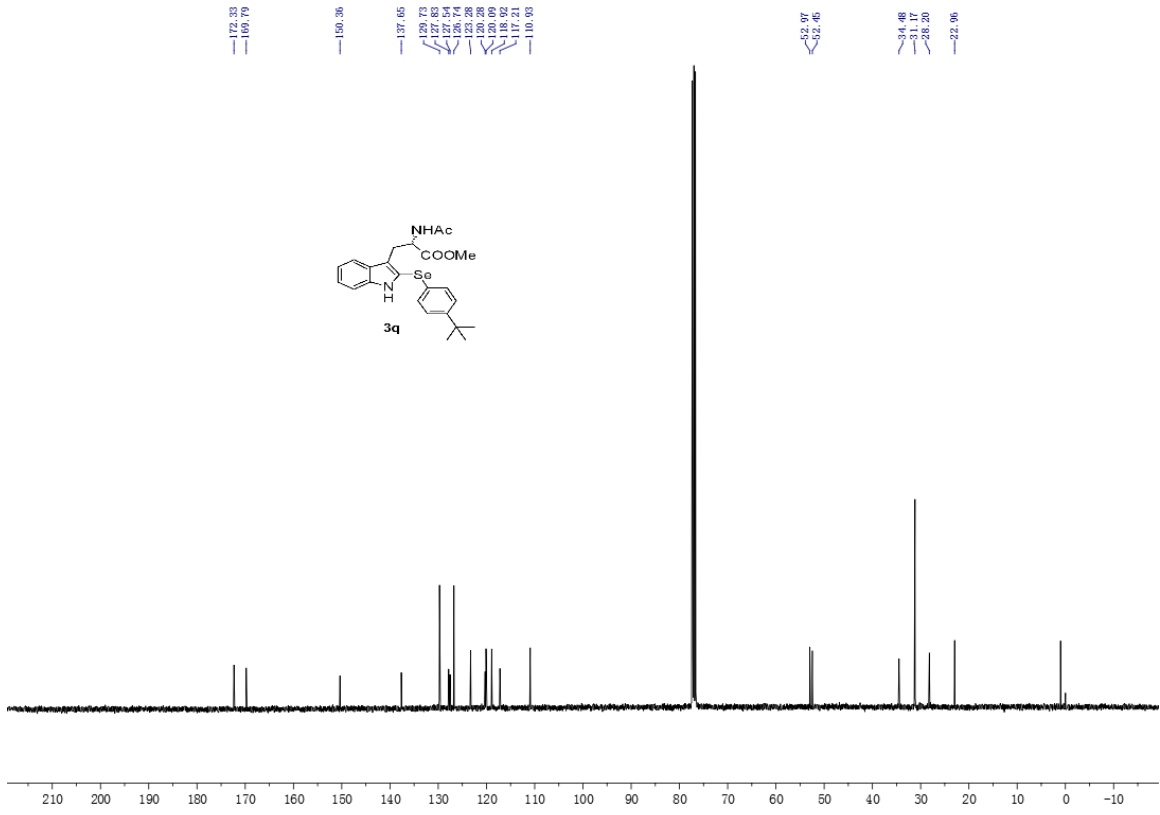

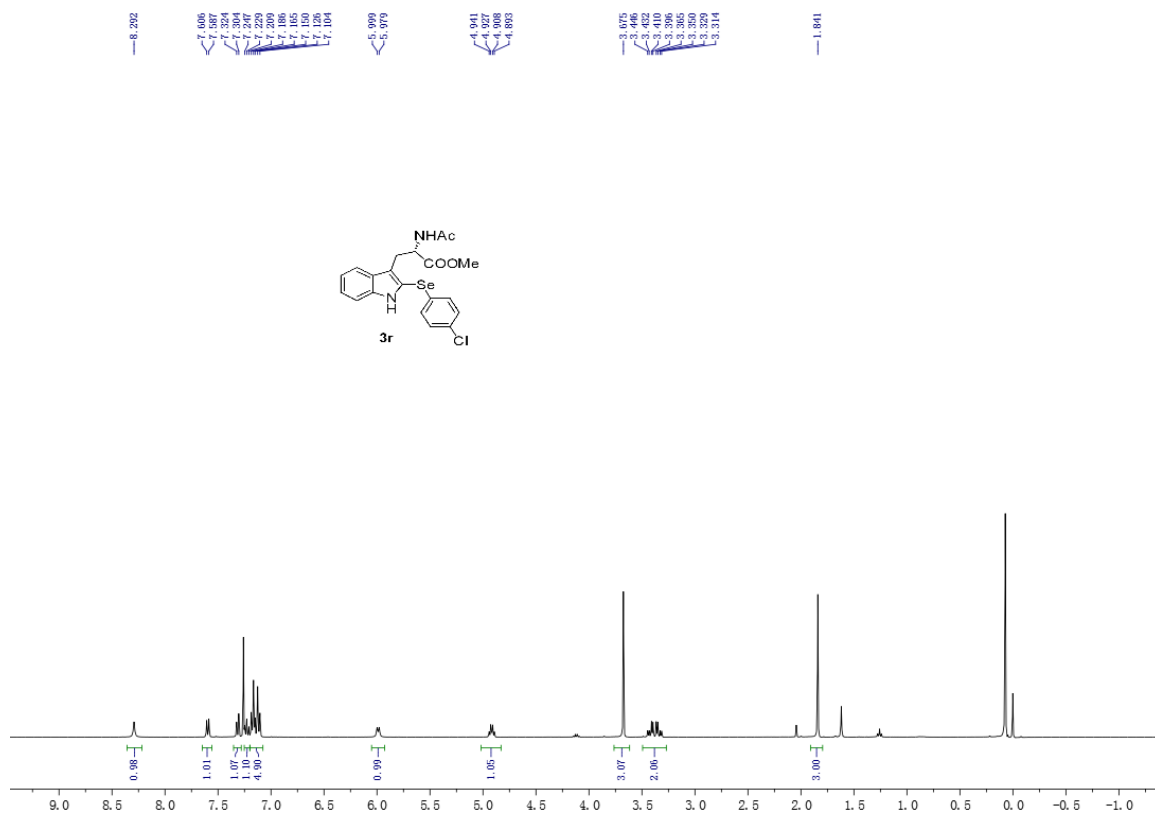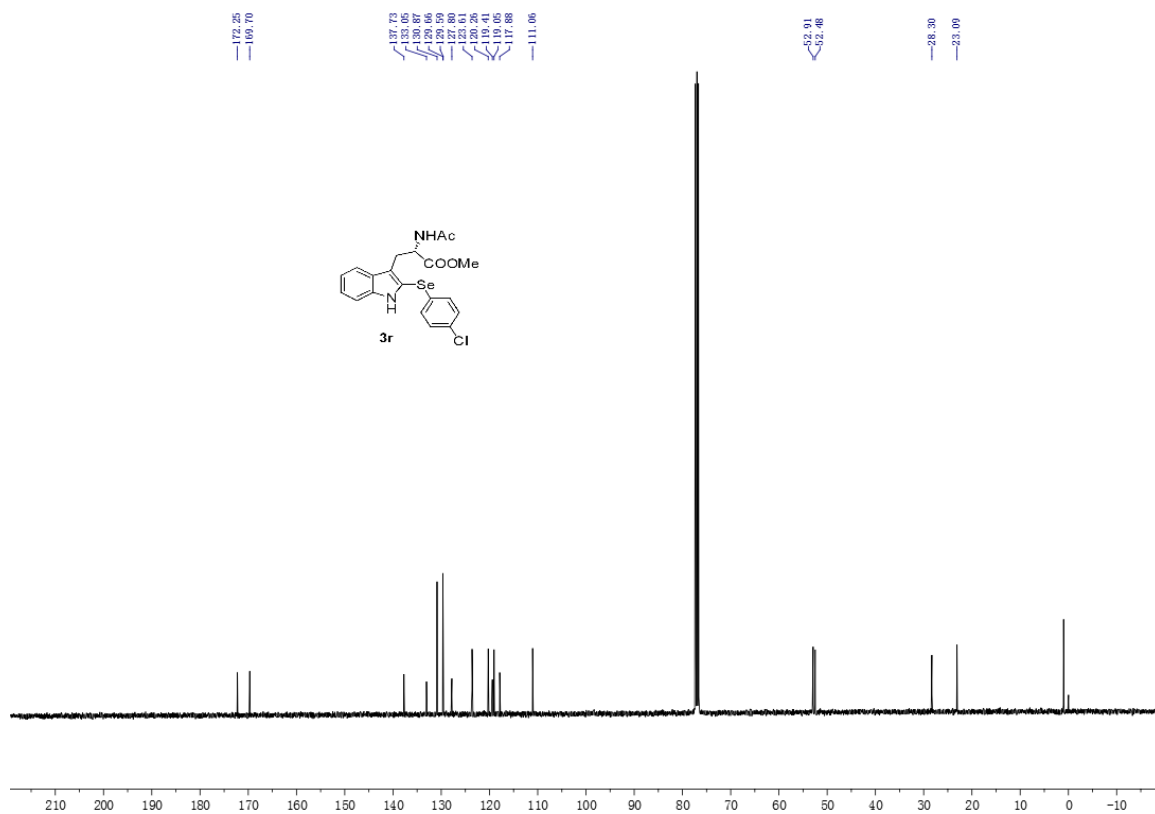

8.468  
 8.272  
 7.633  
 7.616  
 7.628  
 7.407  
 7.394  
 7.268  
 7.251  
 7.251  
 7.237  
 7.188  
 7.107  
 7.148  
 5.954  
 4.946  
 4.831  
 4.807  
 3.654  
 3.634  
 3.412  
 3.399  
 3.342  
 3.321  
 3.306  
 1.814

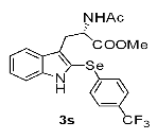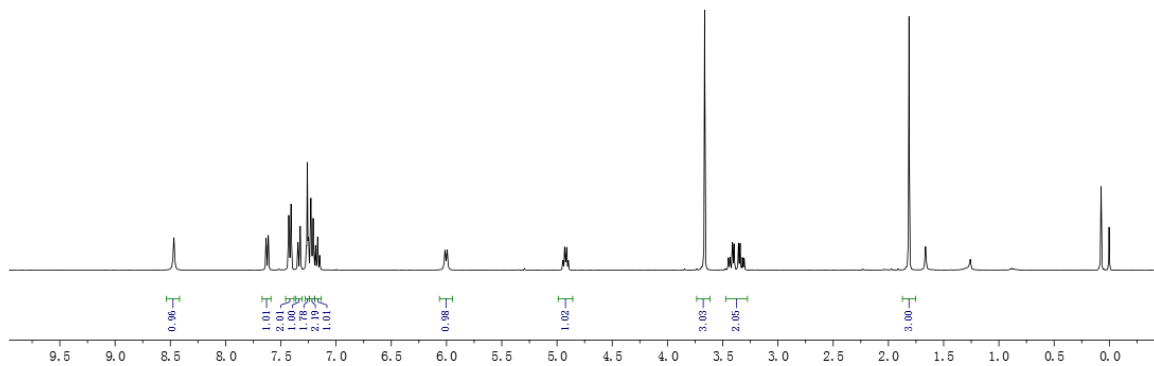

175.22  
 169.71  
 137.88  
 137.23  
 128.79  
 127.72  
 126.15  
 123.85  
 119.07  
 118.70  
 118.28  
 52.92  
 52.47  
 28.36  
 23.03

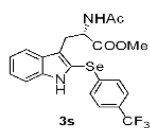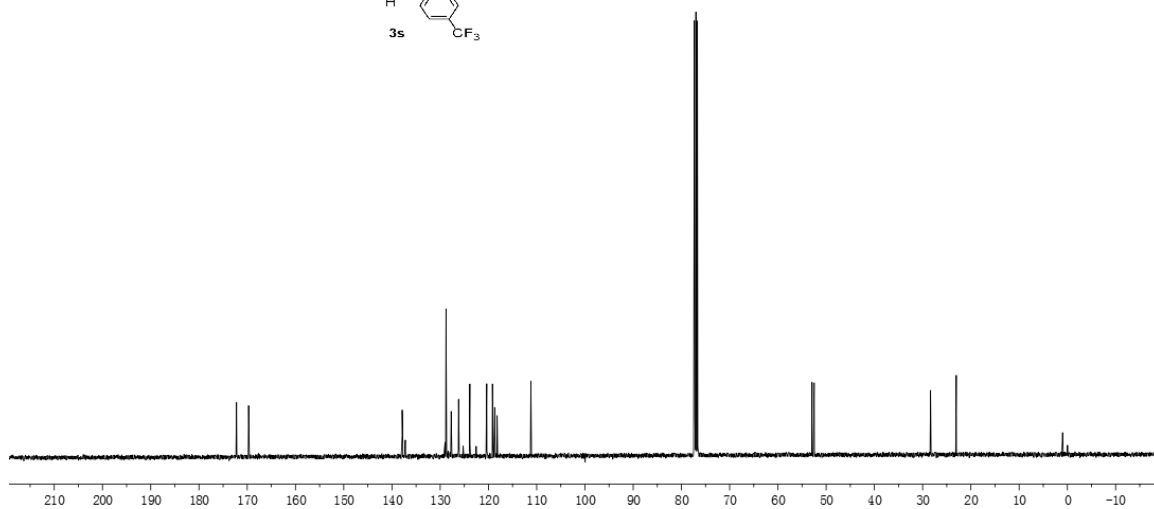



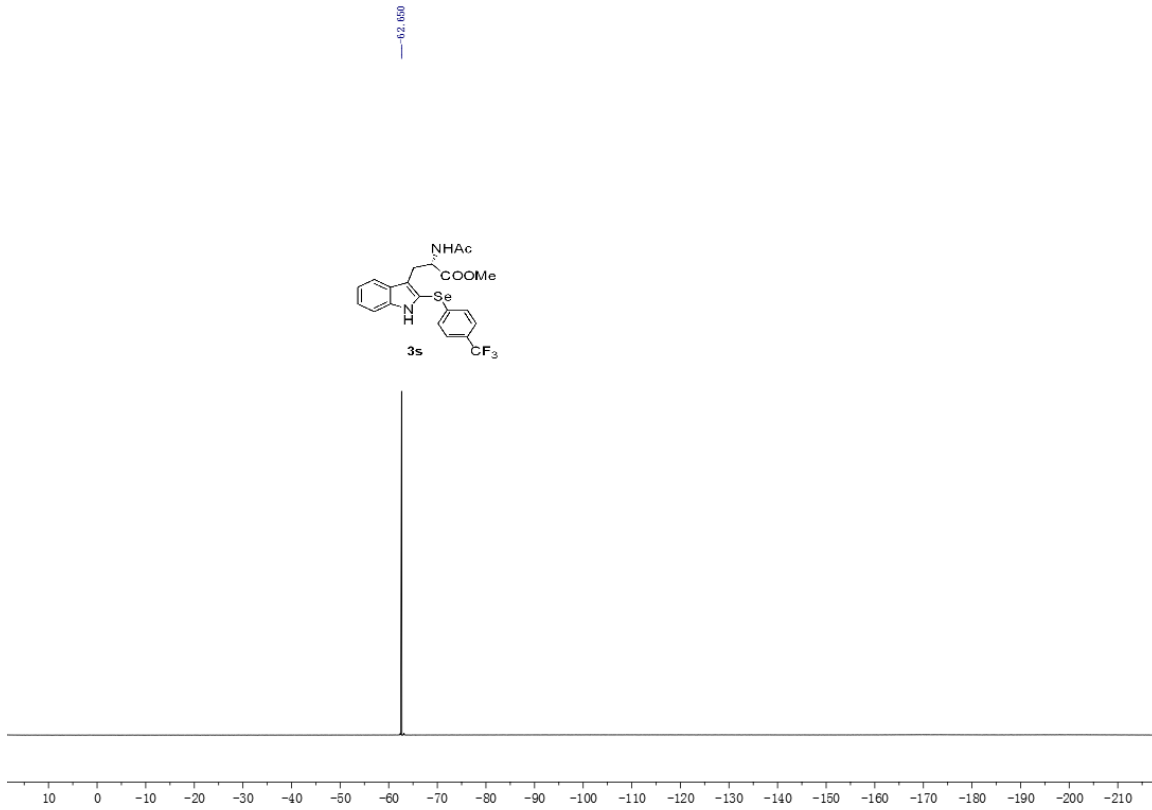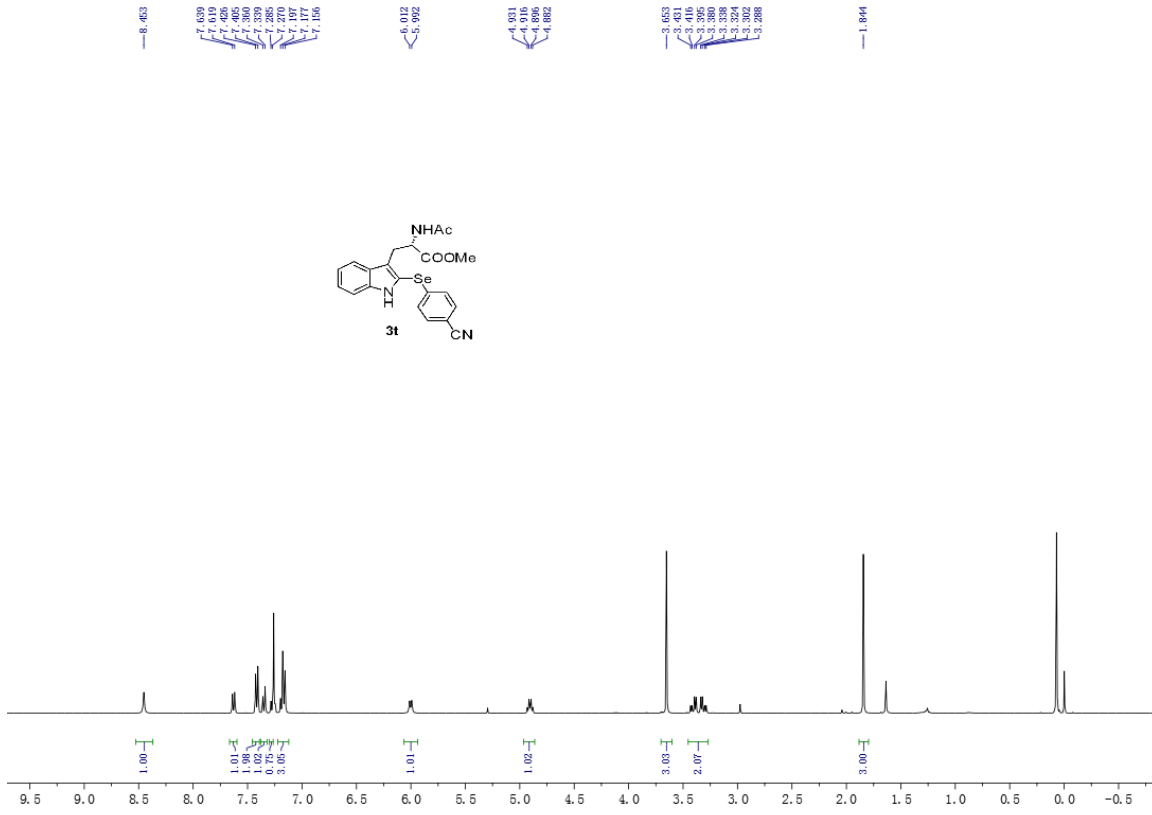

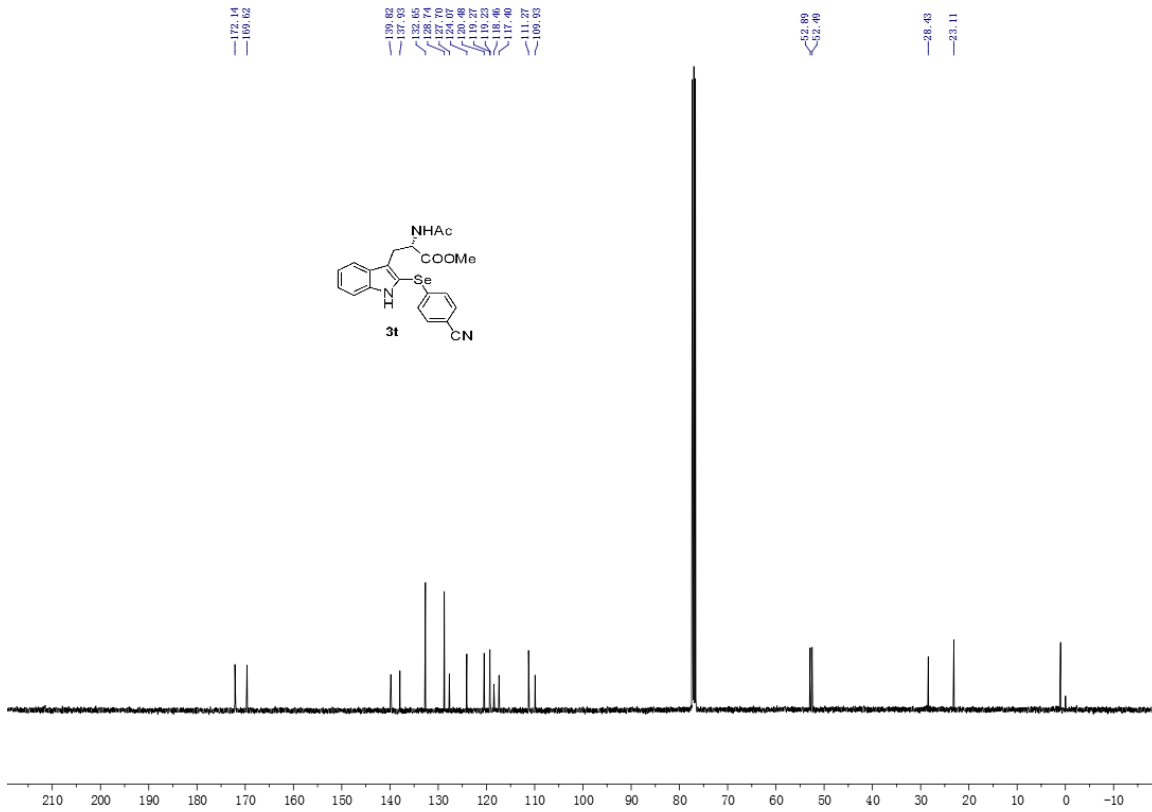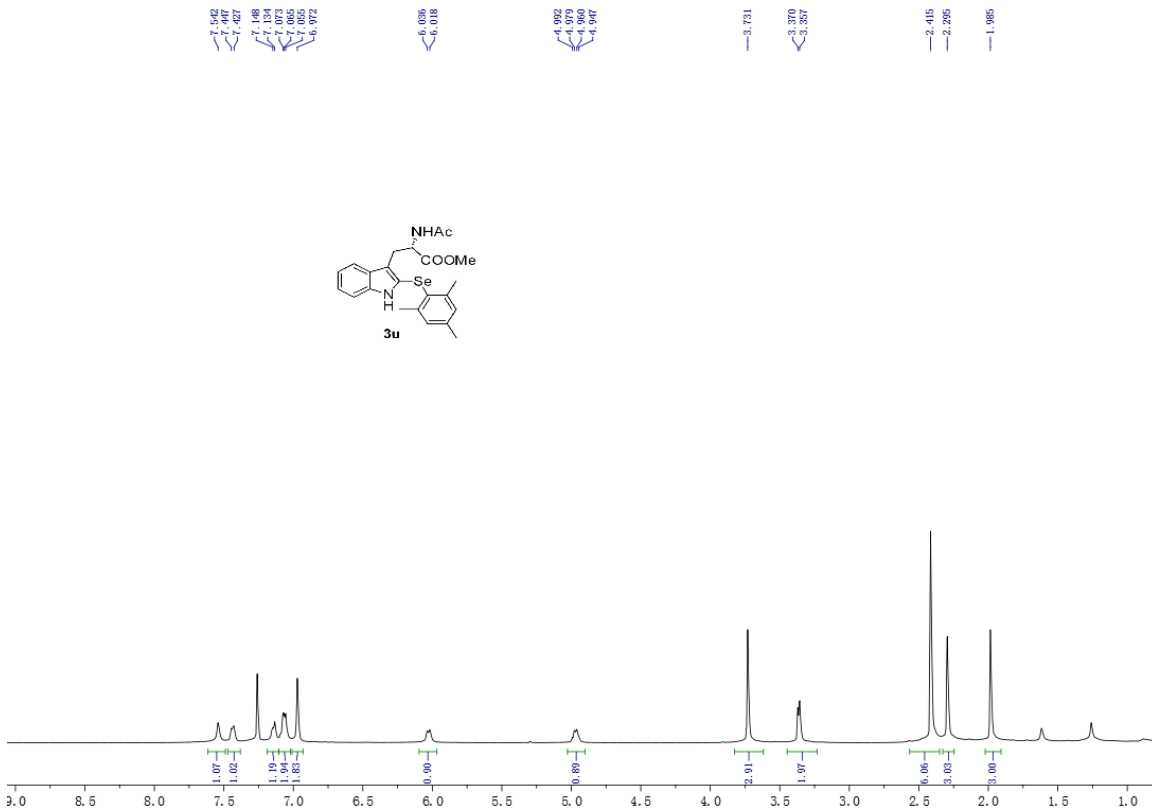

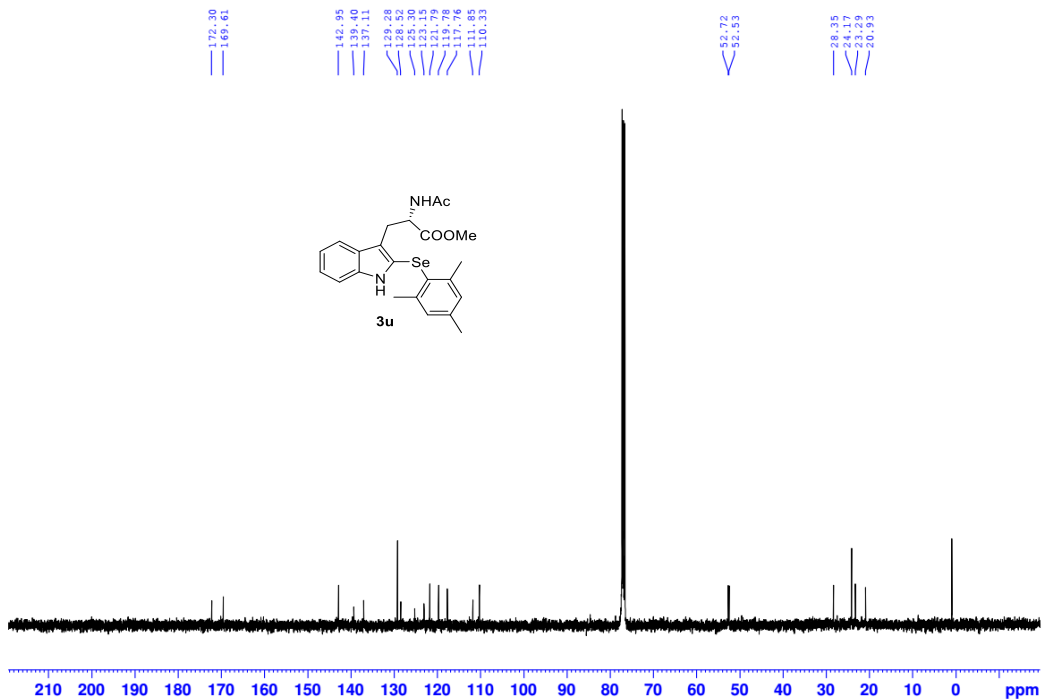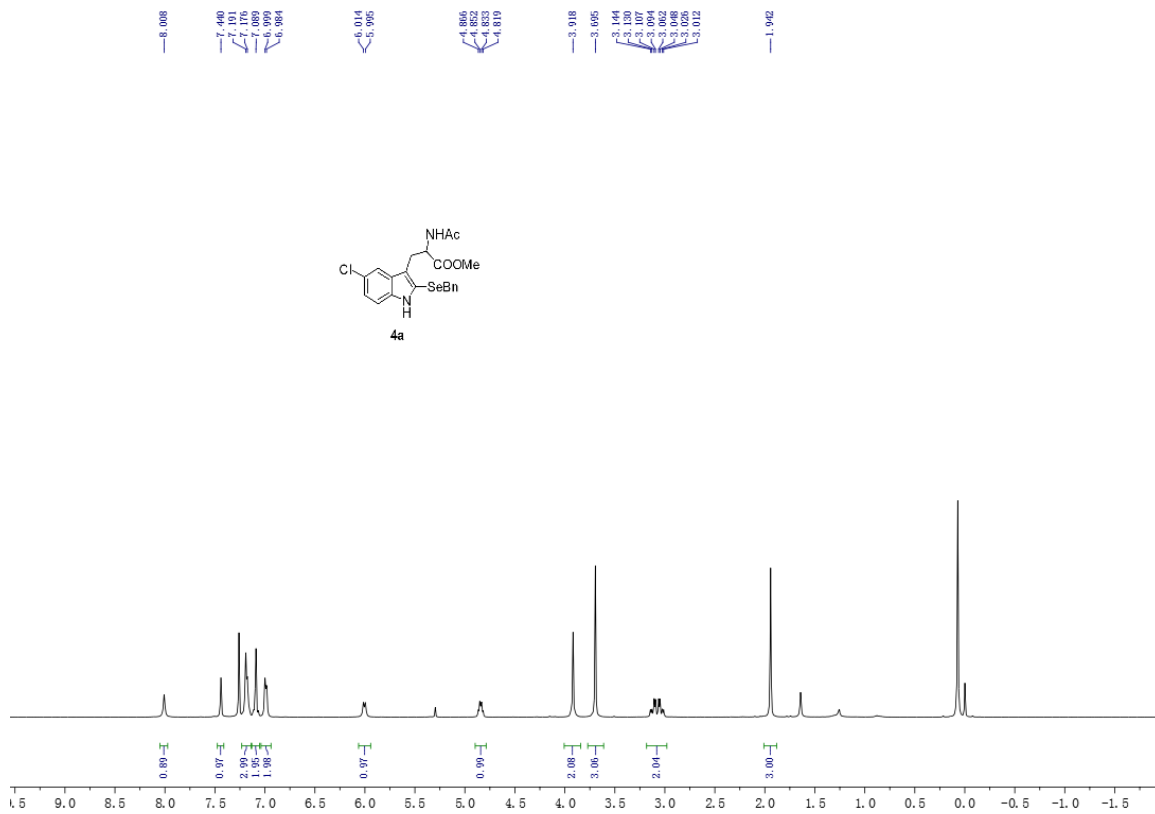

172.17  
169.63  
138.44  
135.61  
128.68  
128.55  
125.62  
123.25  
122.33  
118.24  
116.85  
111.74

52.71  
52.45  
33.45  
27.87  
23.23

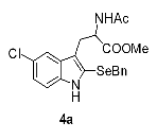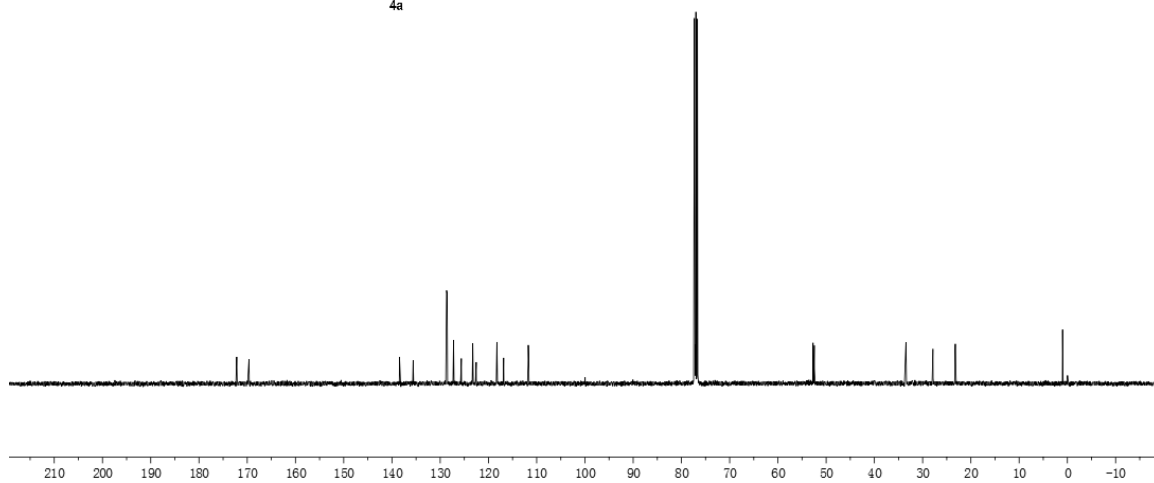

7.886  
7.880  
7.411  
7.382  
7.378  
7.202  
7.186  
7.180  
7.010  
7.004  
6.992  
6.944  
5.983  
5.956  
4.875  
4.857  
4.812  
3.918  
3.708  
3.150  
3.141  
3.111  
3.092  
3.054  
3.024  
3.006  
1.957

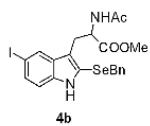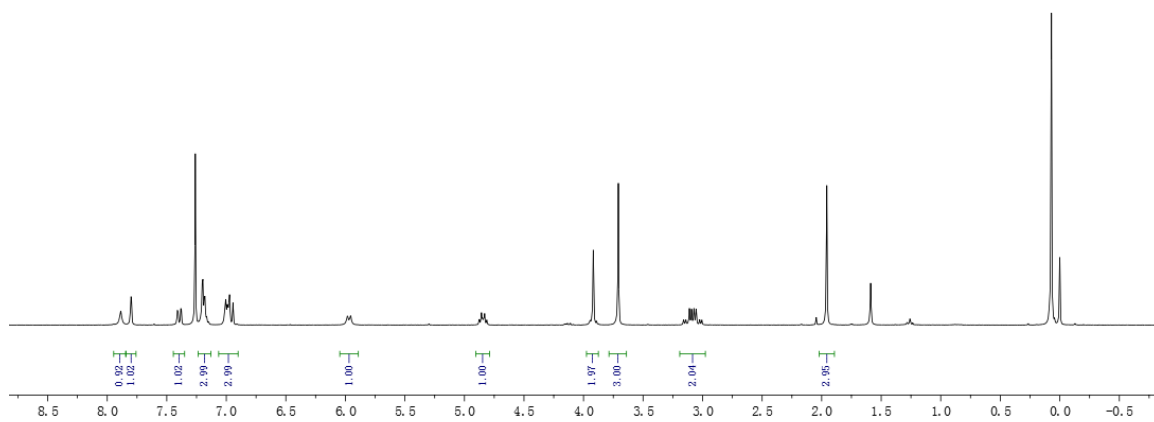

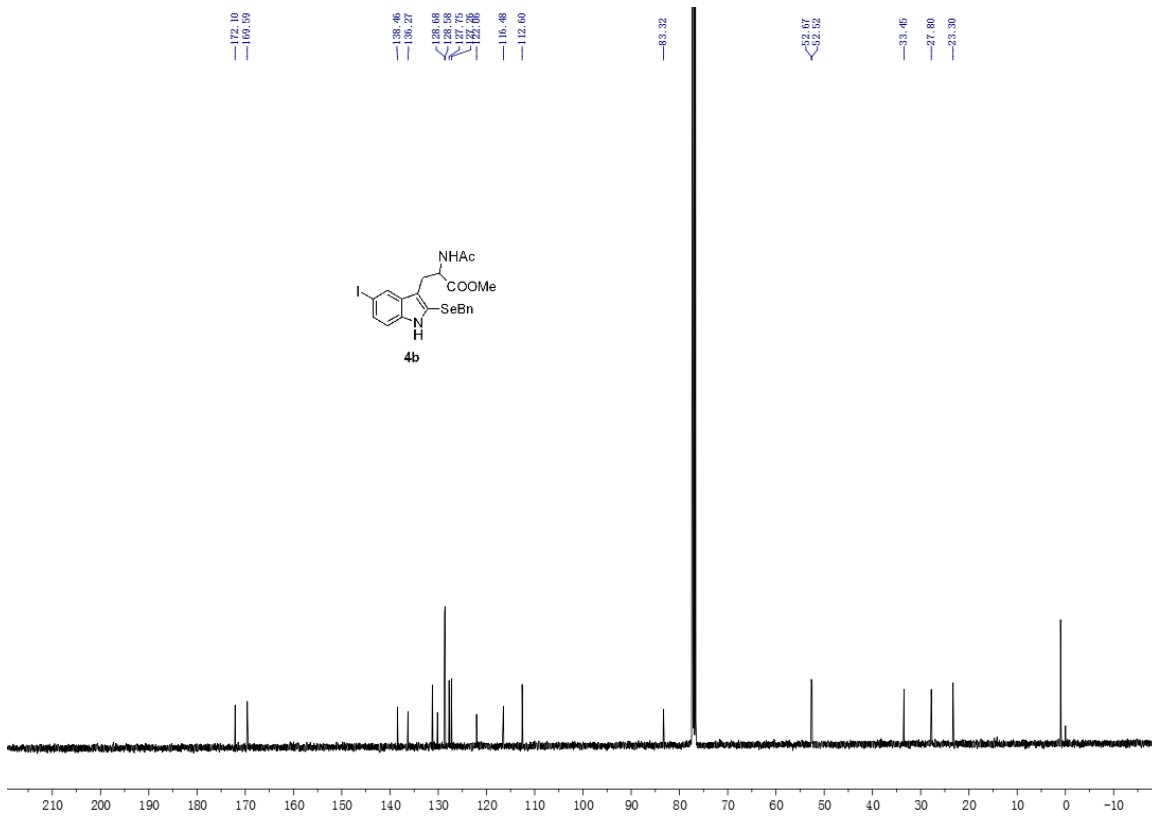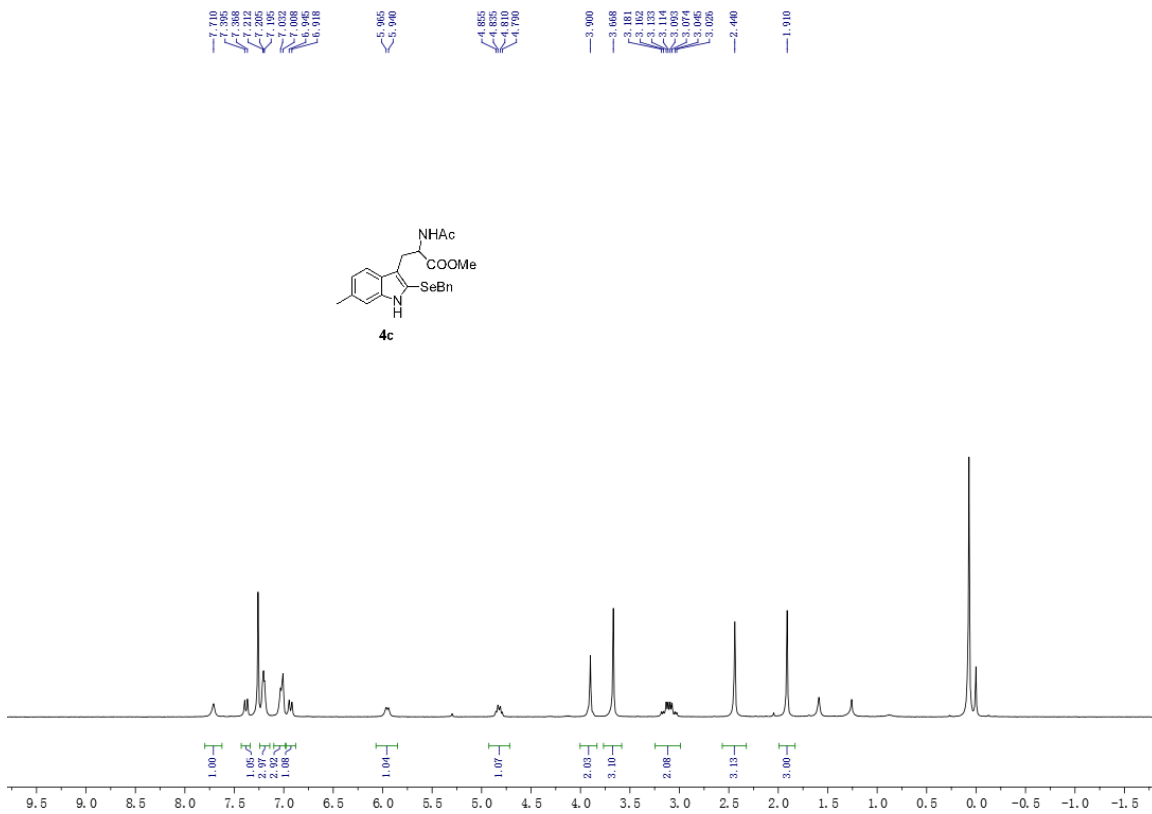

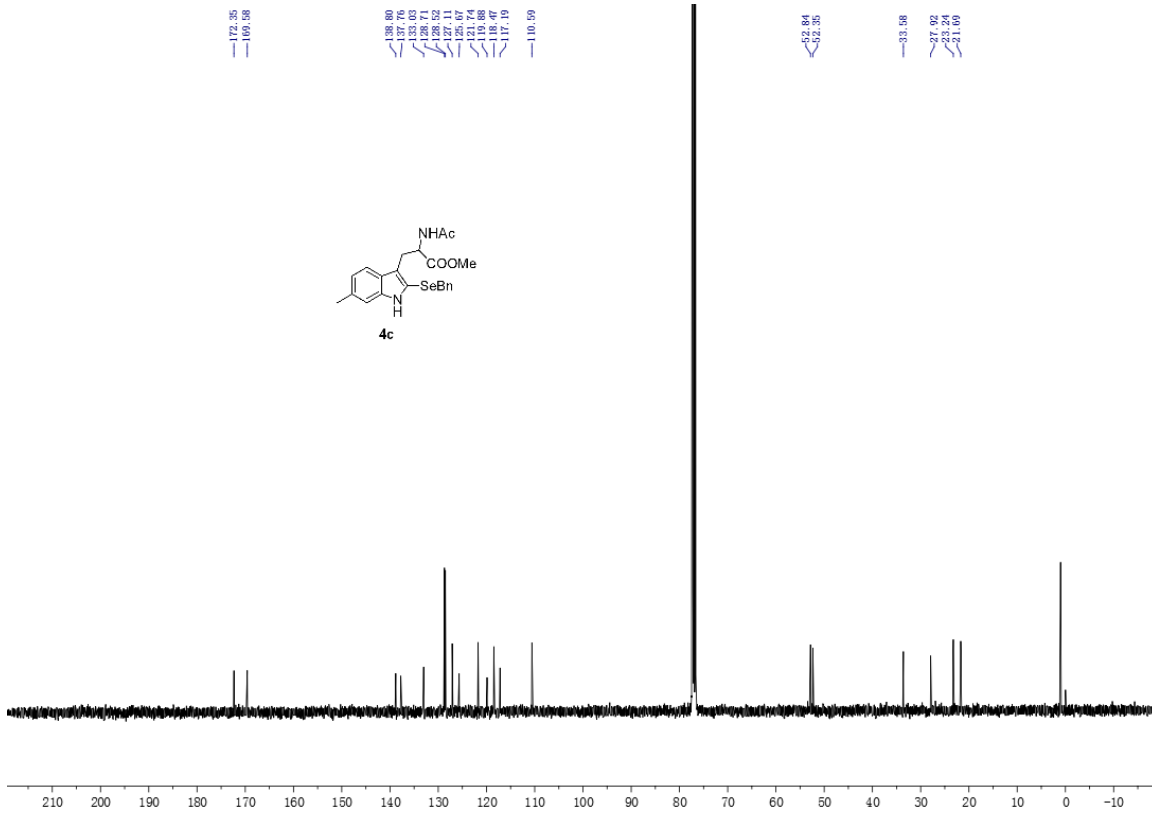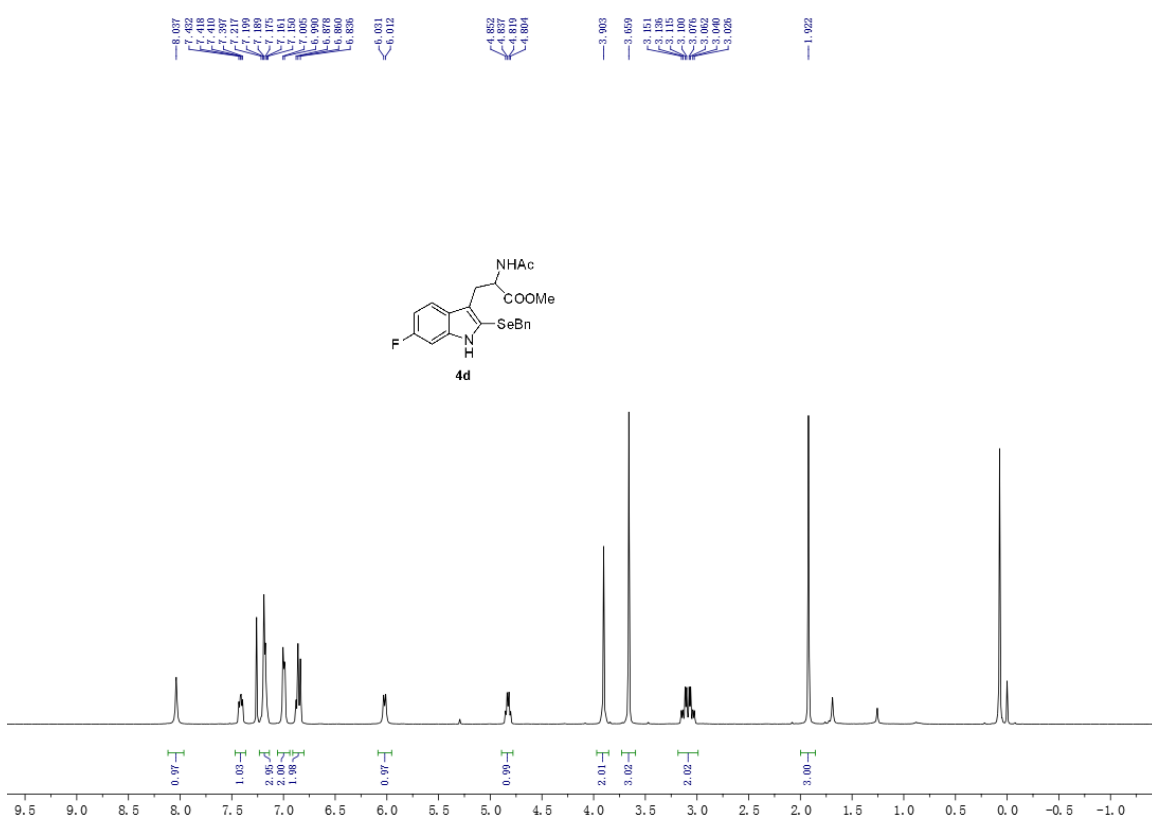

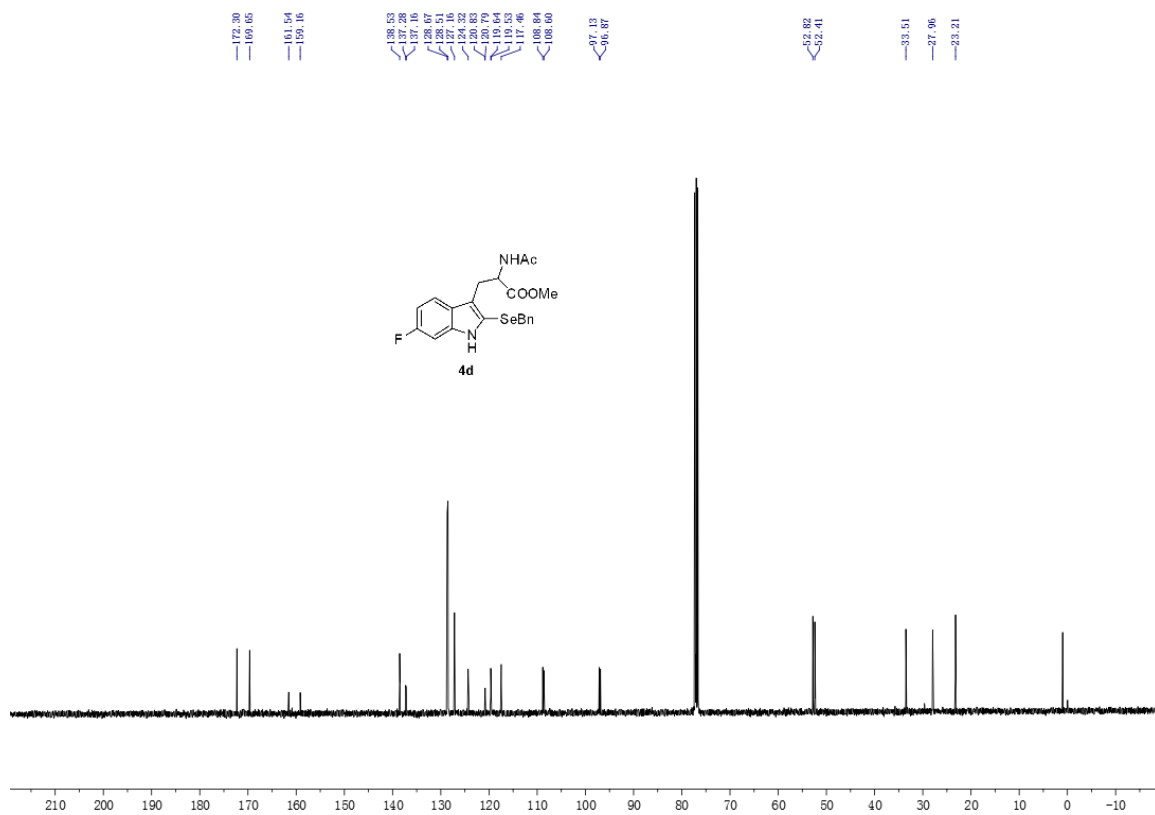

—119.48

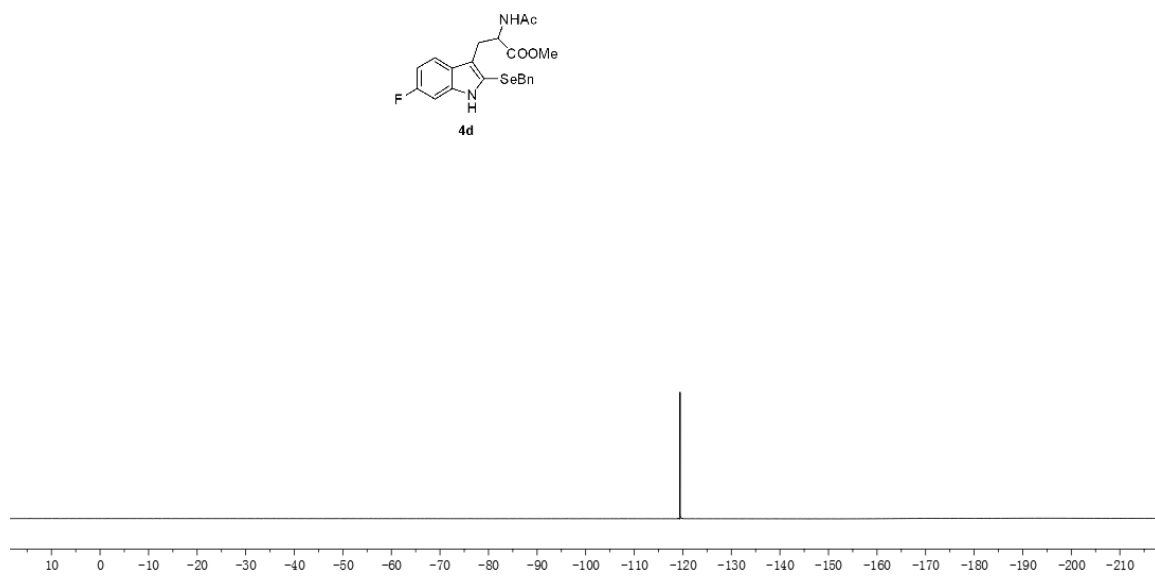

8.021  
 7.111  
 7.300  
 7.223  
 7.209  
 7.178  
 7.160  
 7.064  
 7.000  
 6.984  
 5.013  
 4.994  
 4.857  
 4.819  
 4.804  
 3.910  
 3.862  
 3.168  
 3.112  
 3.097  
 3.064  
 3.054  
 3.021  
 1.924

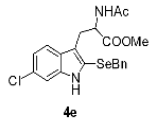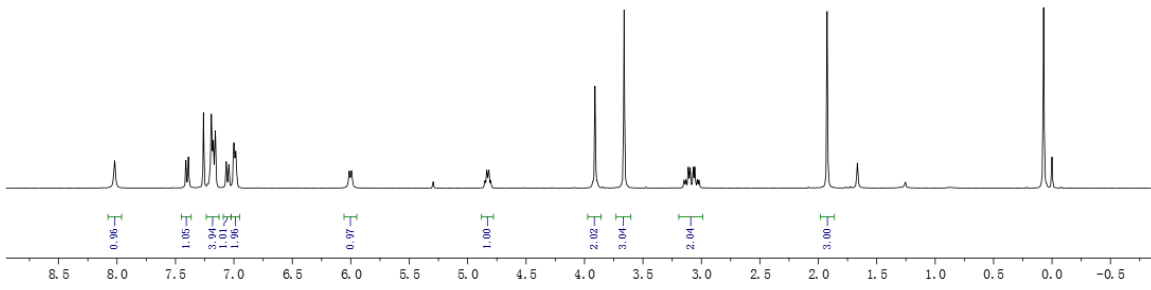

173.25  
 169.64  
 138.48  
 137.55  
 128.07  
 128.54  
 127.22  
 121.61  
 120.59  
 117.38  
 110.61  
 52.78  
 52.46  
 33.47  
 27.92  
 23.23

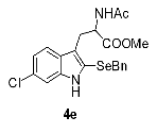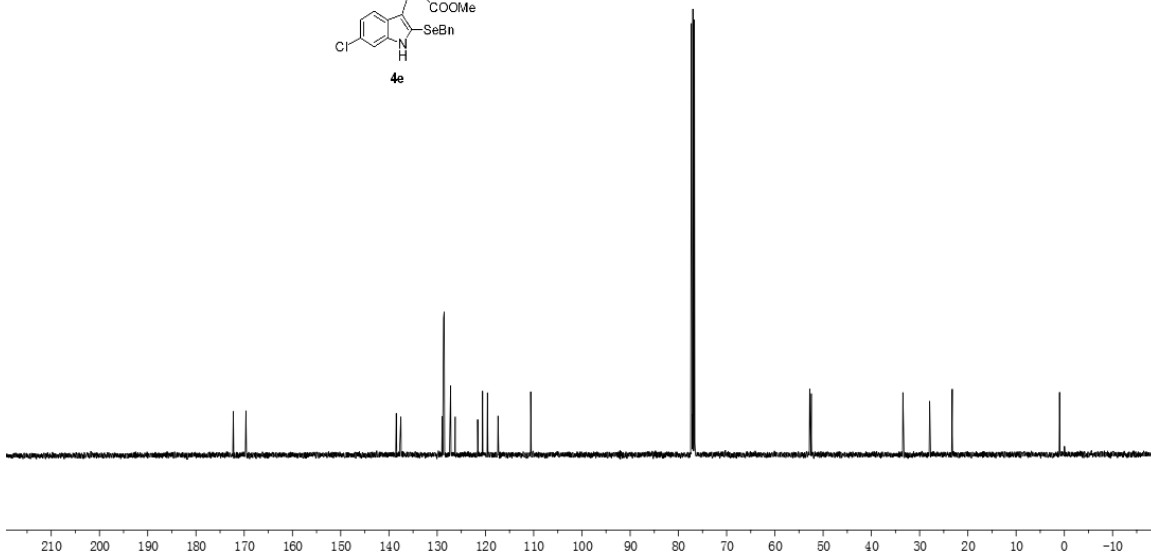



7.593  
7.367  
7.341  
7.228  
7.211  
7.206  
7.109  
7.089  
7.068  
7.045  
7.025  
7.019  
6.993  
6.988  
6.959

4.891  
4.872  
4.865  
4.826

3.930

3.877

3.791

3.242

3.213

3.170

3.151

3.122

3.103

2.395

1.912

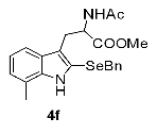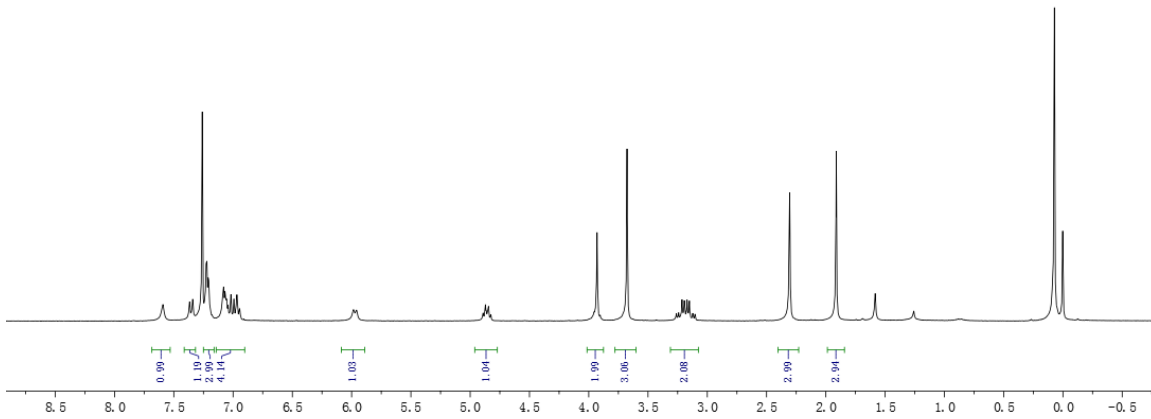

172.34  
160.58

136.97  
136.92  
128.85  
128.58  
127.26  
125.42  
125.42  
120.44  
119.90  
117.51  
116.46

52.89  
52.37

33.52  
28.10  
23.25  
16.33

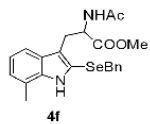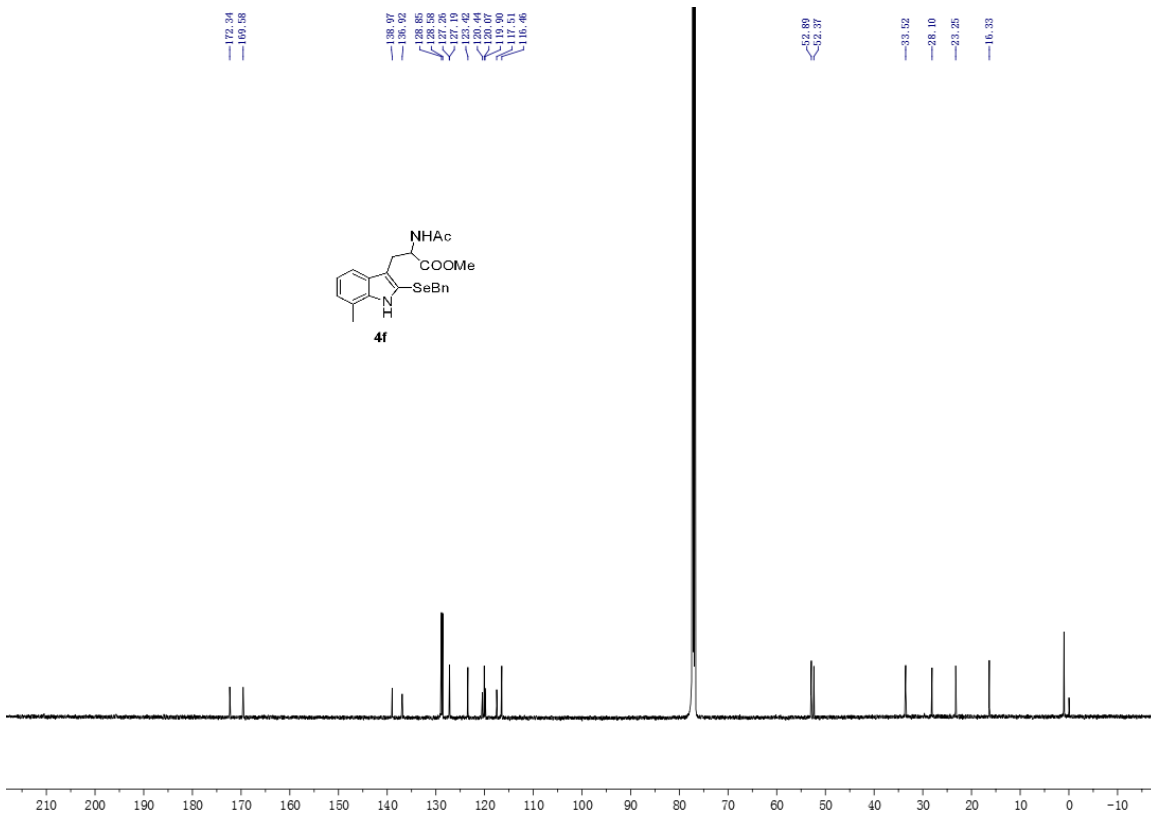

7.840  
 7.486  
 7.466  
 7.231  
 7.209  
 7.194  
 7.117  
 7.098  
 7.004  
 6.999  
 6.863  
 4.824  
 4.808  
 4.790  
 4.170  
 3.019  
 3.688  
 3.216  
 3.201  
 3.179  
 3.156  
 3.141  
 3.124

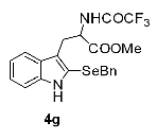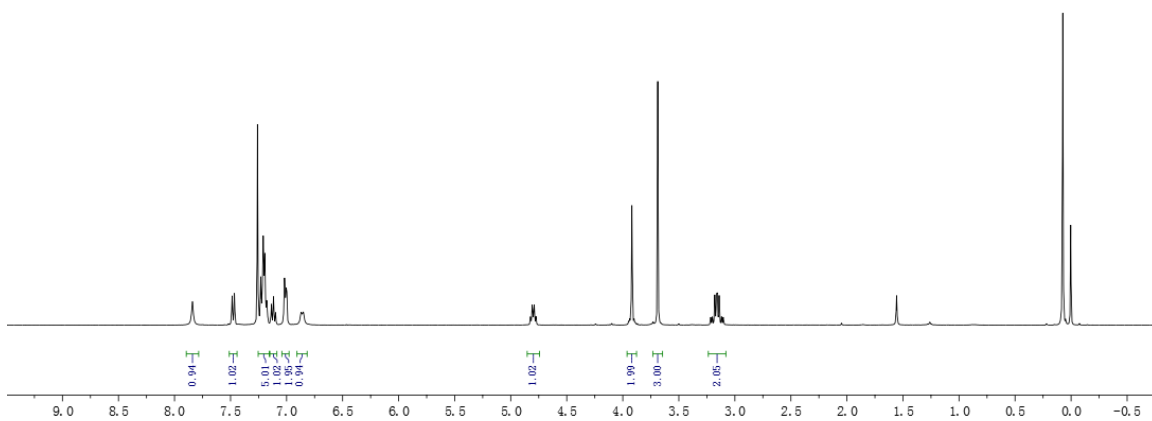

170.60  
 157.22  
 156.84  
 156.47  
 156.09  
 138.56  
 137.35  
 128.70  
 128.53  
 127.90  
 127.30  
 123.30  
 120.72  
 119.81  
 118.44  
 116.55  
 114.09  
 111.23  
 110.94  
 53.24  
 52.81  
 33.54  
 32.47

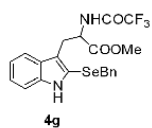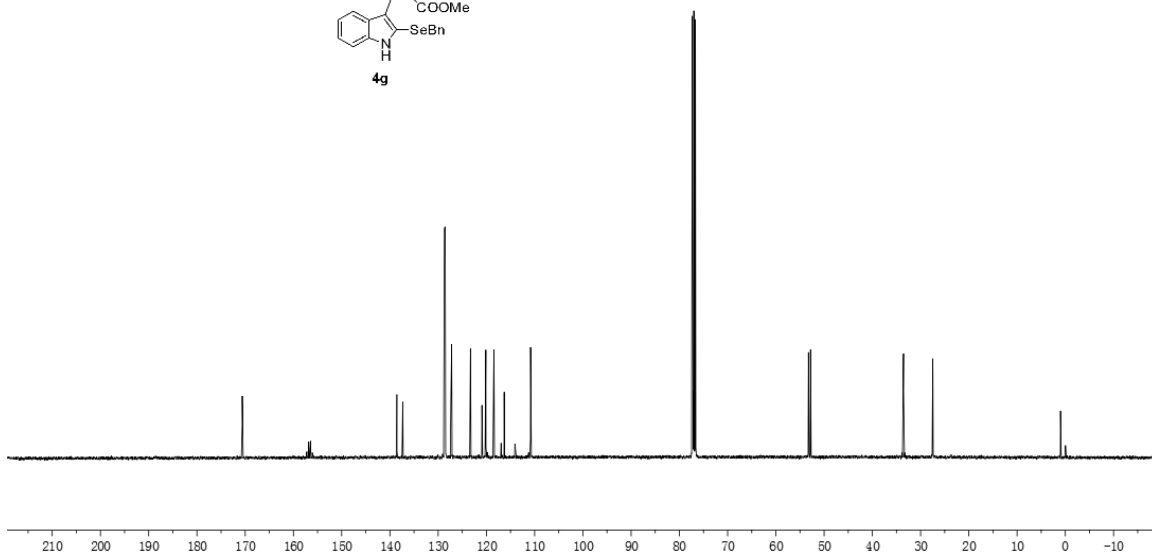

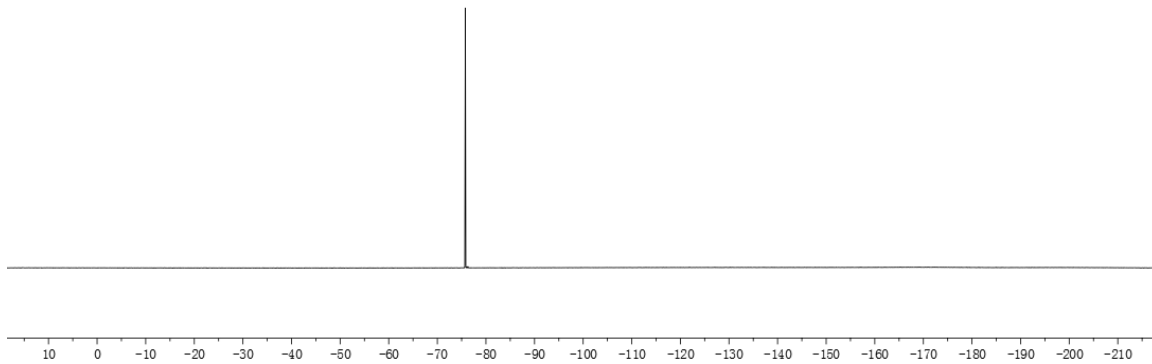

7.790, 7.780, 7.760, 7.566, 7.548, 7.530, 7.500, 7.501, 7.398, 7.379, 7.381, 7.286, 7.250, 7.204, 7.188, 7.181, 7.128, 7.109, 7.044, 7.030, 7.025, 5.393, 5.373, 4.084, 4.069, 4.053, 4.028, 4.021, 4.013, 3.987, 3.242, 3.220, 3.175, 3.156, 3.137, 3.121

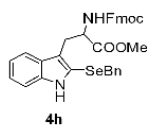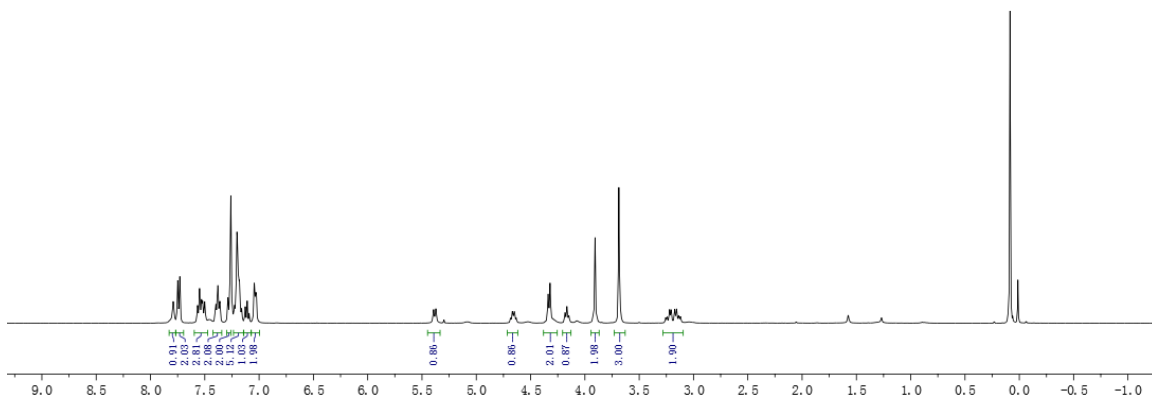

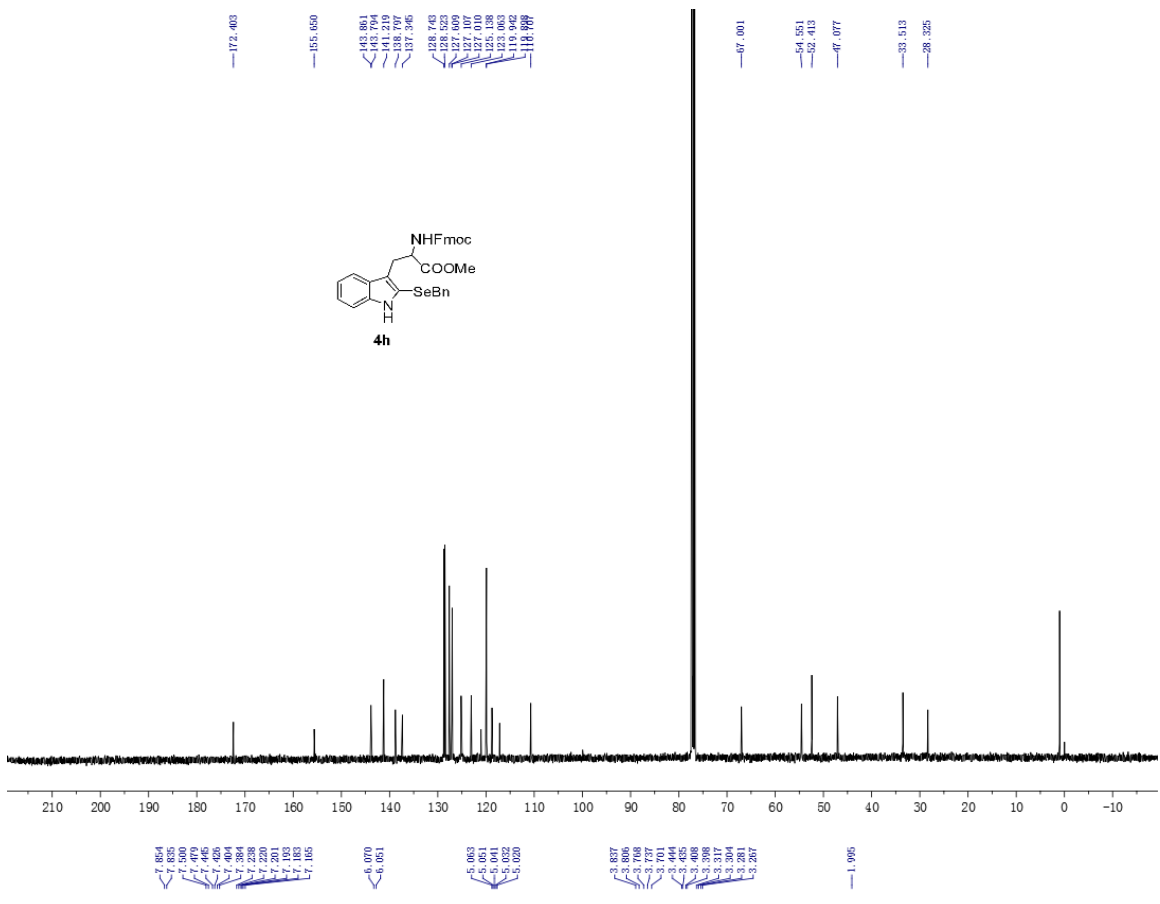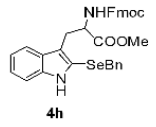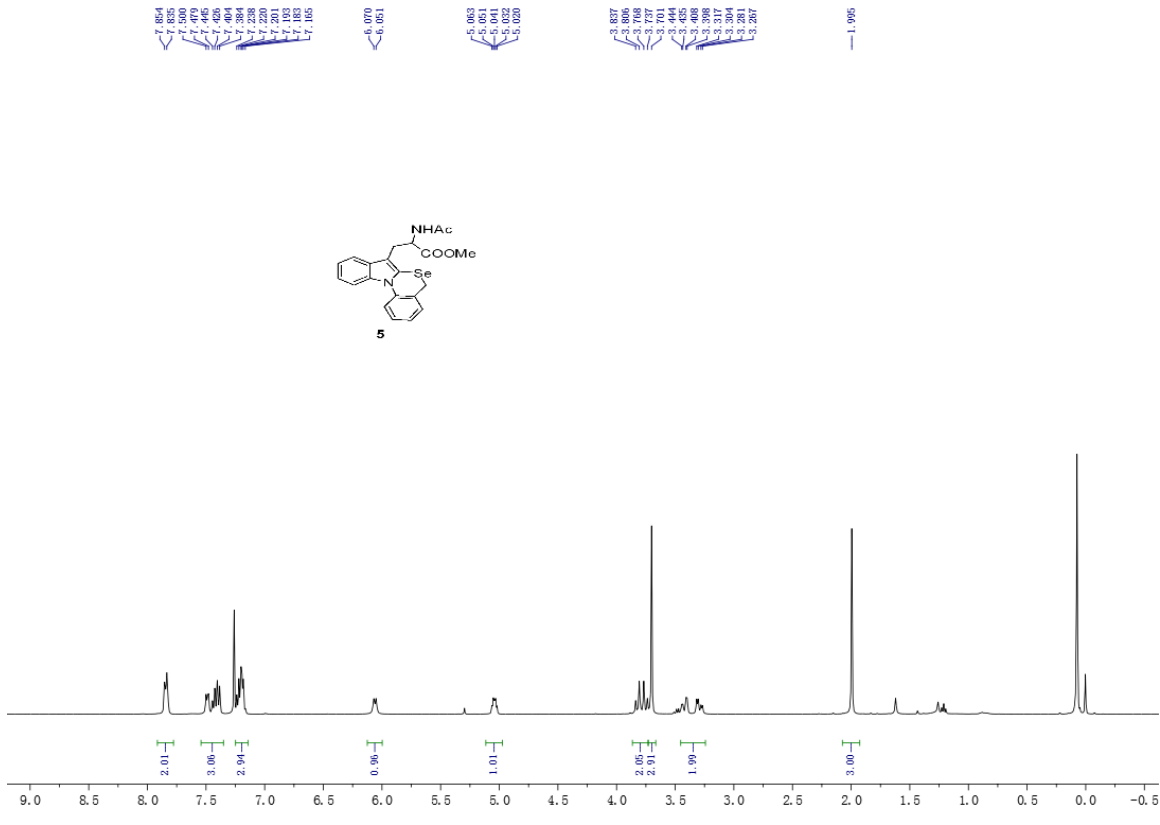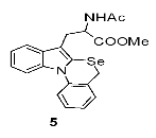

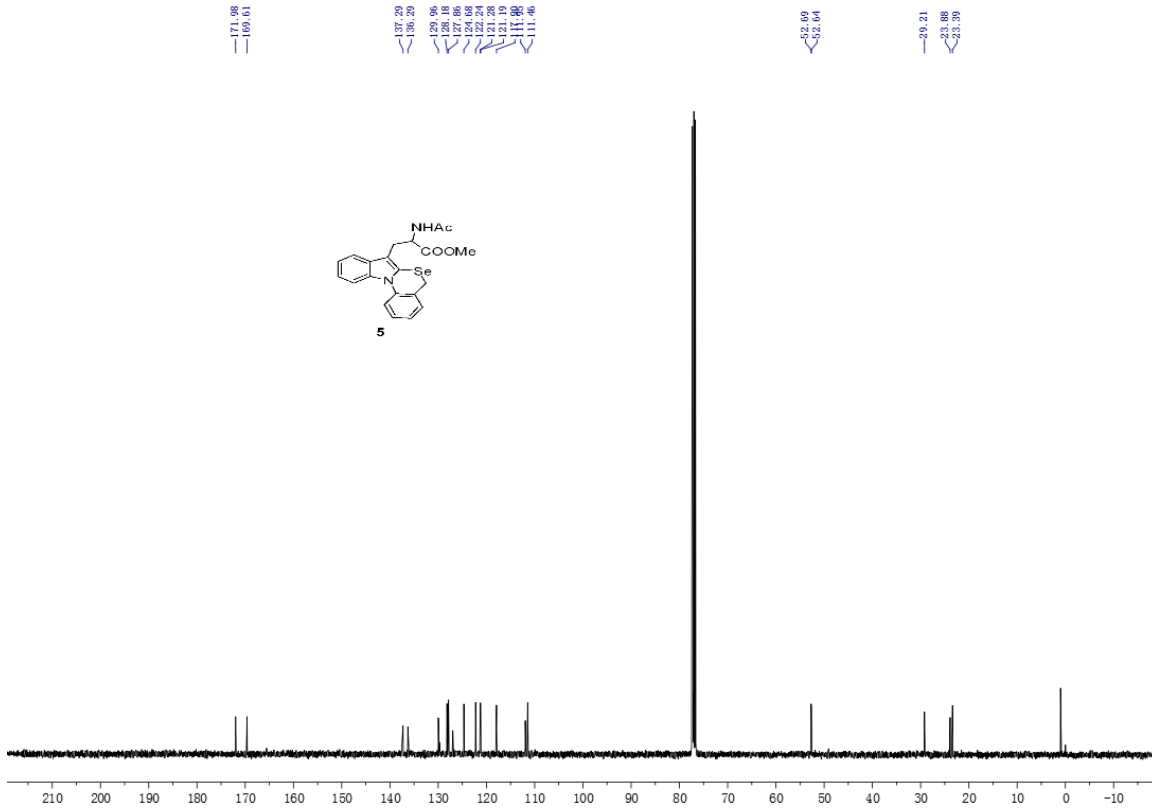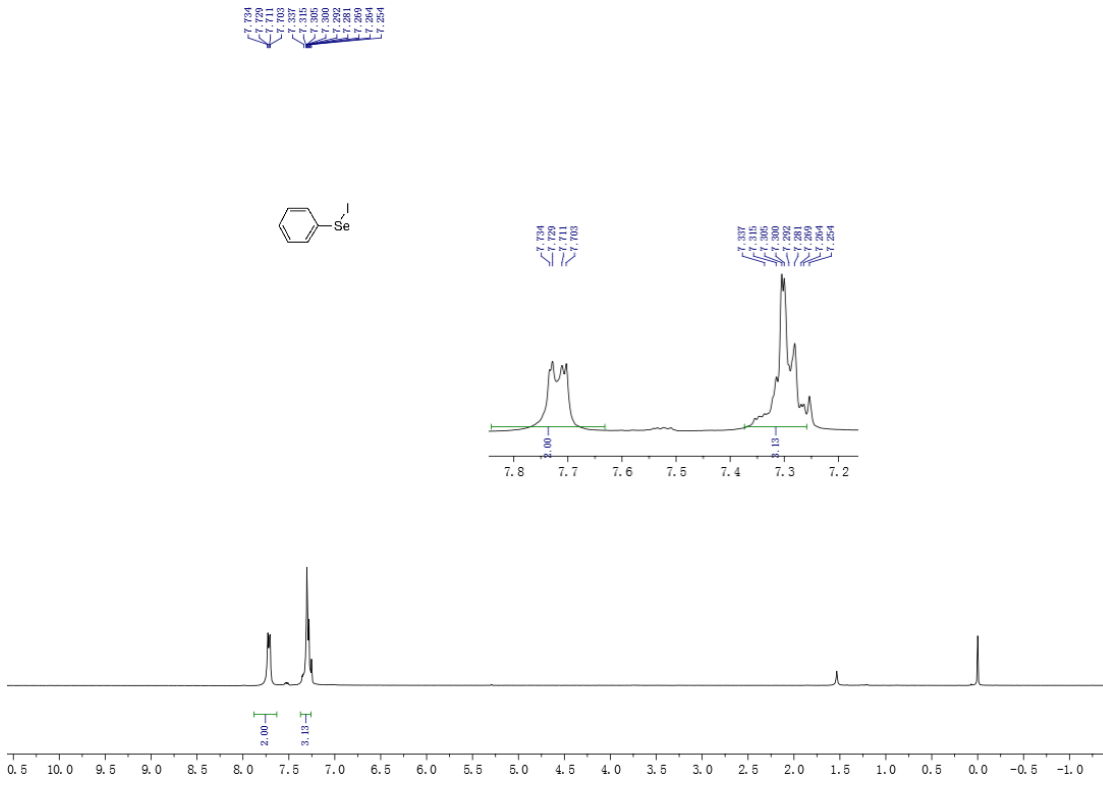

134.14  
133.88  
133.62

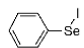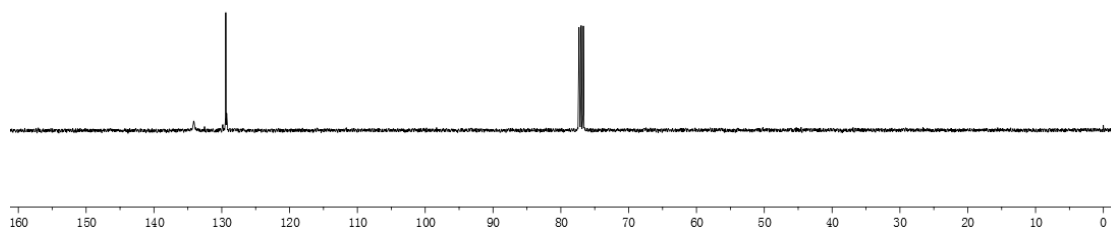

## 8. HPLC spectra

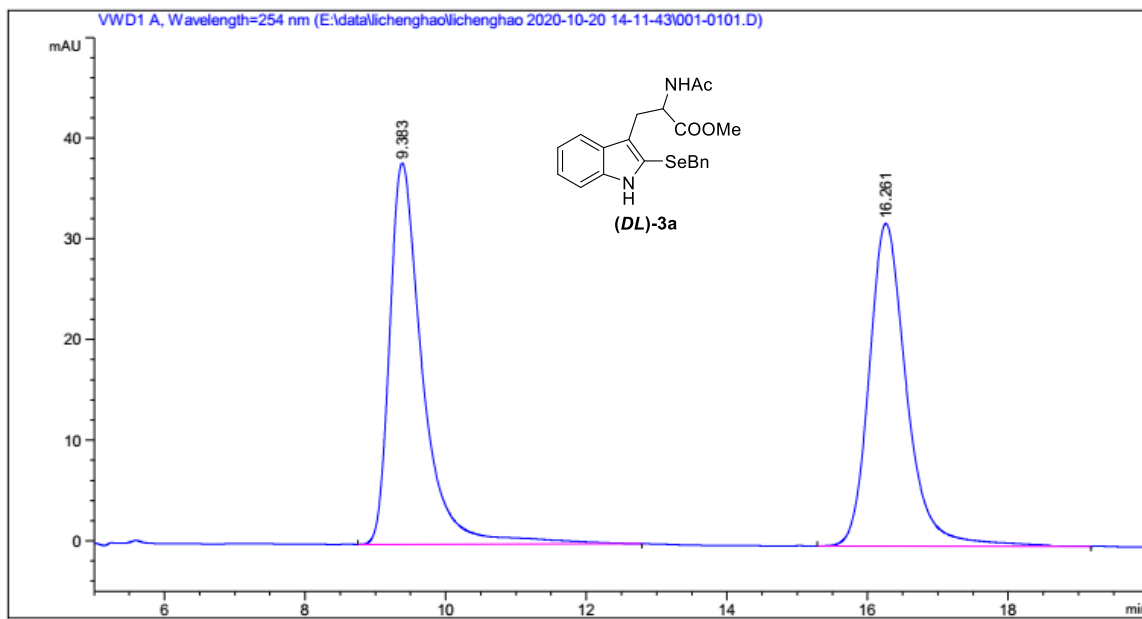

| 峰 # | 保留时间 [min] | 类型 | 峰宽 [min] | 峰面积 [mAU*s] | 峰高 [mAU] | 峰面积 %   |
|-----|------------|----|----------|-------------|----------|---------|
| 1   | 9.383      | BB | 0.4825   | 1232.21887  | 37.87691 | 50.9513 |
| 2   | 16.261     | BB | 0.5590   | 1186.20630  | 32.03588 | 49.0487 |

总量 :                      2418.42517    69.91279

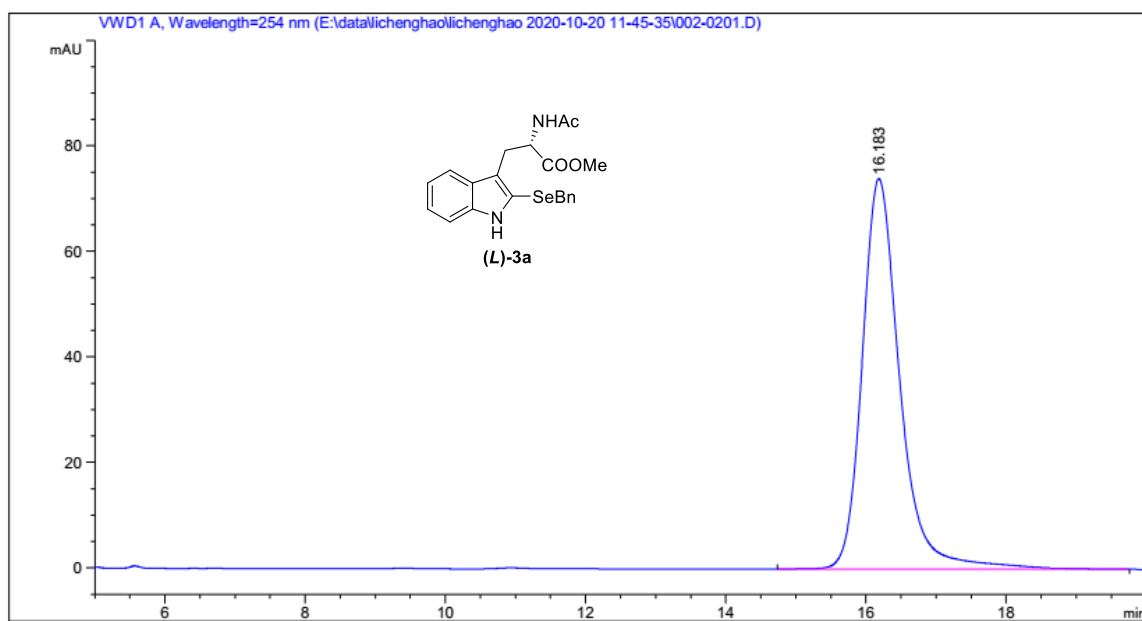

| 峰 # | 保留时间 [min] | 类型 | 峰宽 [min] | 峰面积 [mAU*s] | 峰高 [mAU] | 峰面积 %    |
|-----|------------|----|----------|-------------|----------|----------|
| 1   | 16.183     | BB | 0.5650   | 2766.55493  | 74.02369 | 100.0000 |

## 9. CD Spectra

CD spectra were recorded on a Jasco J810 instrument using a cell of 1cm path length. Spectral accumulation parameters included the scanning rate at 1000 nm/min with a 1-nm bandwidth, over the wavelength range of 200-600 nm. Each spectrum was obtained from an average of 5 scans. The CD spectra were measured with **1a** (ca.  $5 \times 10^{-5}$  M) and **3a** (ca.  $4 \times 10^{-5}$  M) in CH<sub>3</sub>CN at 25 °C. The CD spectra were corrected for solvent contributions.

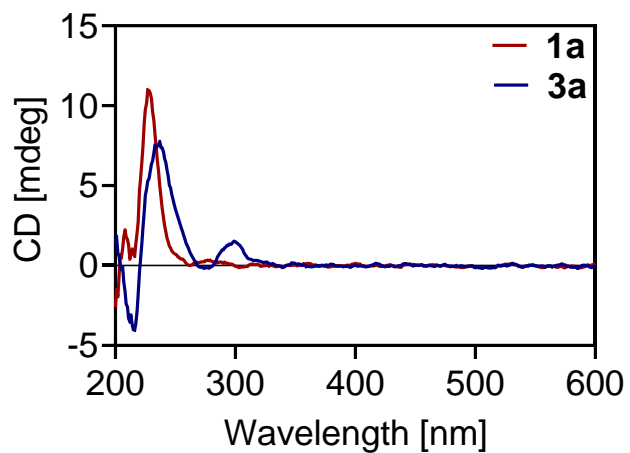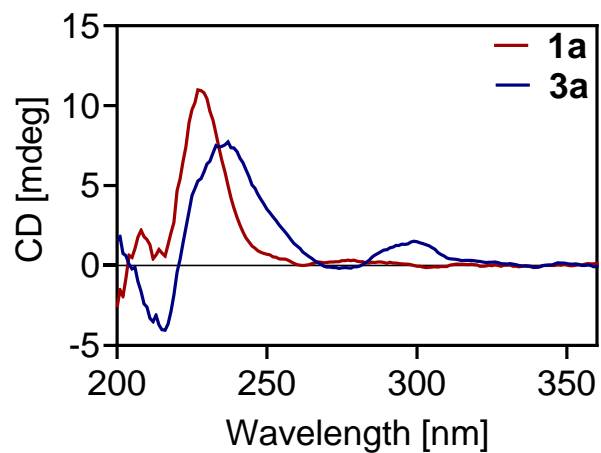



## 10. References

- [1] M. Martínez-Mingo, N. Rodríguez, R. G. Arrayás, and J. C. Carretero, *Org. Lett.*, 2019, **21**, 4345-4349.
- [2] C. P. Katzka, PhD. Dissertation, Universität Dortmund of Germany, 2009.
- [3] S. Johansson, T. Redeby, T. M. Altamore, Ulrika Nilsson, A. Börje, *Chem. Res. Toxicol.*, 2009, **22**, 1774-1781.
- [4] M. Iwaoka, T. Katsuda, H. Komatsu, S. Tomoda, *J. Org. Chem.*, 2005, **70**, 321-327.
- [5] K. M. N. Win, A. D. Sonawane and M. Koketsu, *Org. Biomol. Chem.*, 2019, **17**, 9039-9049.
